# Supplementary material for: Effect of C7-substitution of 1-arylsulfonyl-5-(N-hydroxyacrylamide)indolines on the selectivity towards a subclass of histone deacetylases
Source: Royal Society of Chemistry journal article supplement (doi:10.1039/c4ob00542b), 2014-09-12

**Electronic Supplementary Information**

**Effect of C7-Substitution of  
1-Arylsulfonyl-5-(N-hydroxyacrylamide)indolines on the Selectivity  
Toward Subclass of Histone Deacetylase.**

Hsueh-Yun Lee,<sup>a,†</sup> Li-Ting Wang,<sup>b,†</sup> Yu-Hsuan Li,<sup>a</sup> Shiow-Lin Pan,<sup>c</sup> Yi-Lin Chen,<sup>c</sup> Che-Ming Teng,<sup>b</sup>  
and Jing-Ping Liou\*<sup>a</sup>

**Contents:**

|                                                           |      |
|-----------------------------------------------------------|------|
| HPLC purity data for synthetic compounds.....             | ESI2 |
| <sup>1</sup> H-NMR Spectra for synthetic compounds.....   | ESI3 |
| <sup>13</sup> C-NMR Spectra for synthetic compounds ..... | ES39 |

**HPLC purity determination:**

The percentage purity of compounds were determined by an Agilent 1100 series HPLC system using C18 column.

Elution conditions: Mobile phase A-Acetonitrile; Mobile phase B-Water containing 0.1% formic acid + 10 mmol NH<sub>4</sub>OAc. The flow-rate was 0.2 ml/min and the injection volume was 5 µl. The system operated at 25 °C. Peaks were detected at 210 nm.

**Table 1.** Elution condition

| Time (min) | Mobile Phase A (ratio) | Mobile Phase B (ratio) |
|------------|------------------------|------------------------|
| 0          | 10                     | 90                     |
| 45         | 90                     | 10                     |
| 50         | 10                     | 90                     |
| 60         | 10                     | 90                     |

**Table 2.** Purity of synthetic compounds

C18 column: Agilent ZORBAX Eclipse XDB-C18 5µm. 4.6 mm × 150 mm column

| Compounds | Retention time (min) | % Purity |
|-----------|----------------------|----------|
| <b>9</b>  | 20.71                | 96.52    |
| <b>10</b> | 23.26                | 95.91    |
| <b>11</b> | 23.72                | 95.60    |
| <b>12</b> | 24.29                | 97.54    |
| <b>13</b> | 24.89                | 98.95    |
| <b>17</b> | 22.12                | 94.52    |

<sup>1</sup>H Spectrum for compound 9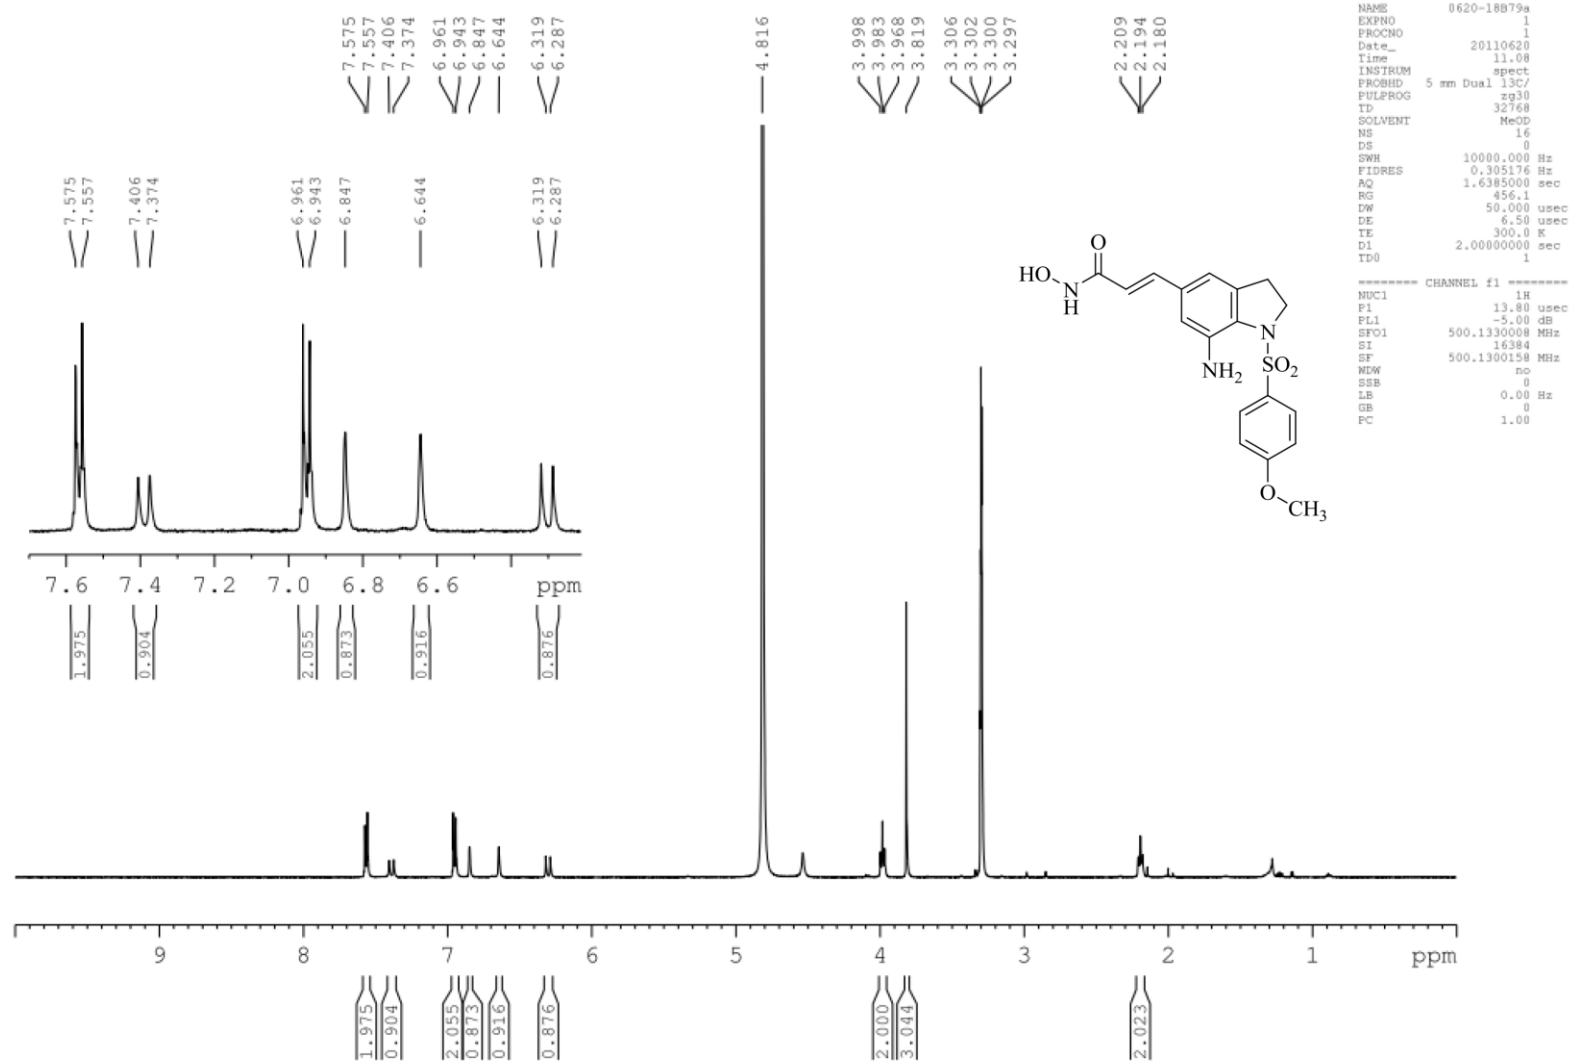

<sup>1</sup>H Spectrum for compound 10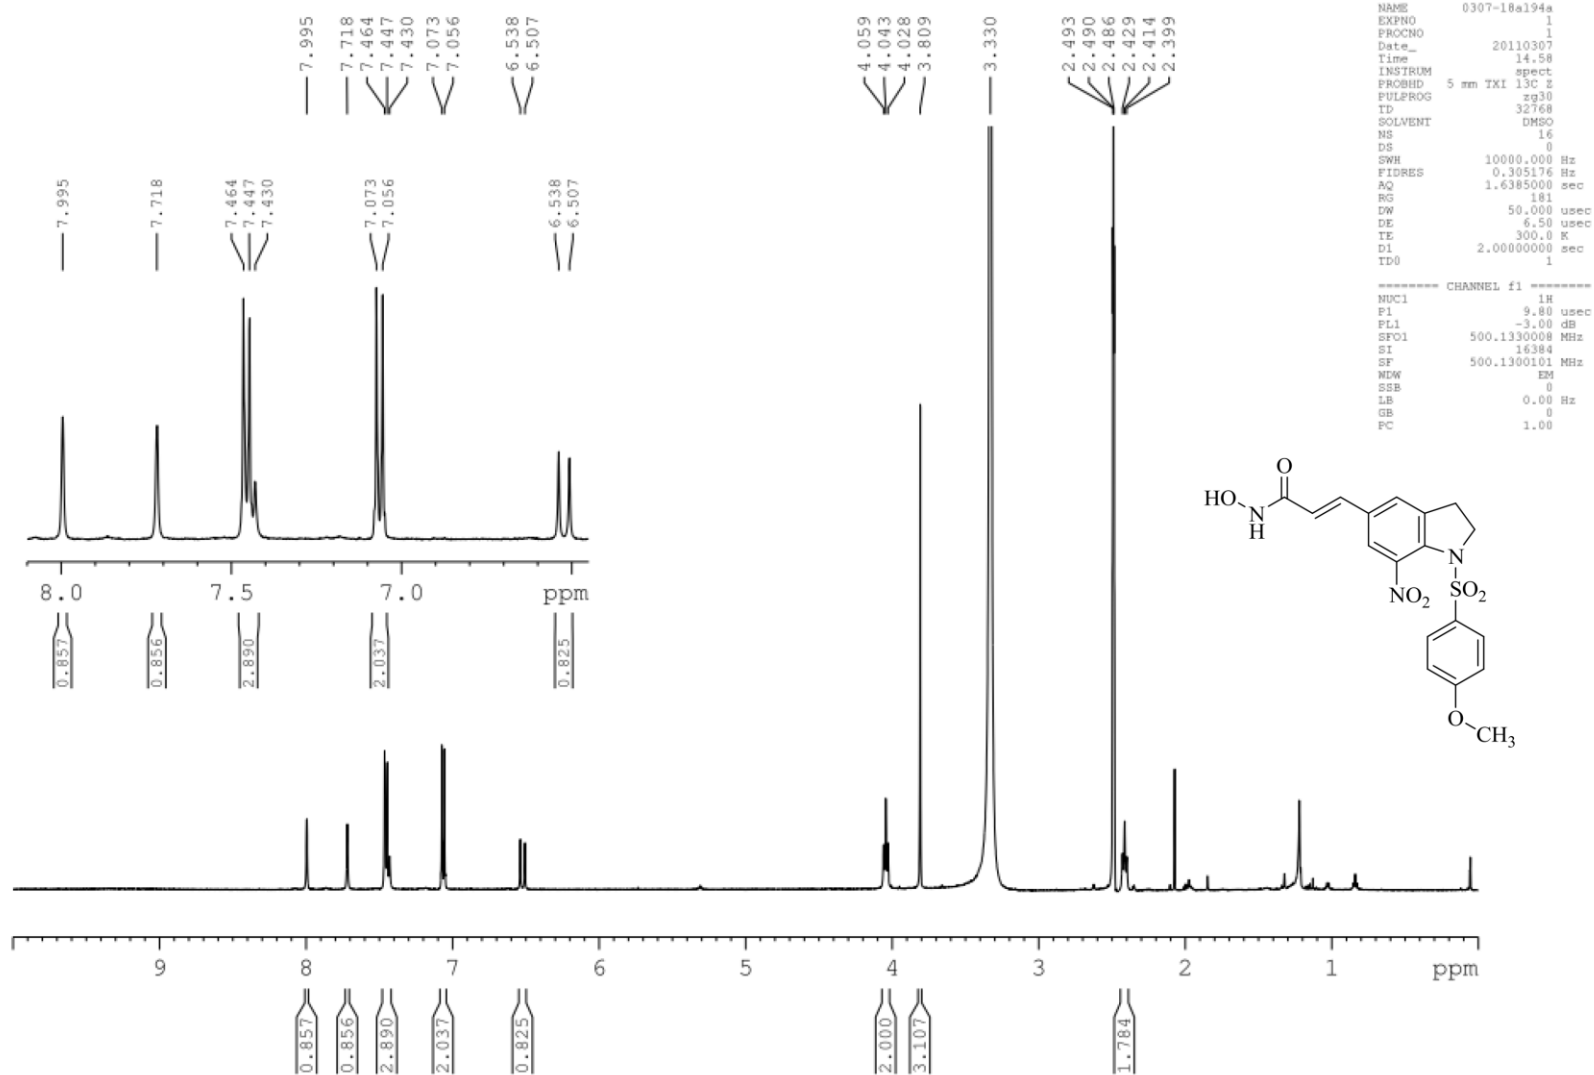

<sup>1</sup>H Spectrum for compound 11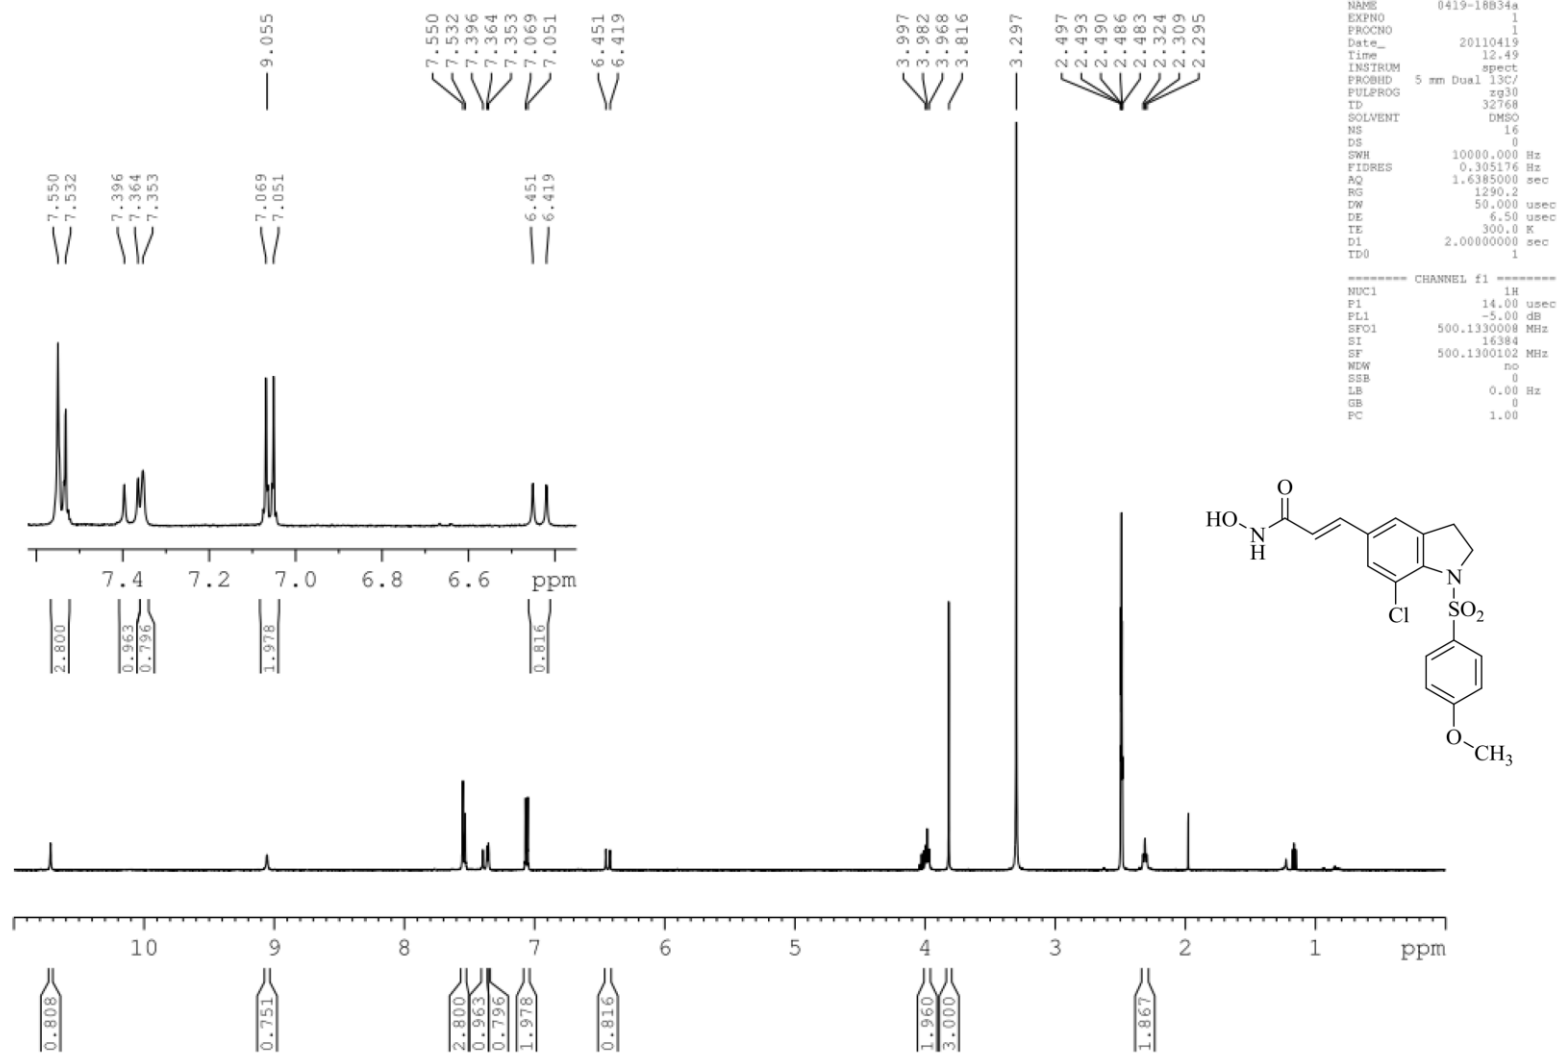

<sup>1</sup>H Spectrum for compound 12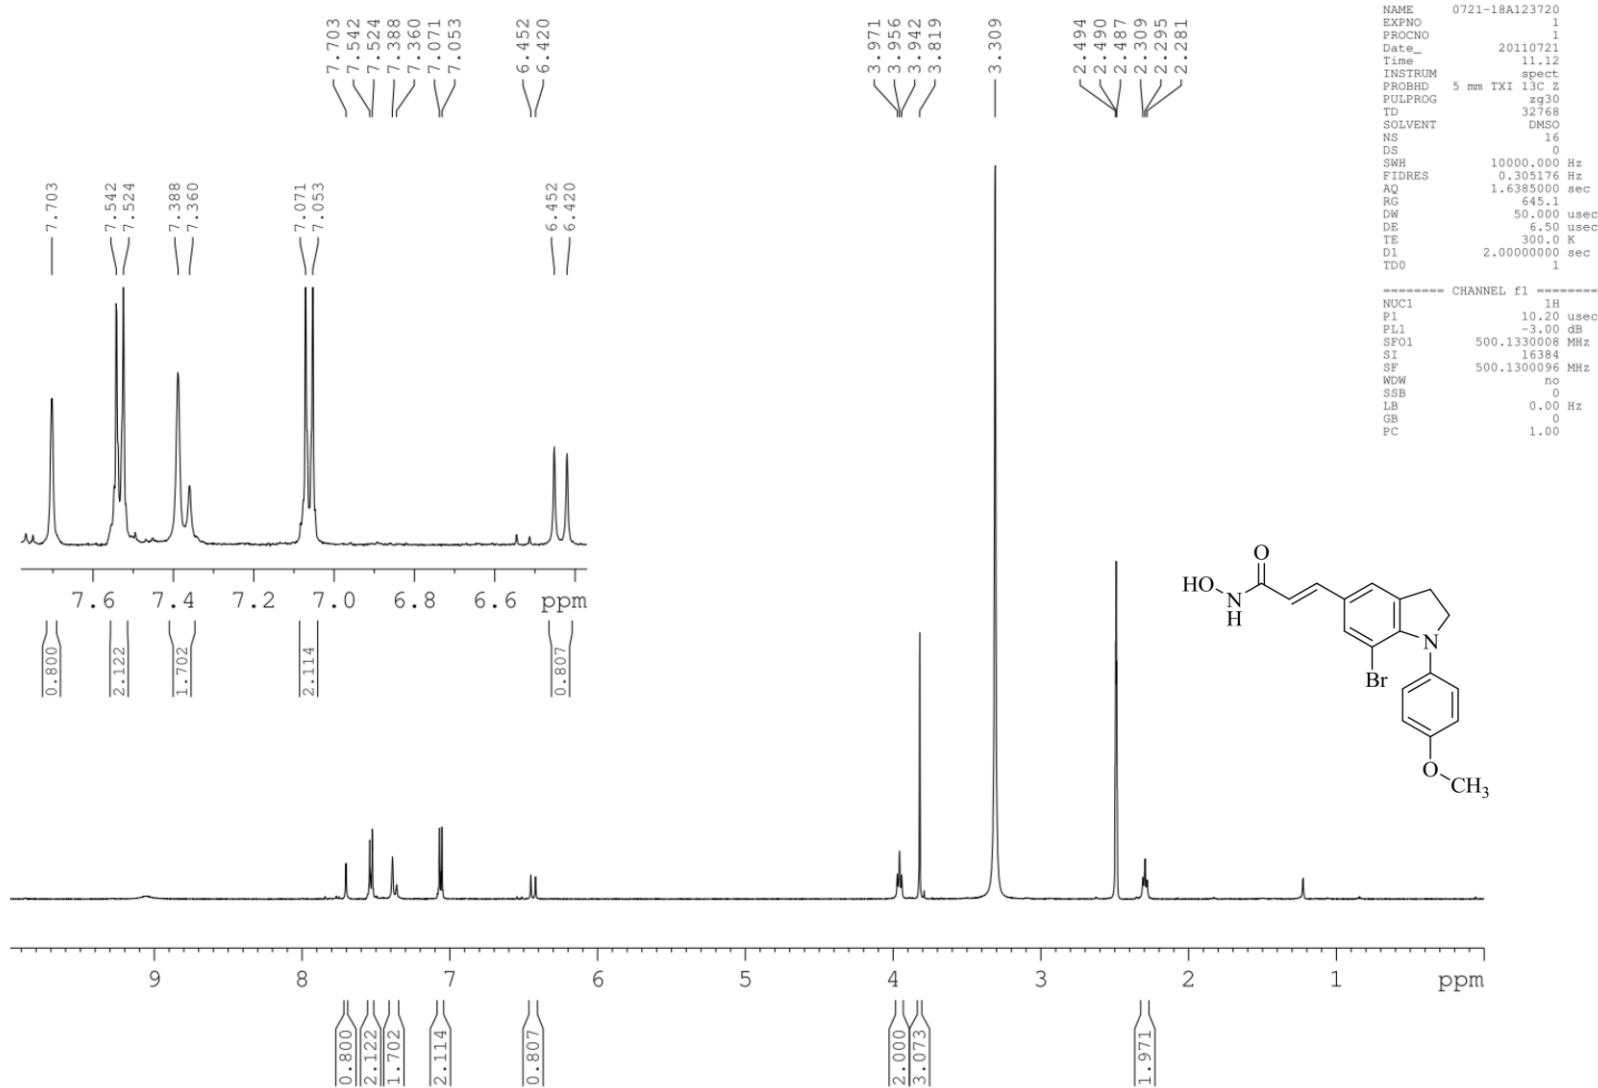

<sup>1</sup>H Spectrum for compound 13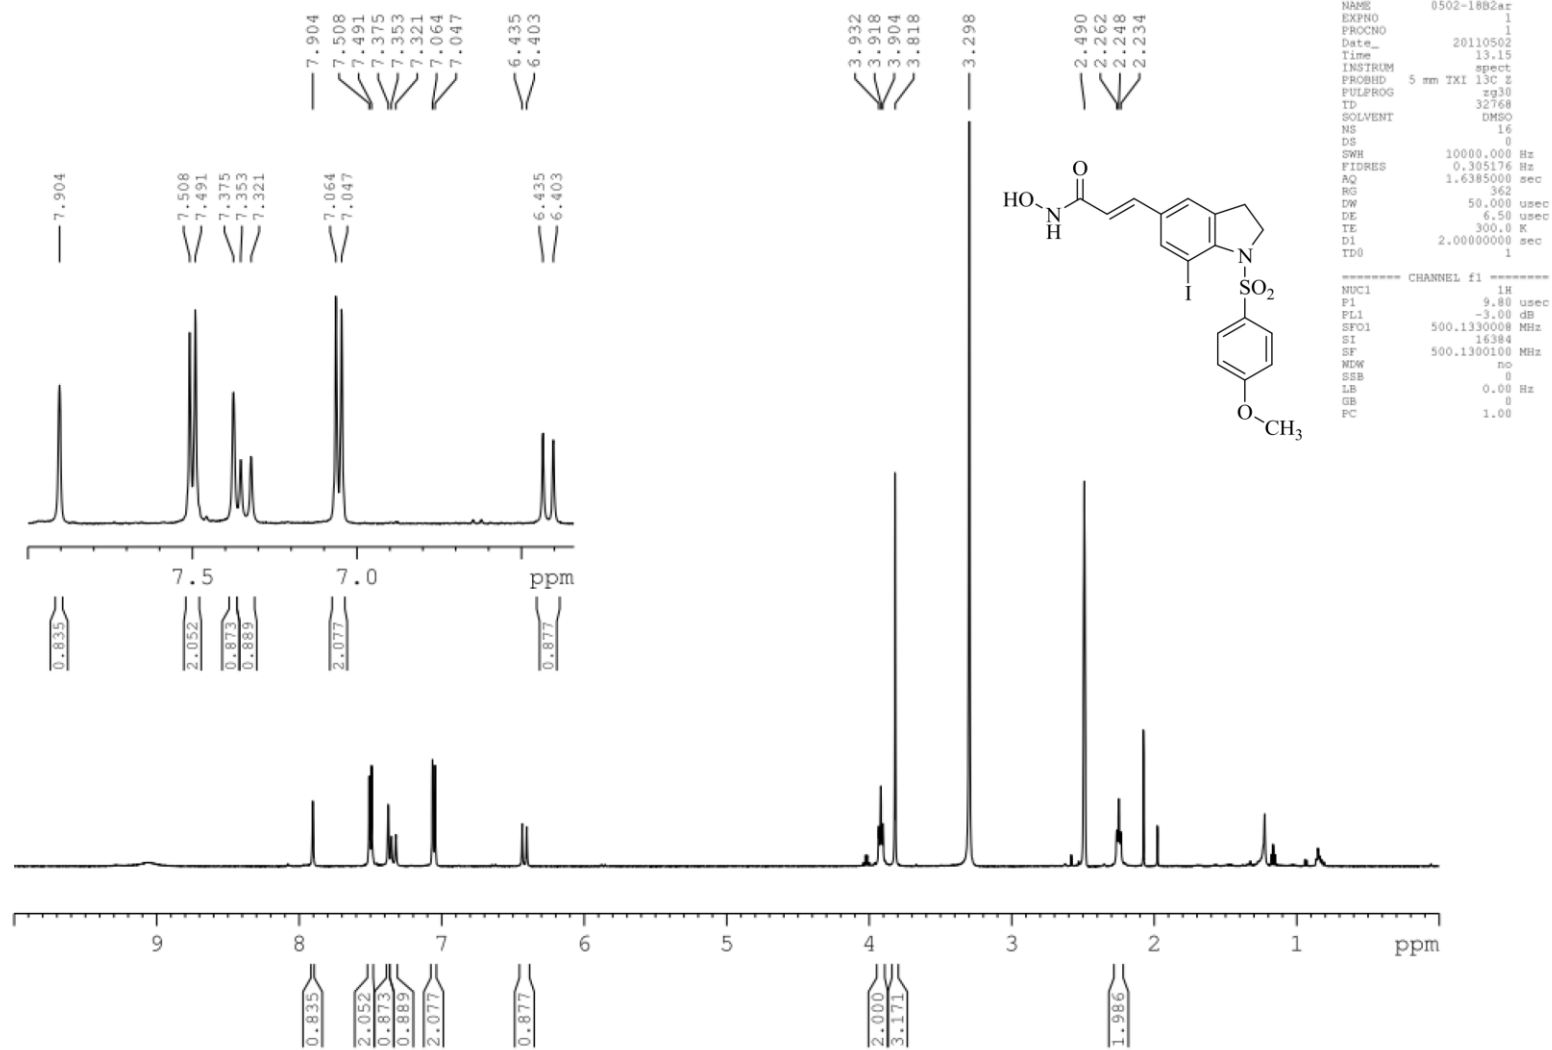

<sup>1</sup>H Spectrum for compound 14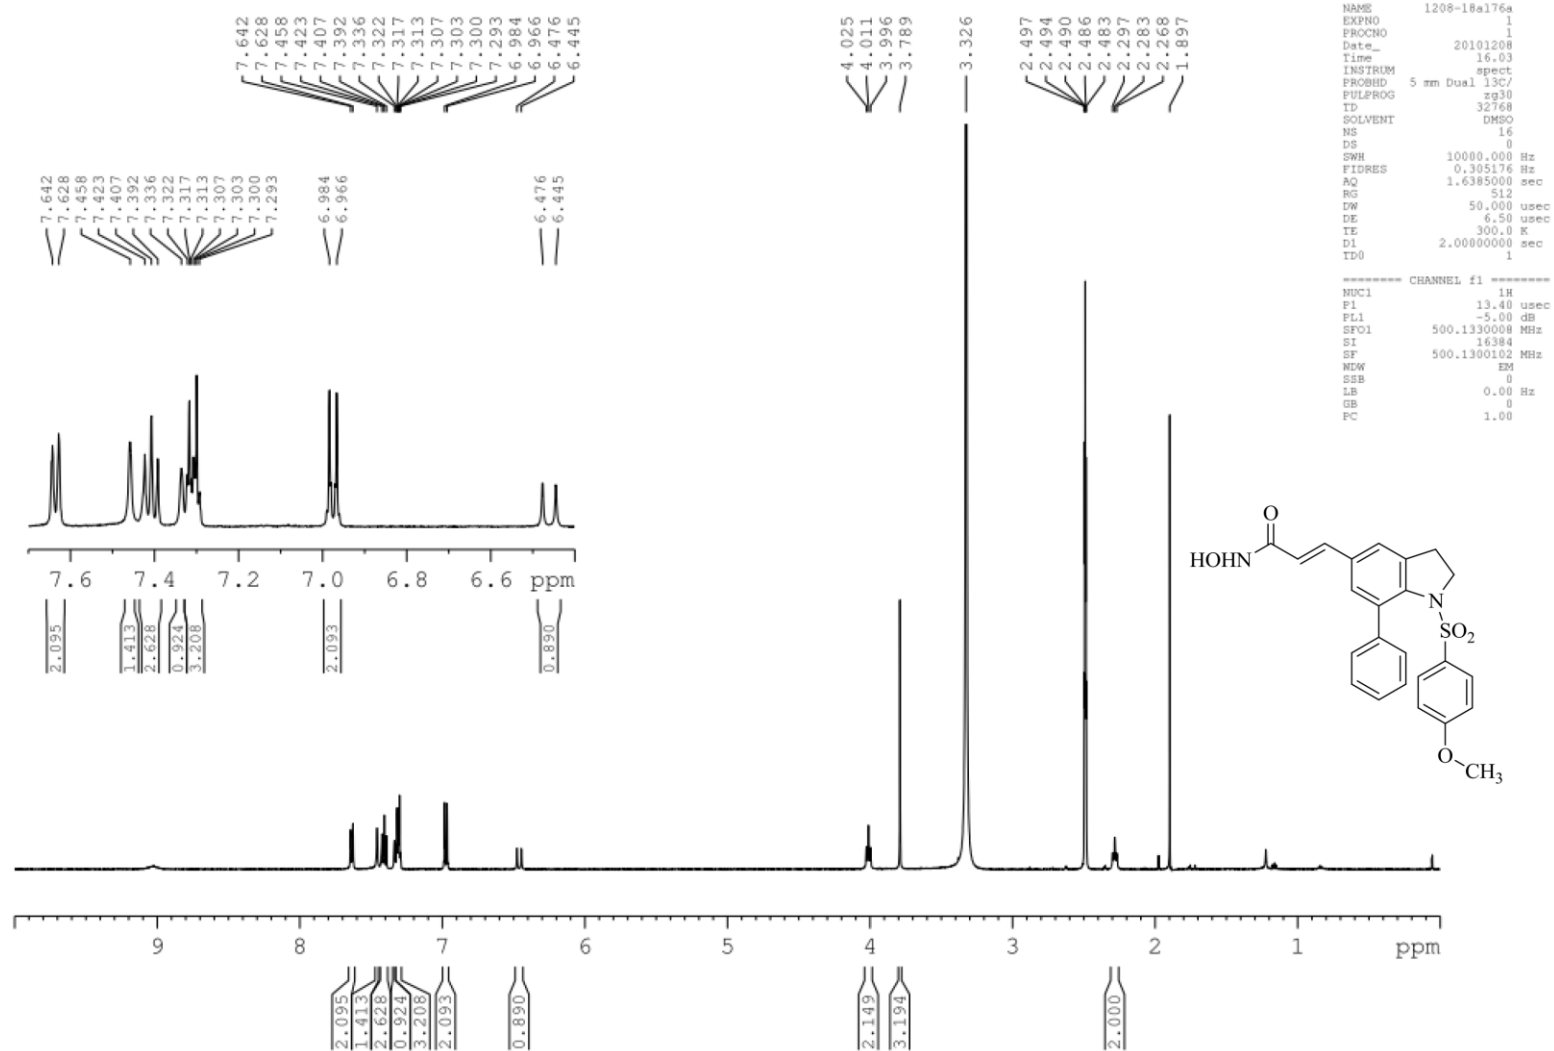

<sup>1</sup>H Spectrum for compound 15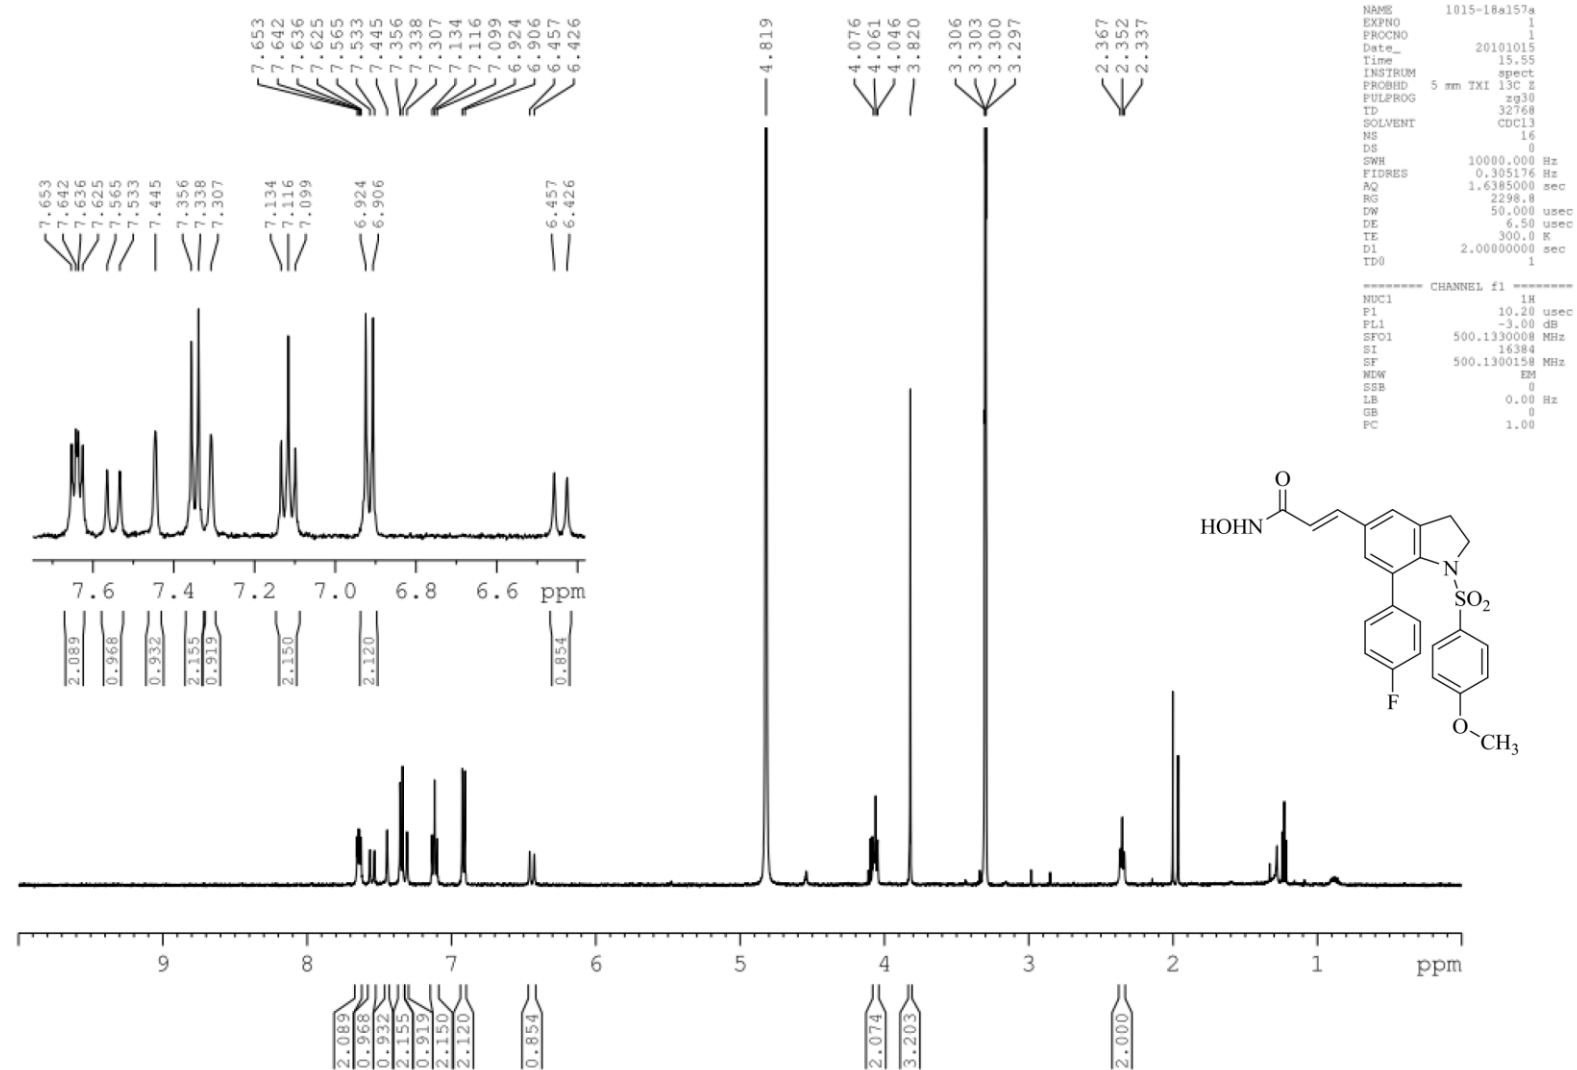

<sup>1</sup>H Spectrum for compound 16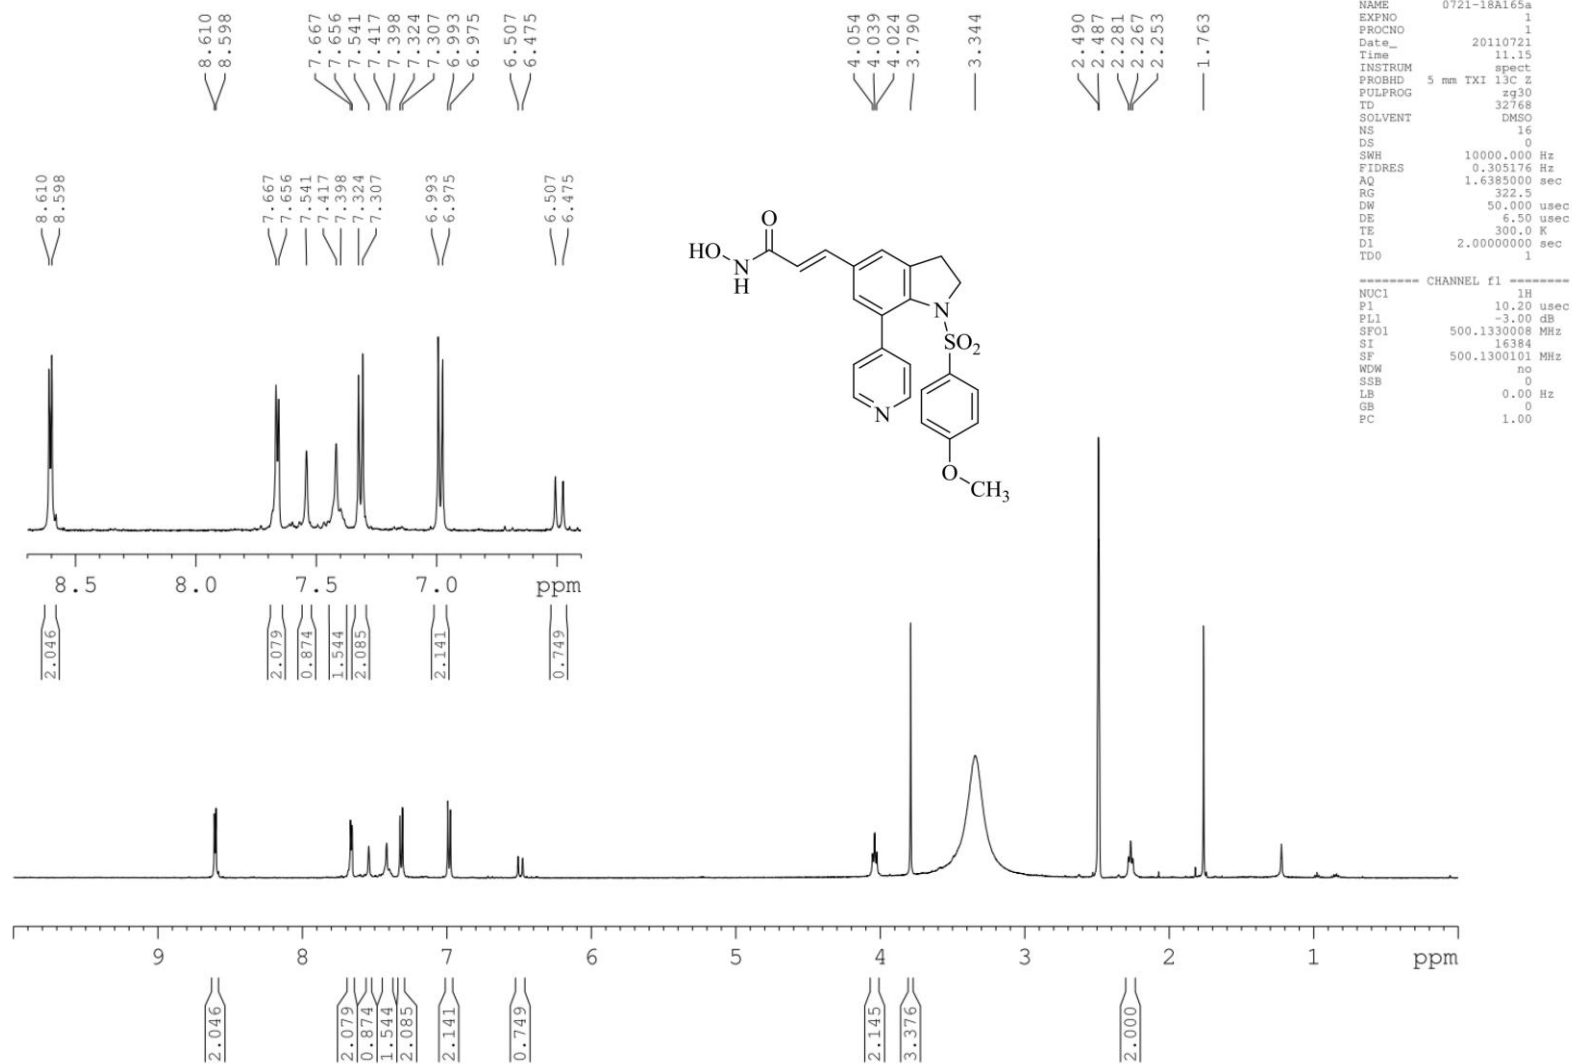

<sup>1</sup>H Spectrum for compound 17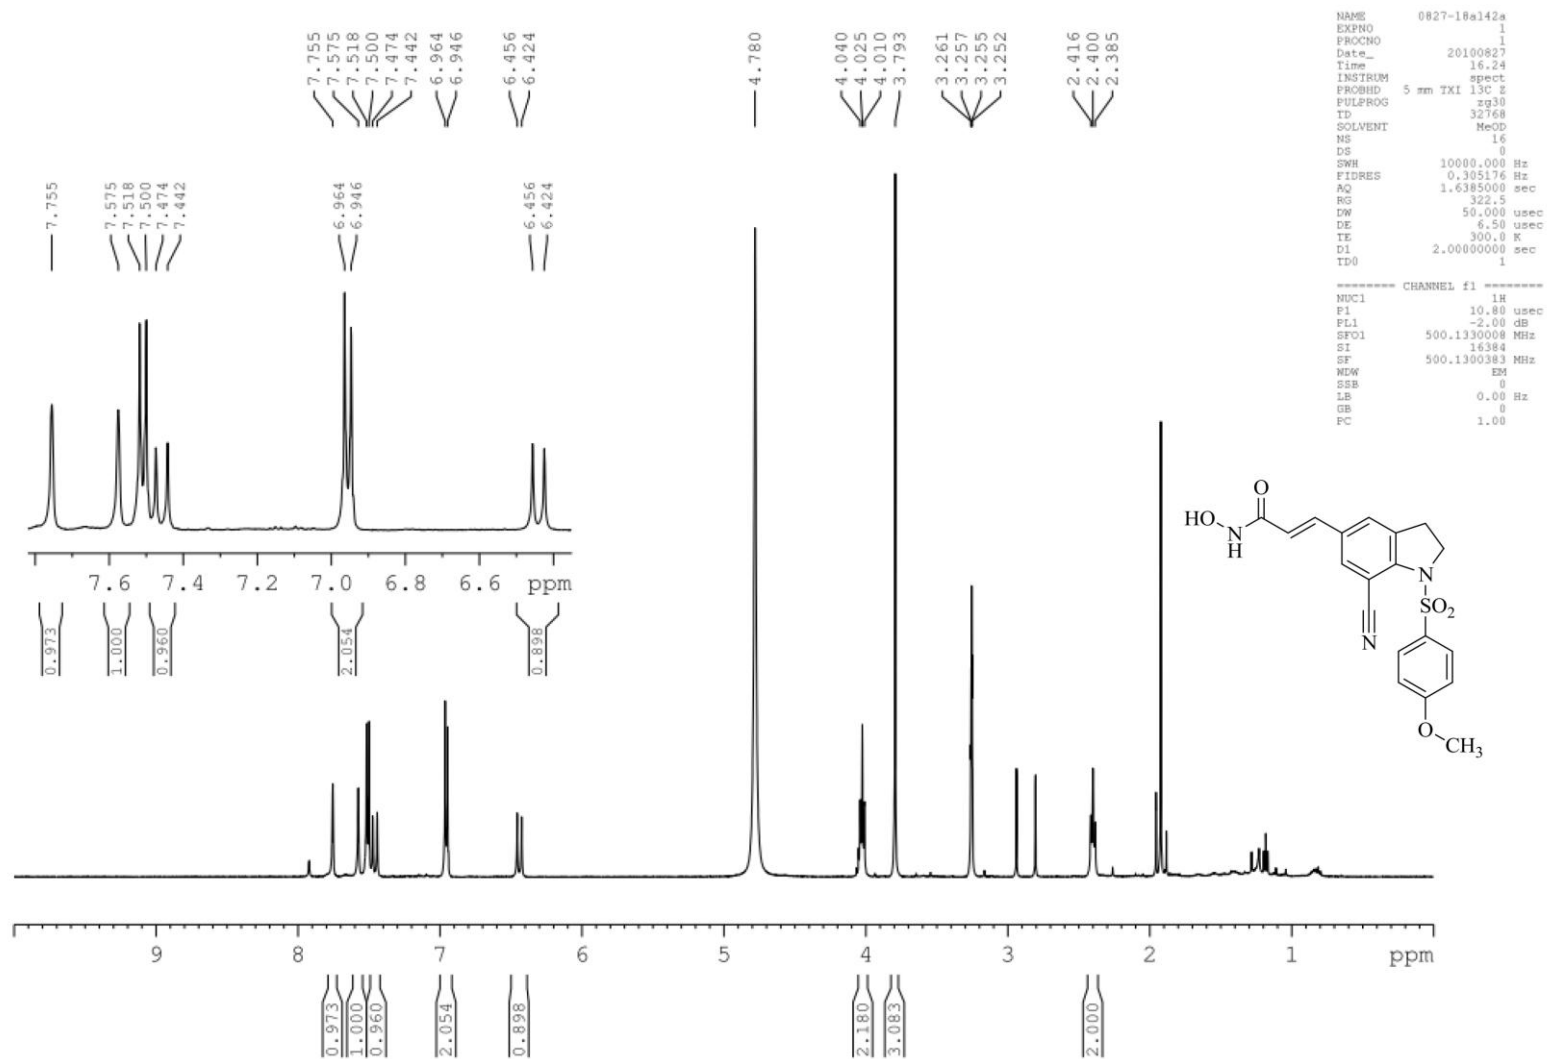

<sup>1</sup>H Spectrum for compound 18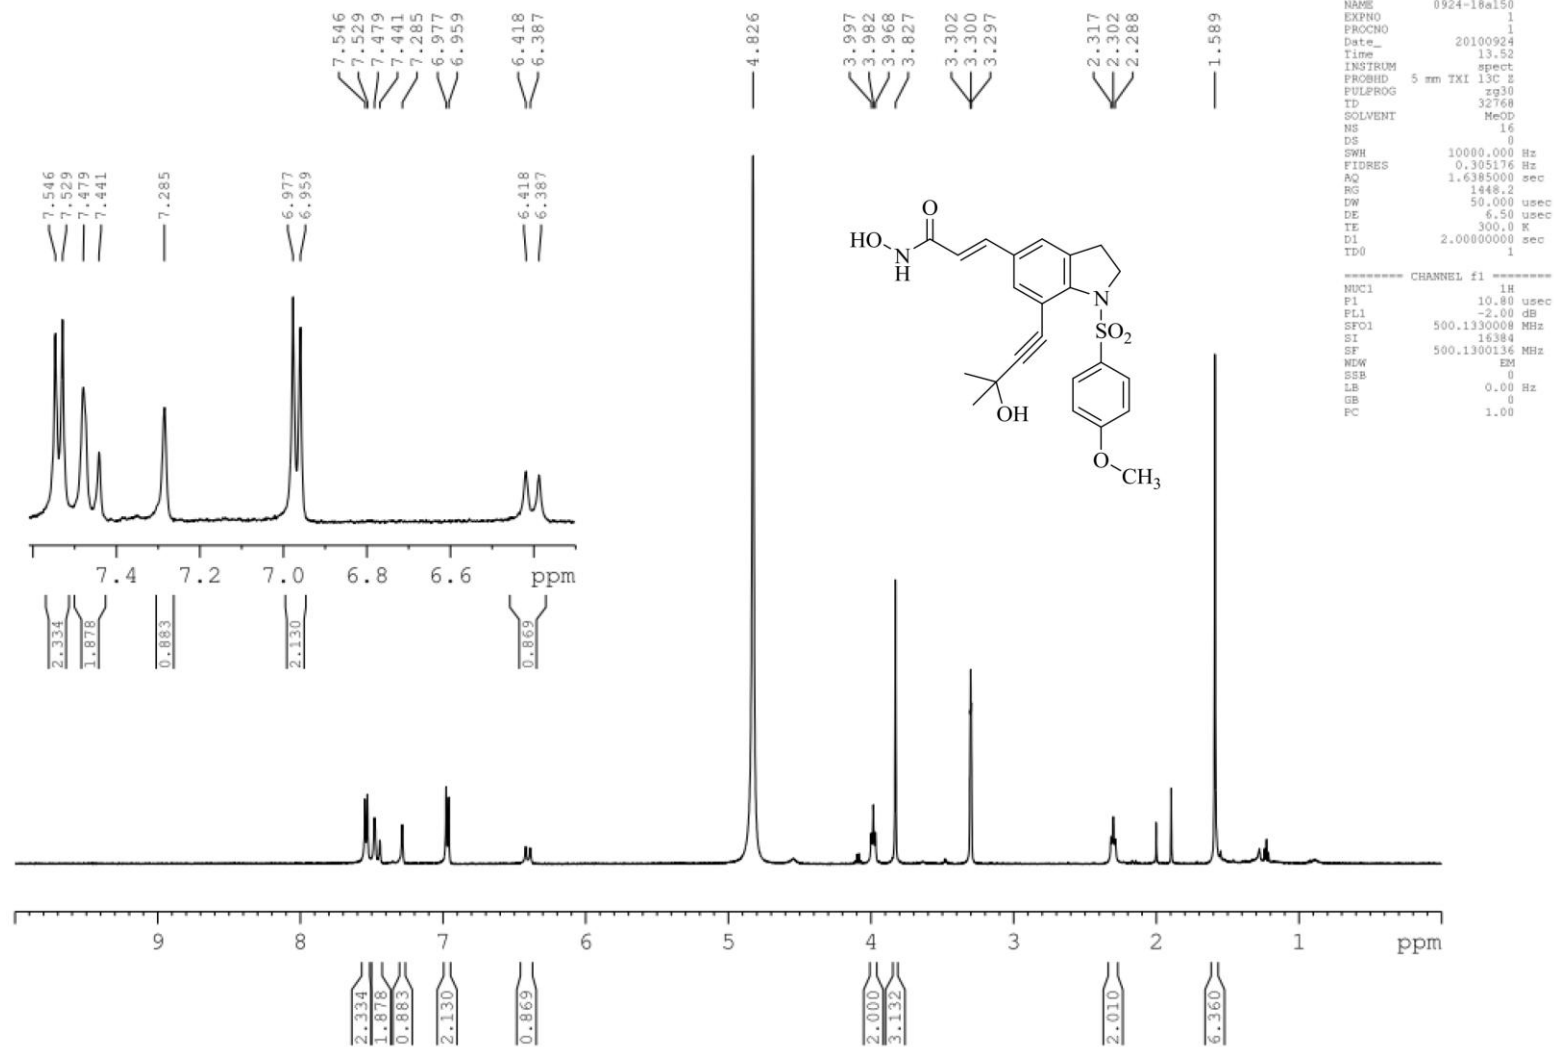

<sup>1</sup>H Spectrum for compound 19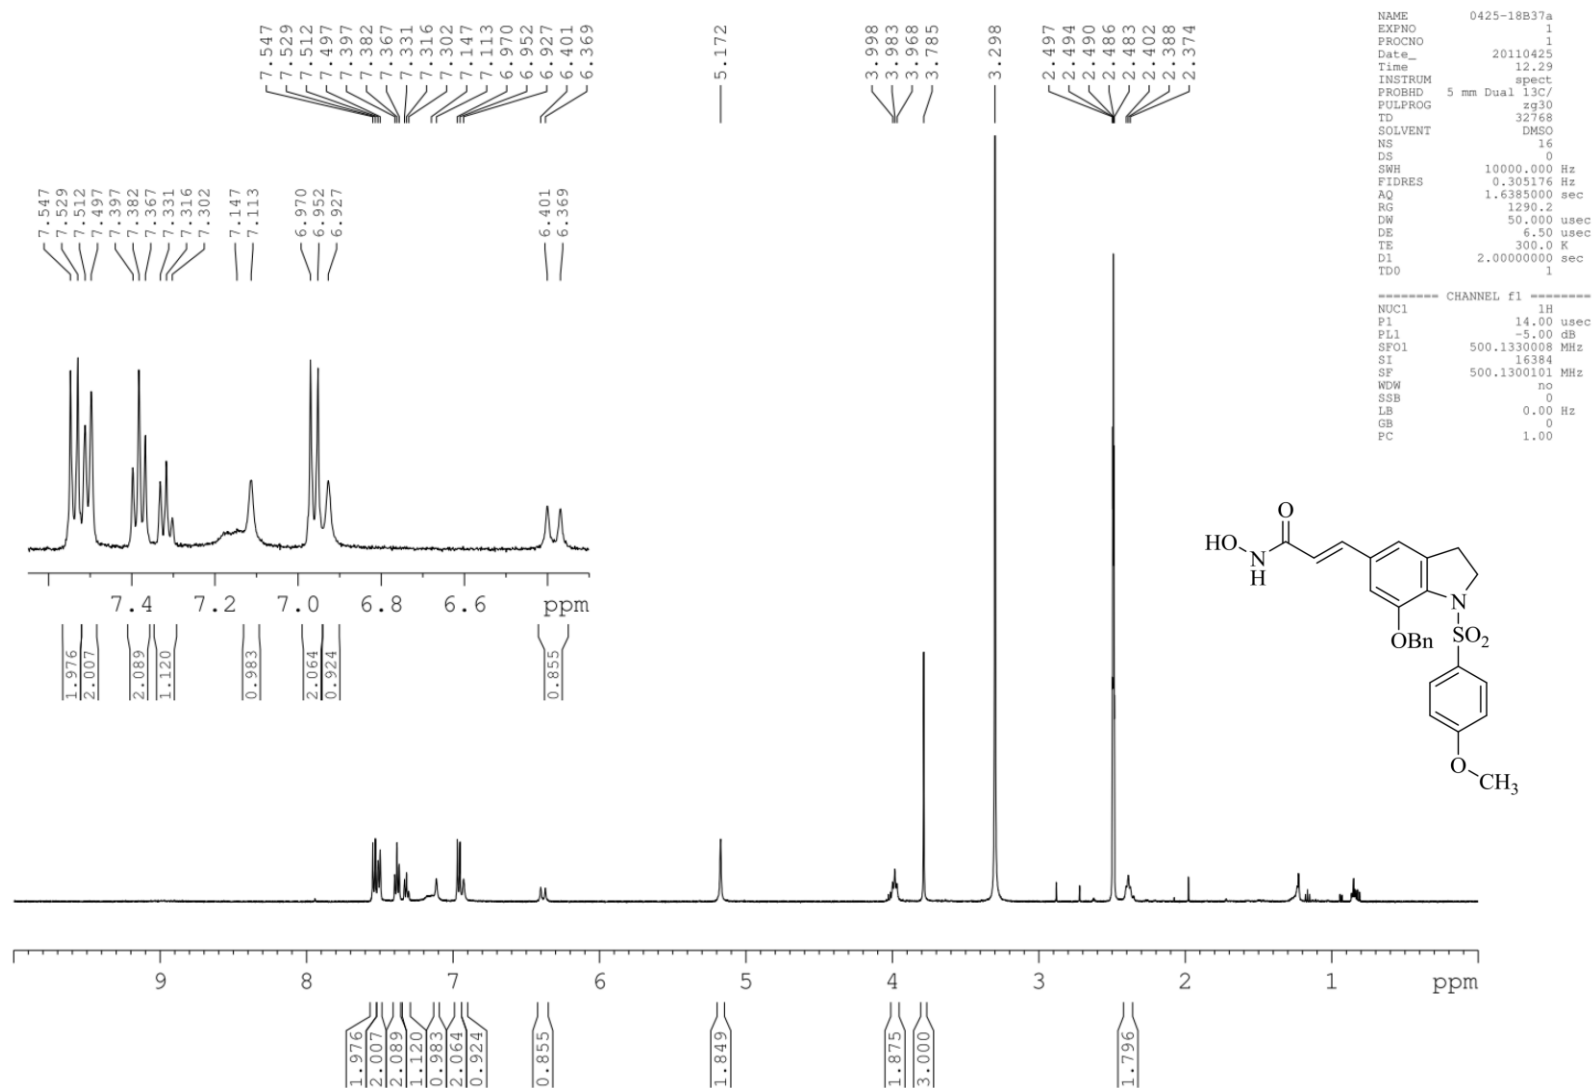

<sup>1</sup>H Spectrum for compound 21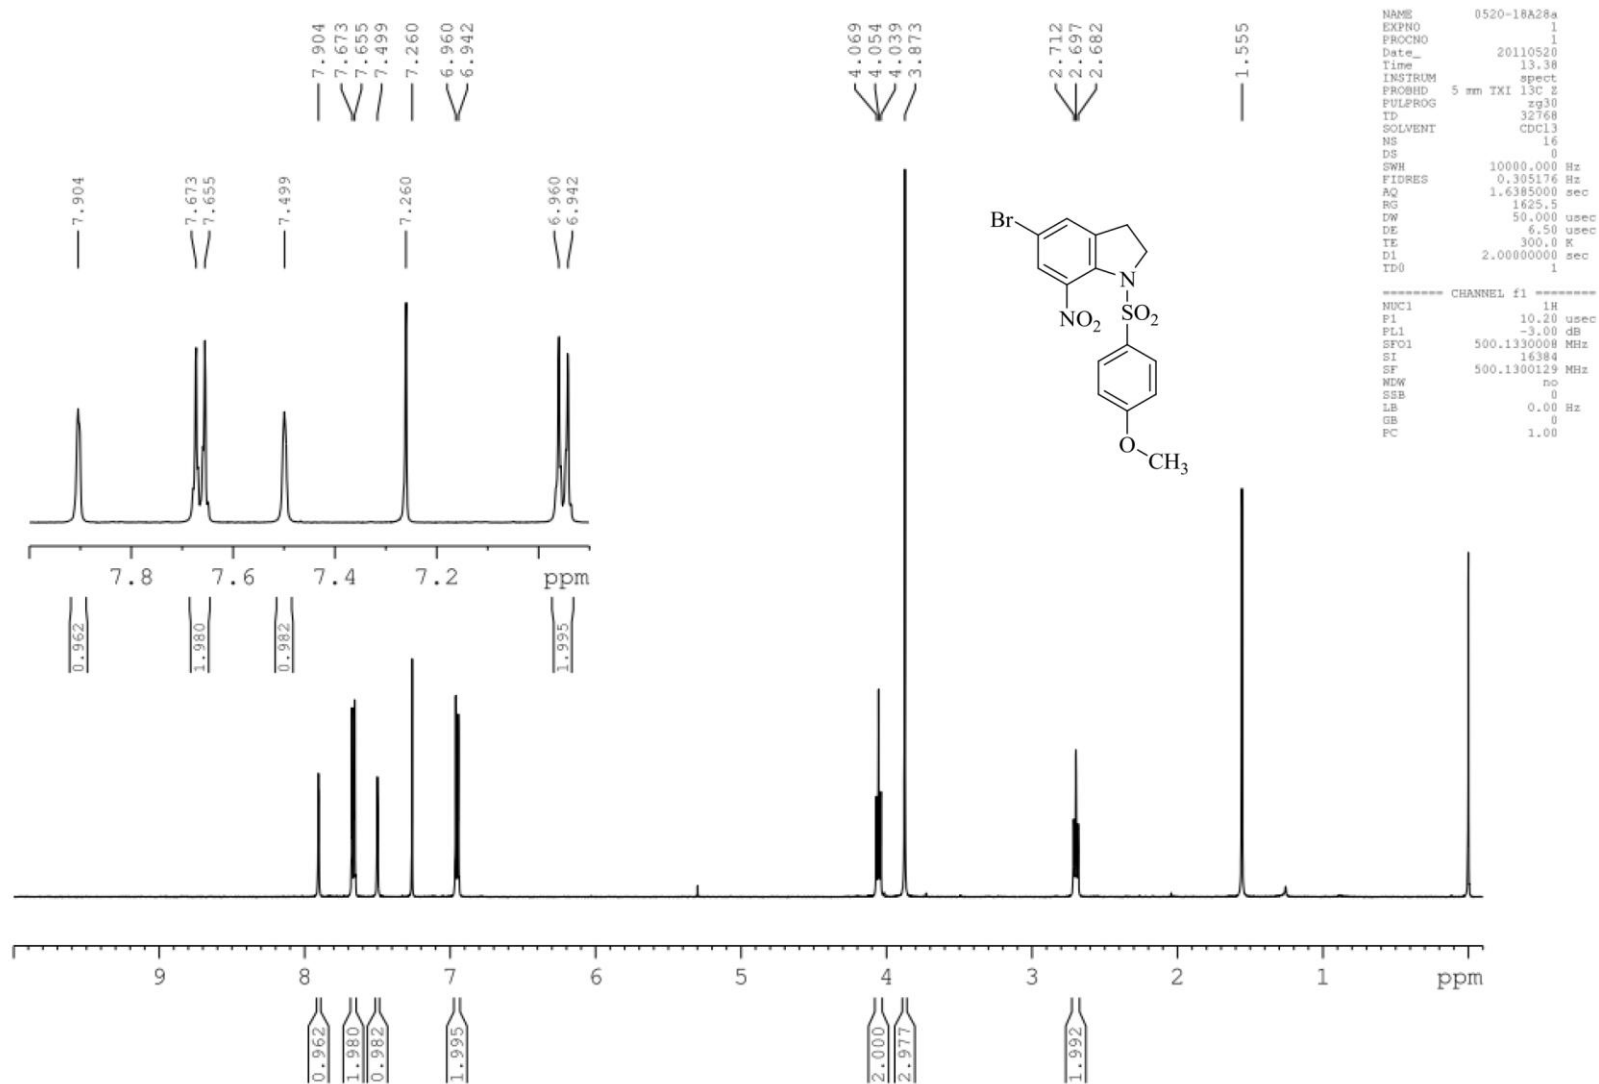

<sup>1</sup>H Spectrum for compound 22a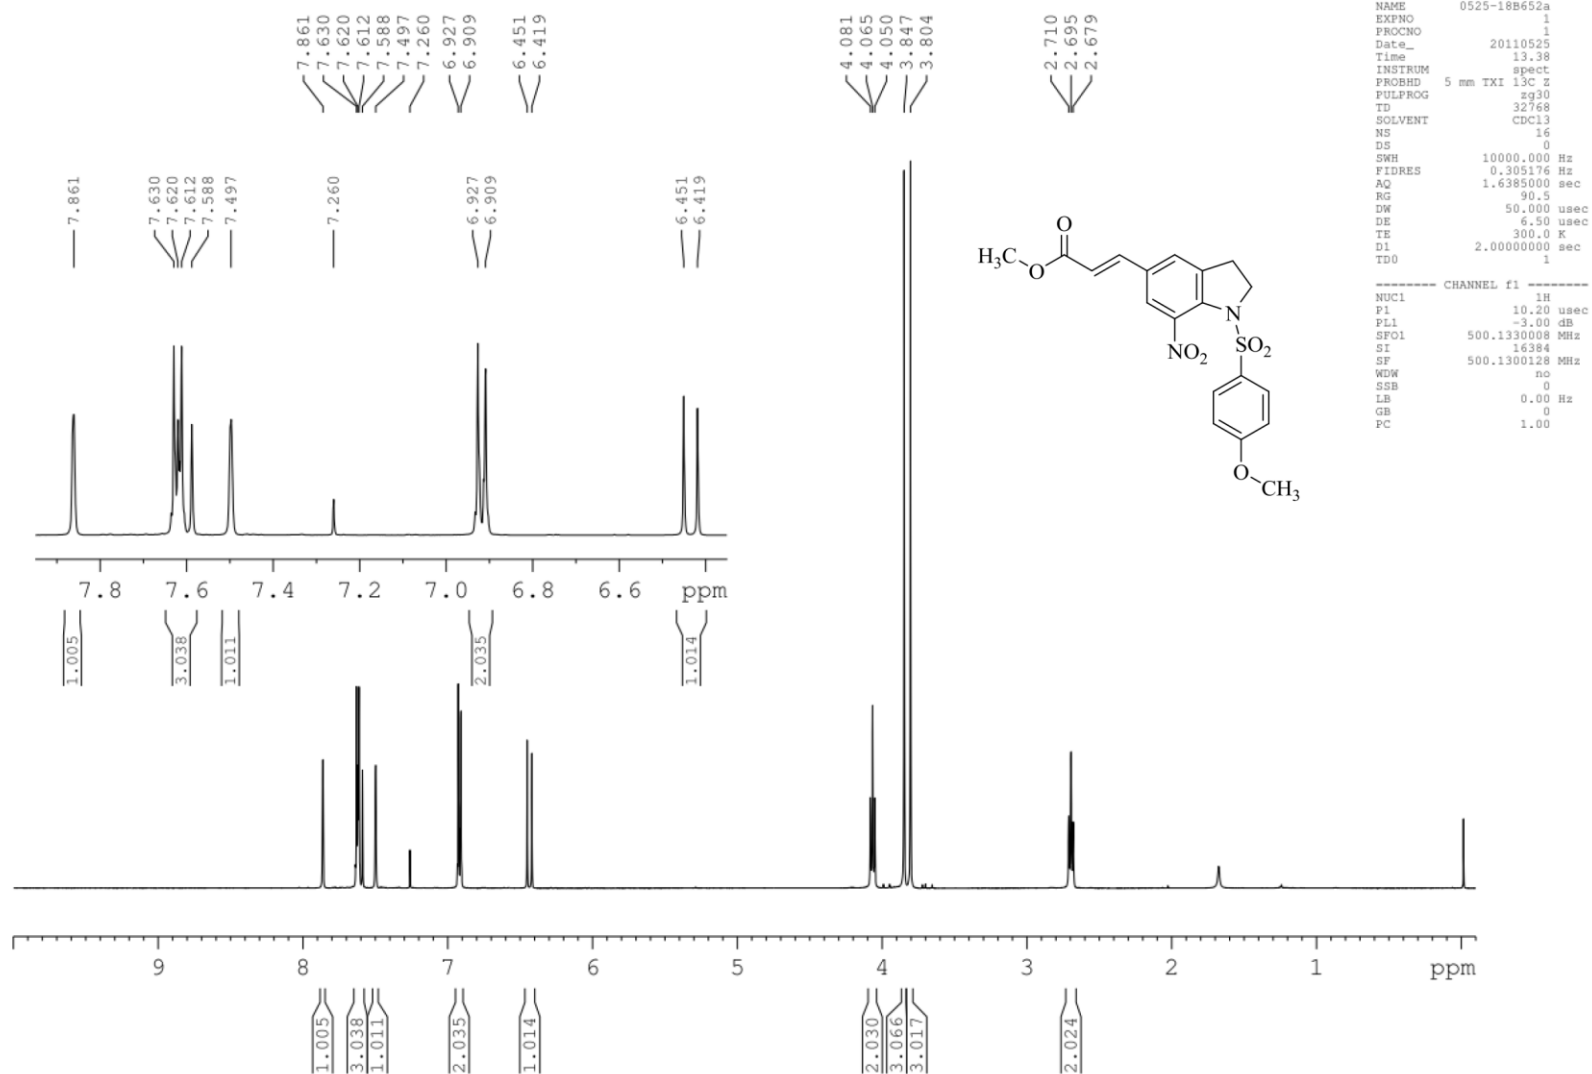

<sup>1</sup>H Spectrum for compound 22b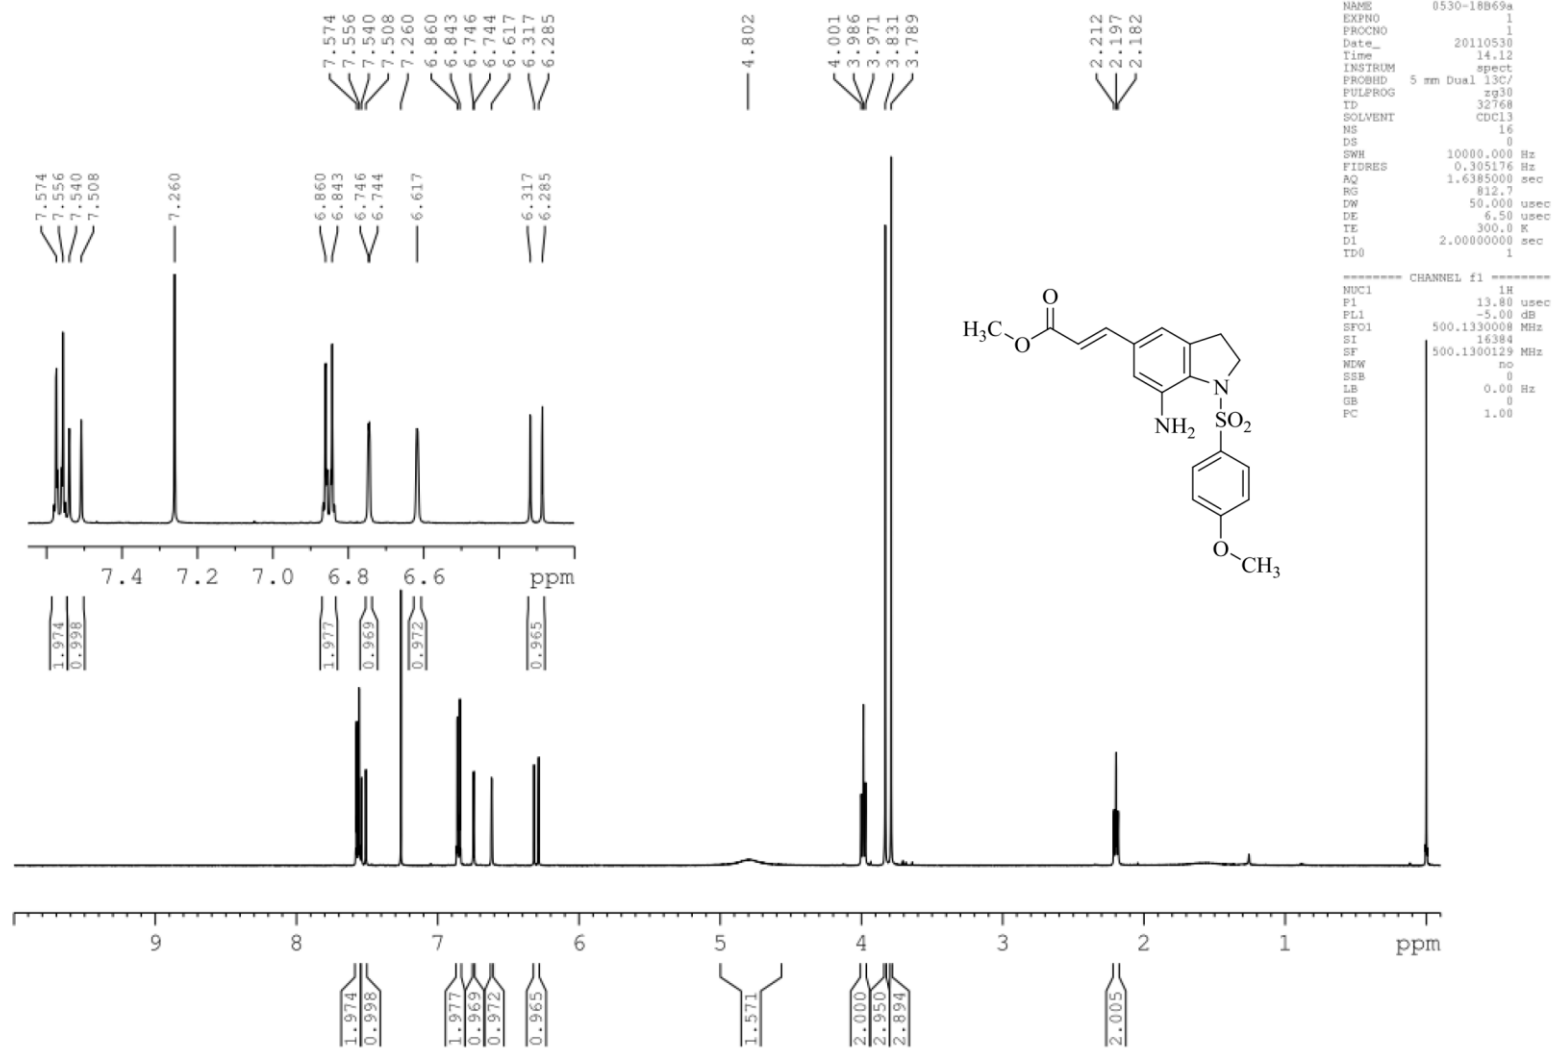

<sup>1</sup>H Spectrum for compound 22c

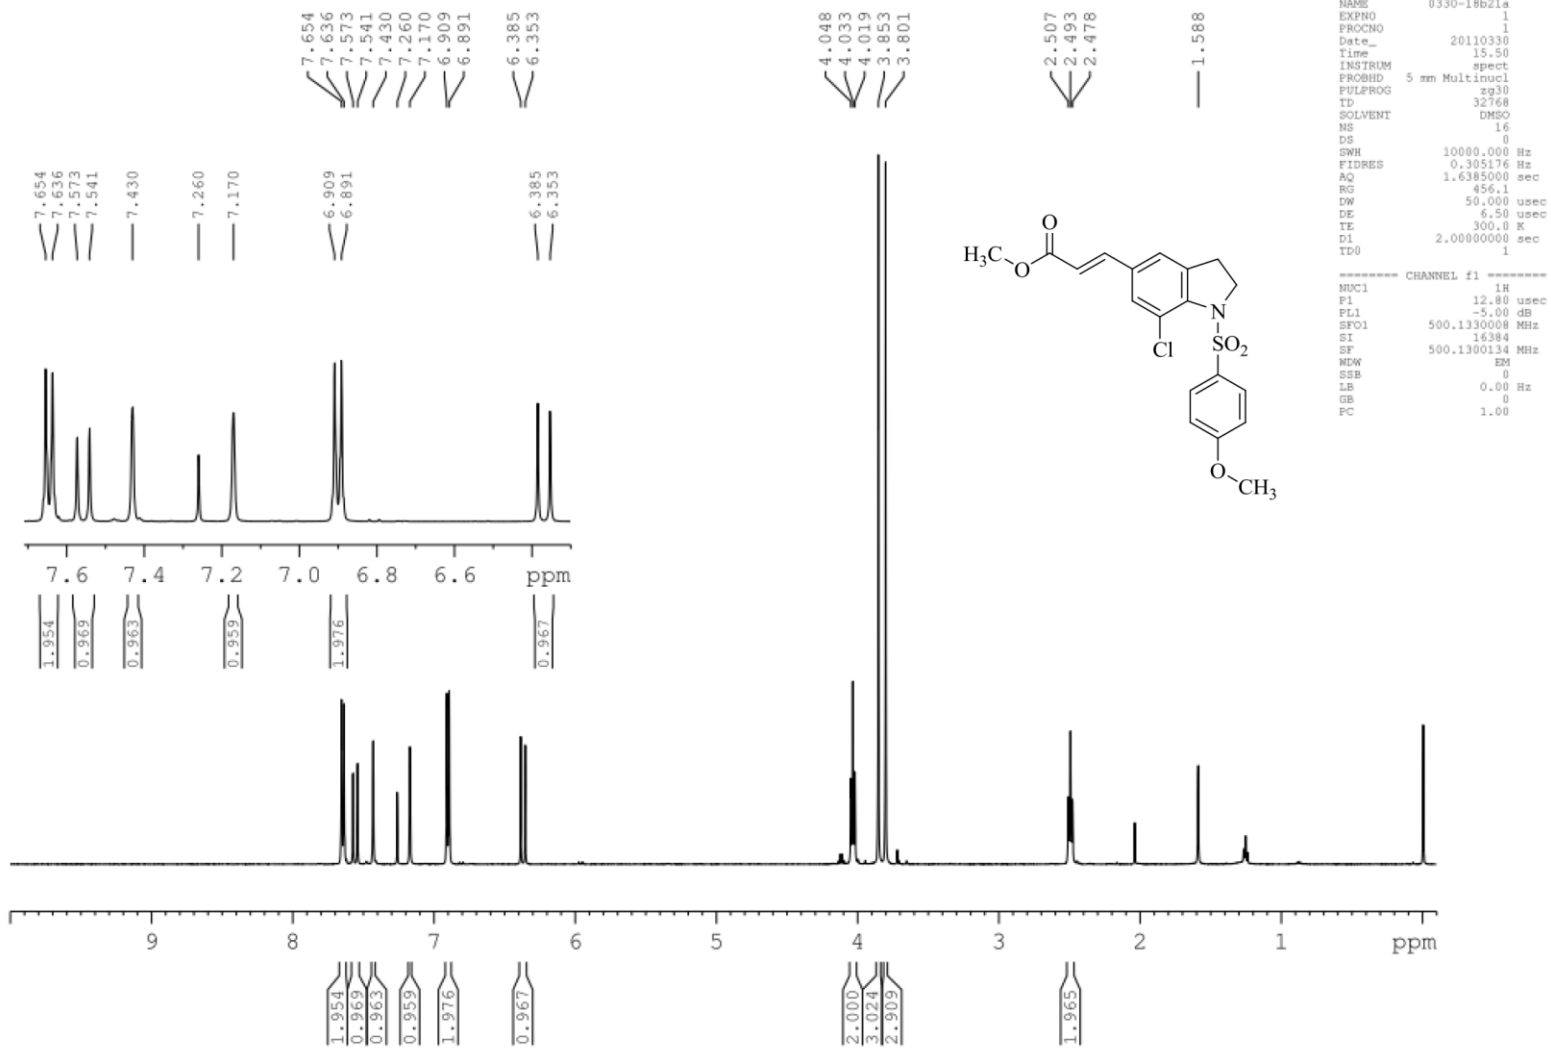

<sup>1</sup>H Spectrum for compound 22d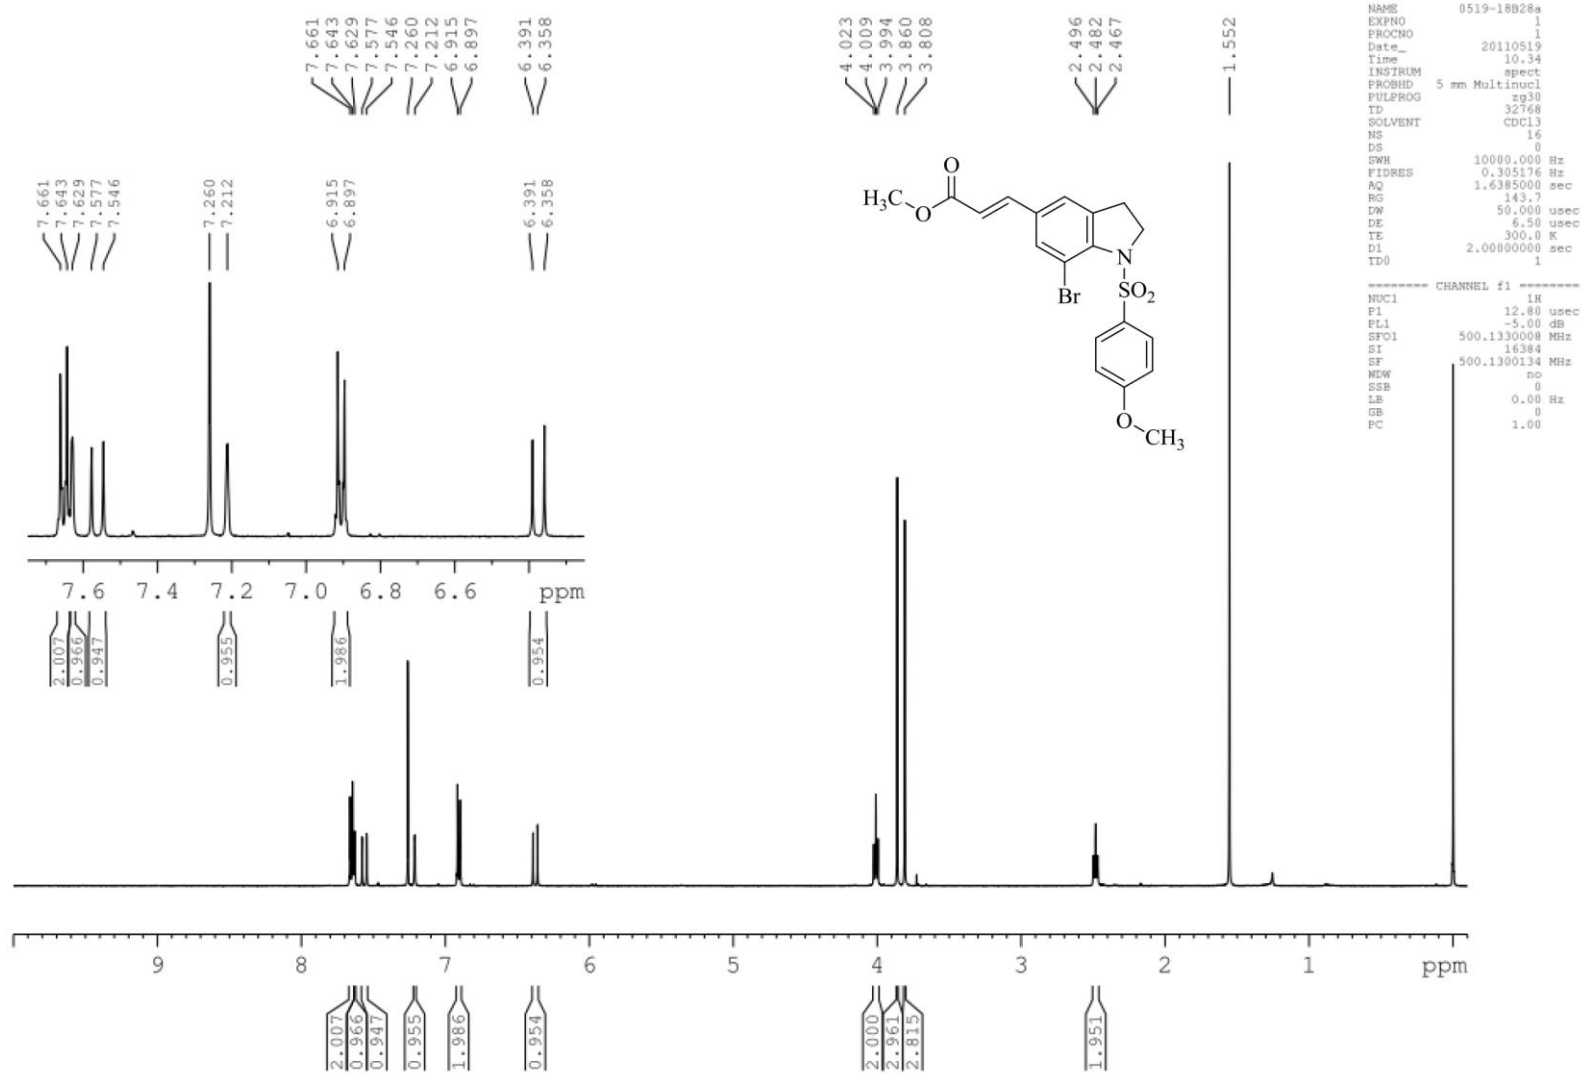

<sup>1</sup>H Spectrum for compound 22e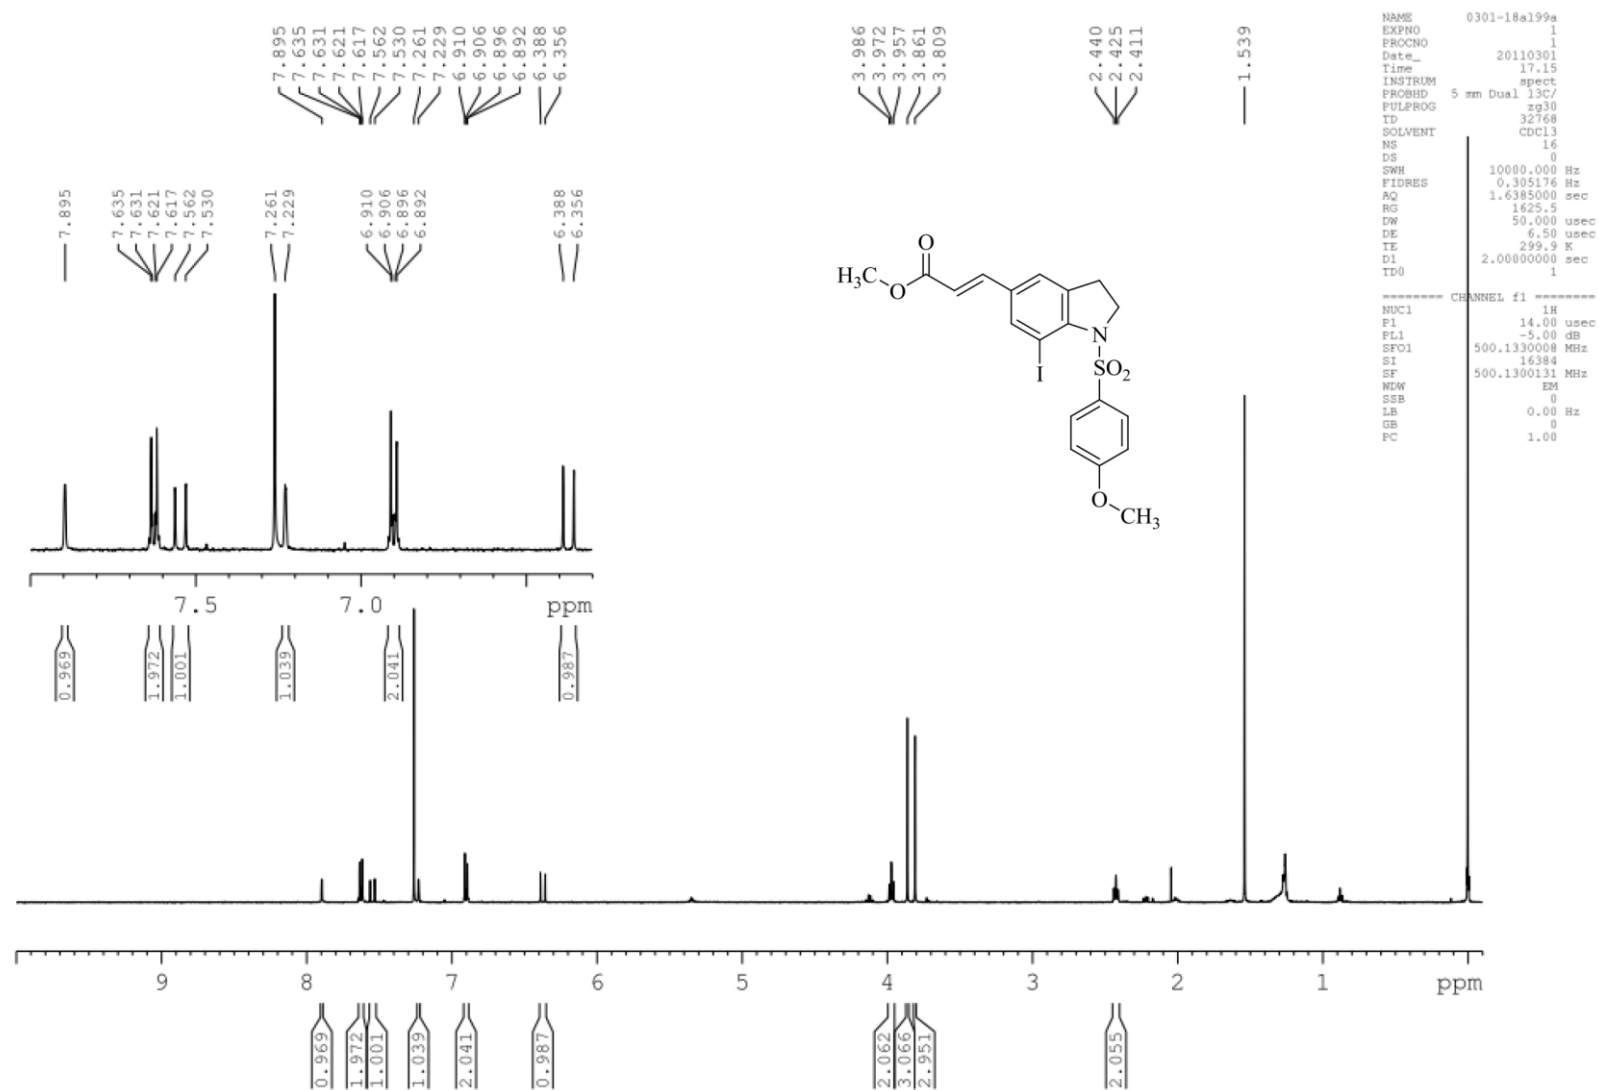

<sup>1</sup>H Spectrum for compound 22i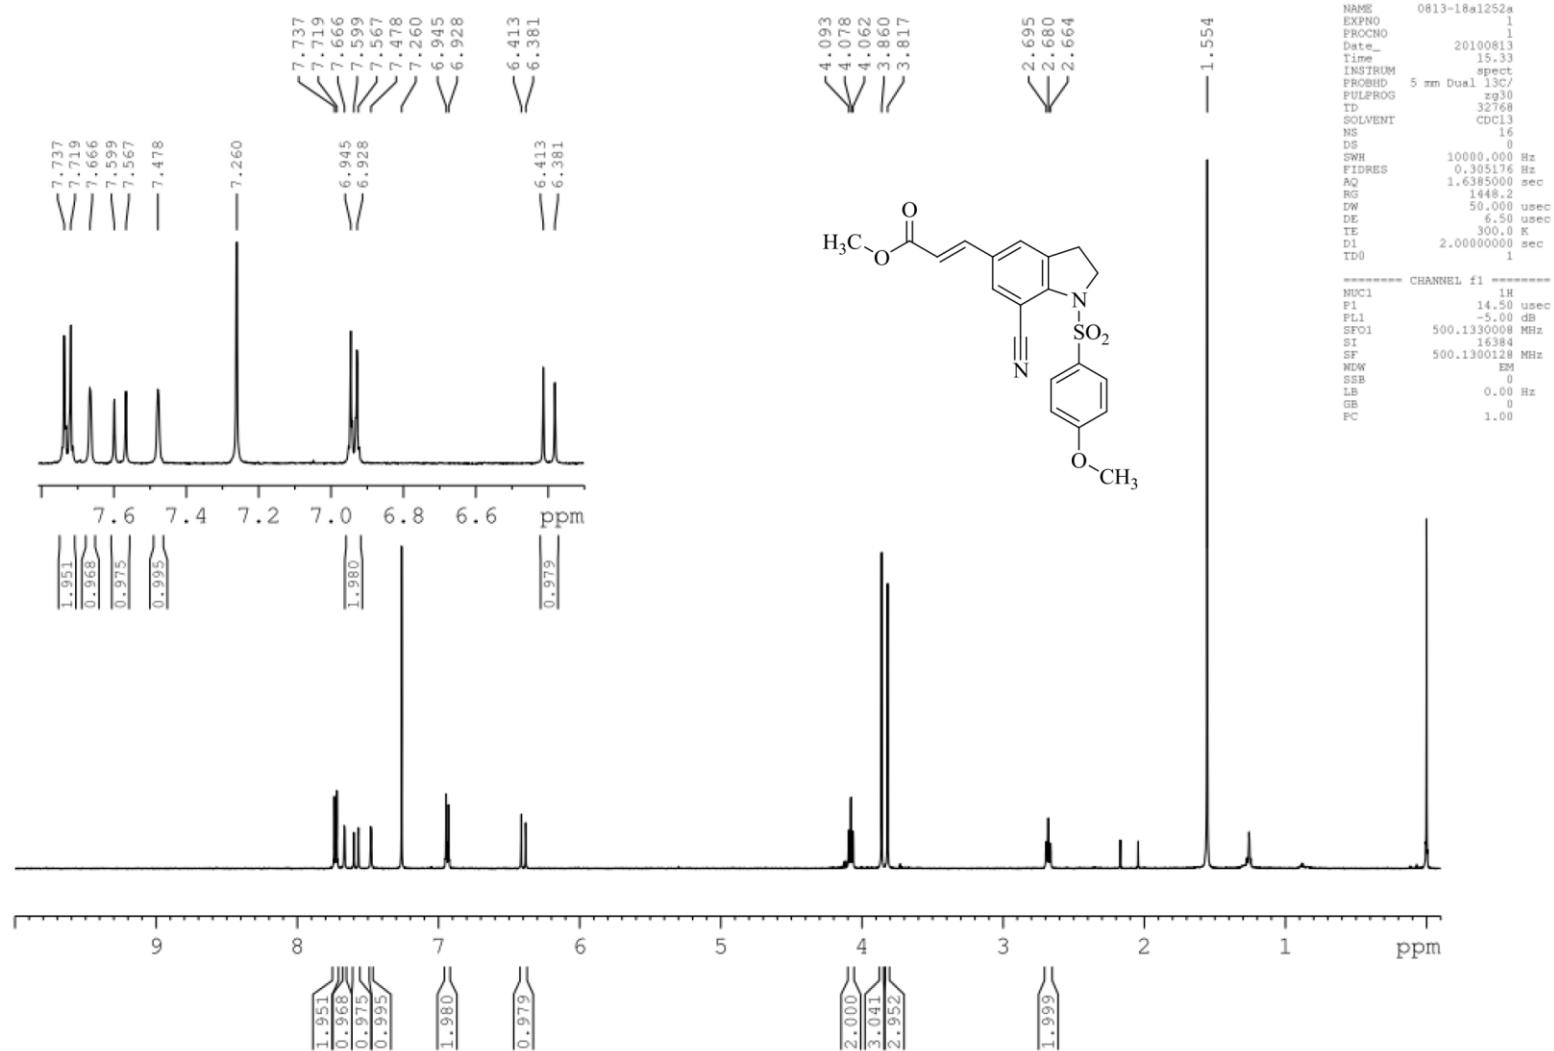

<sup>1</sup>H Spectrum for compound 22j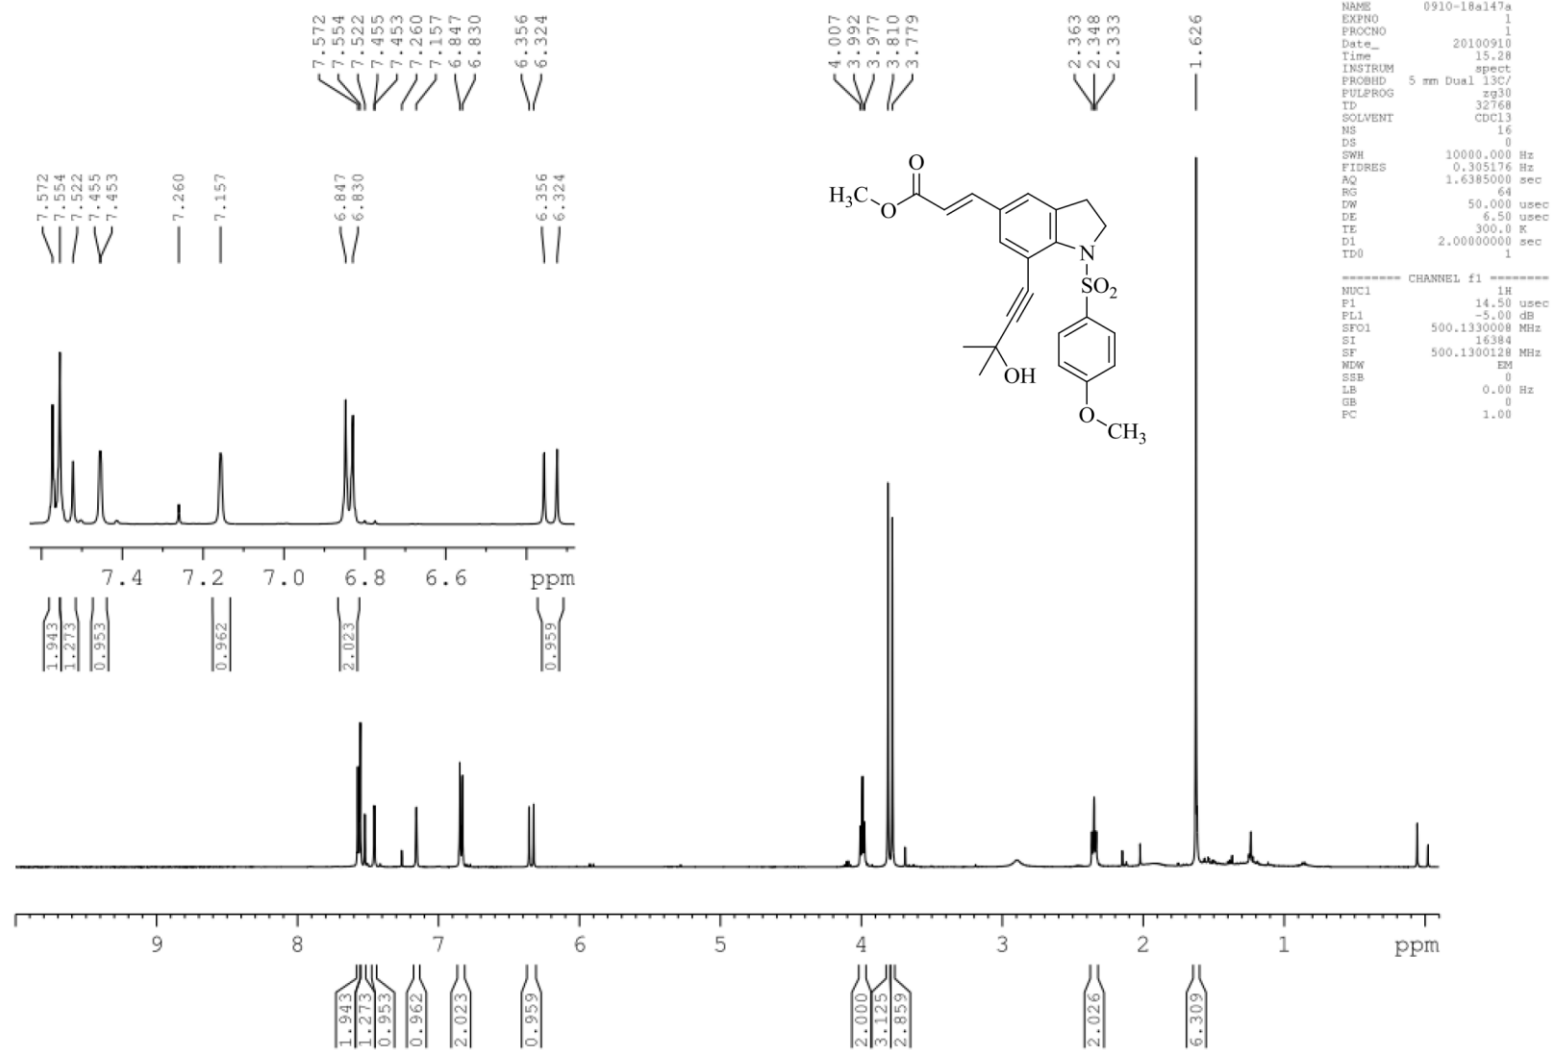

<sup>1</sup>H Spectrum for compound 22k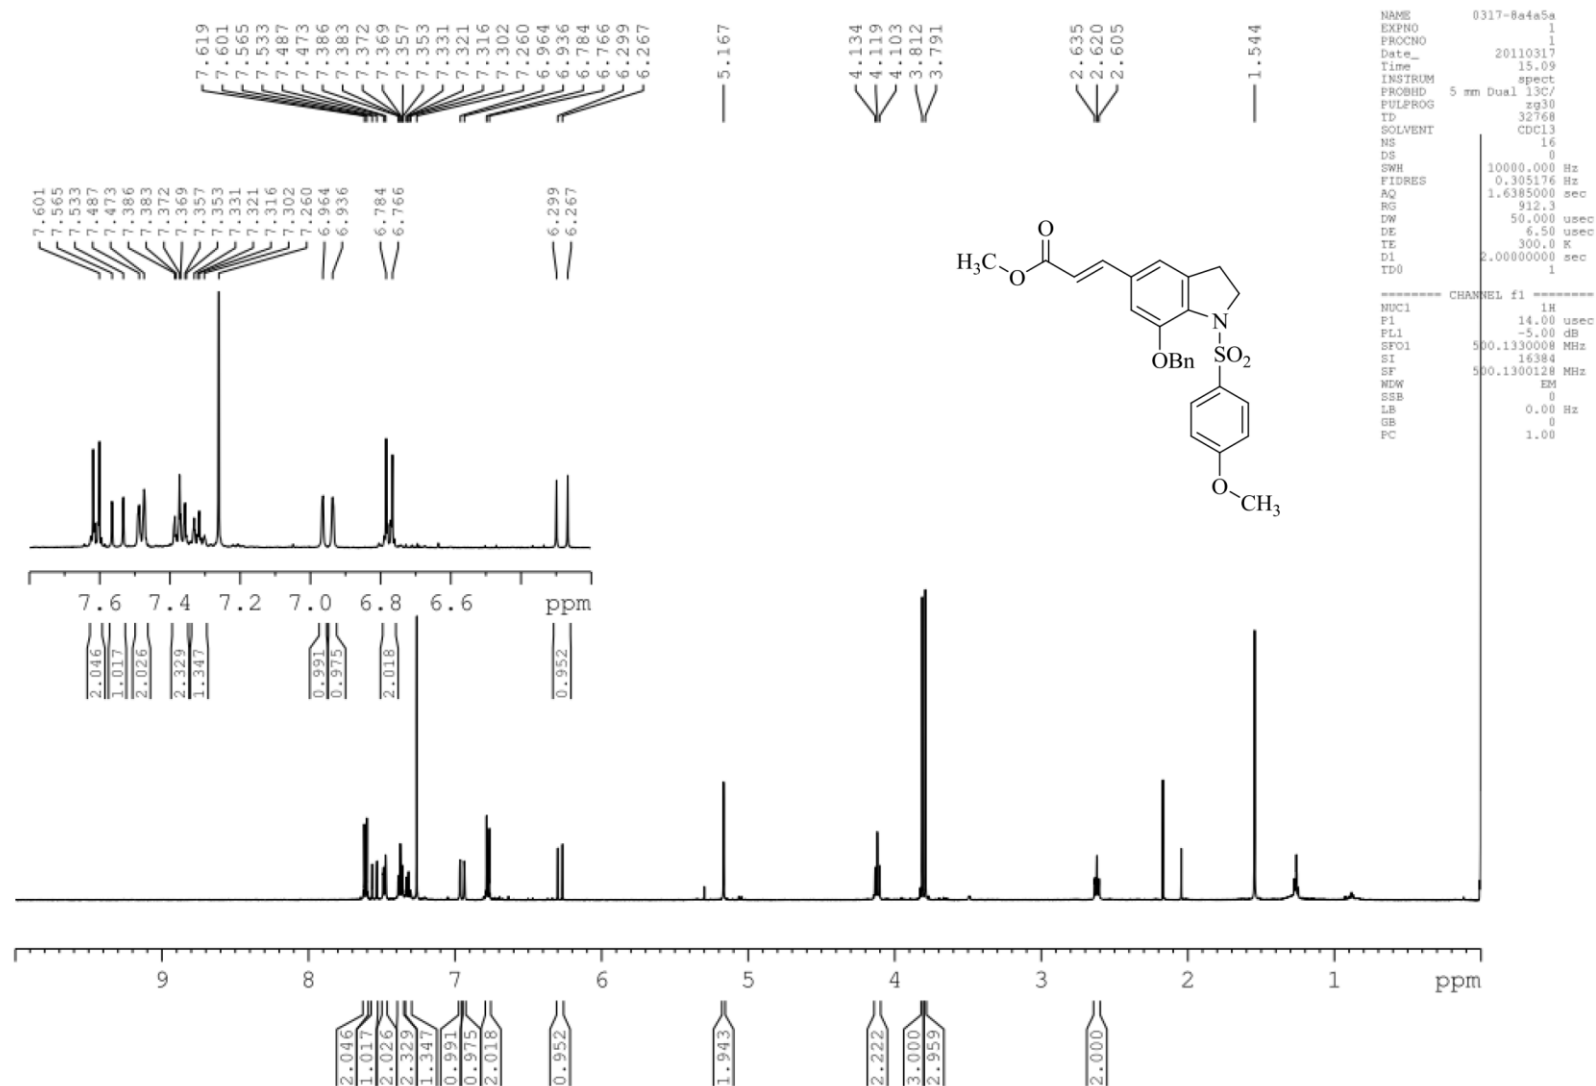

<sup>1</sup>H Spectrum for compound 24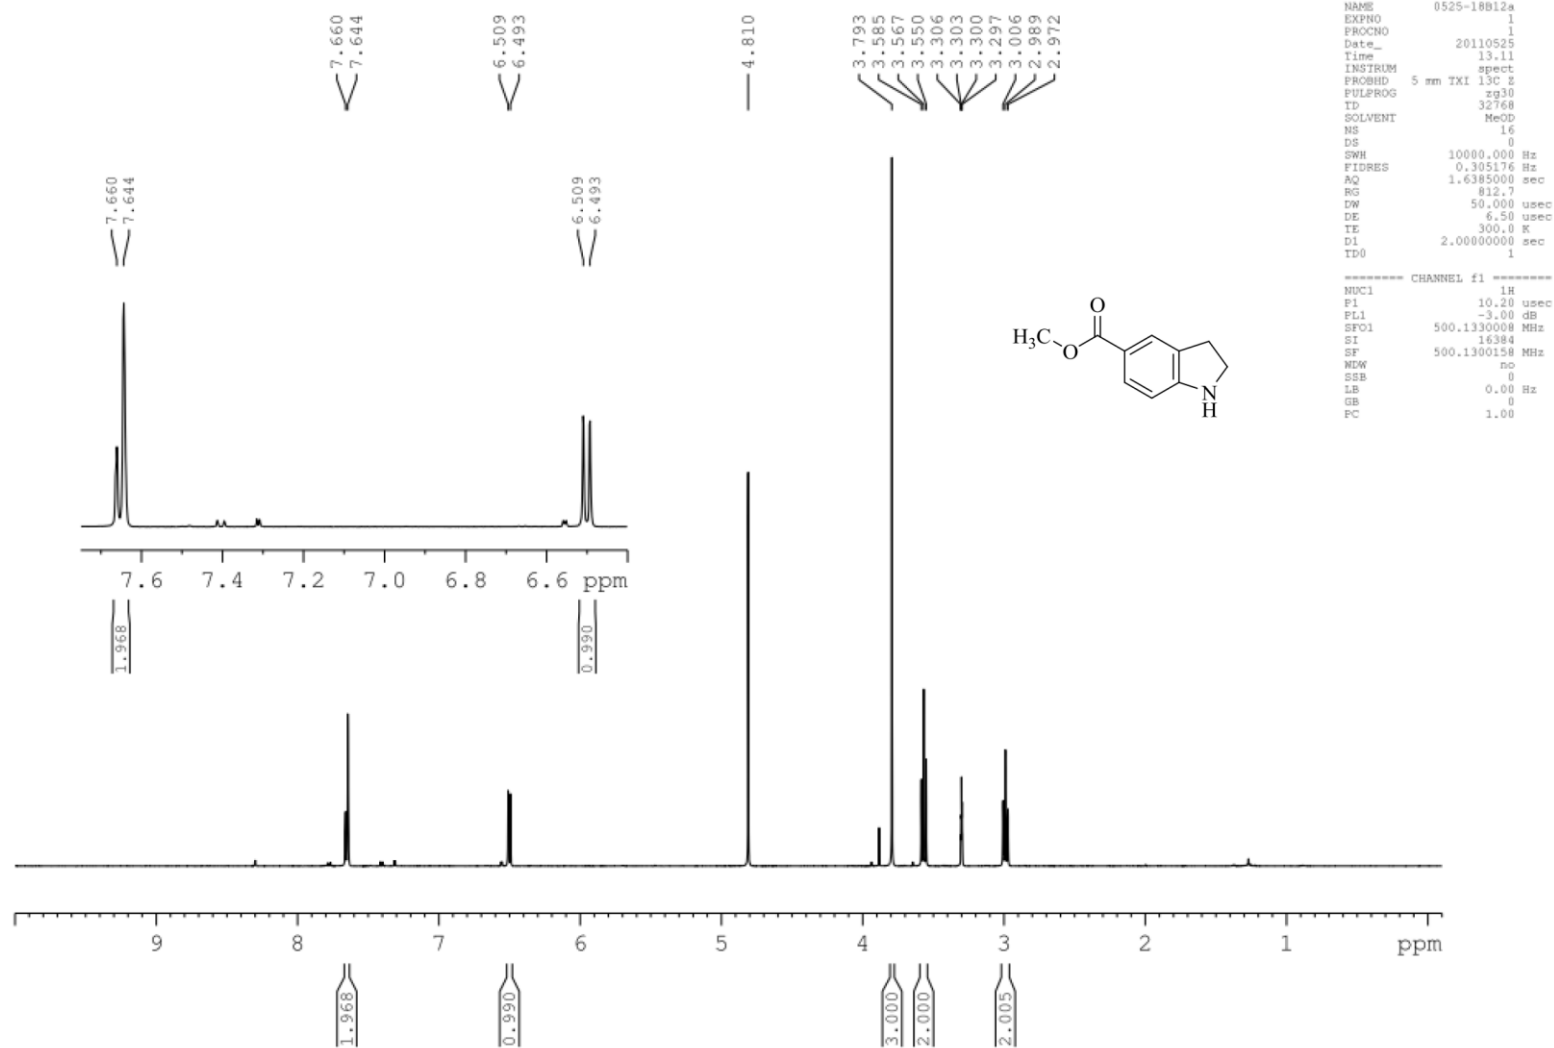

<sup>1</sup>H Spectrum for compound 25c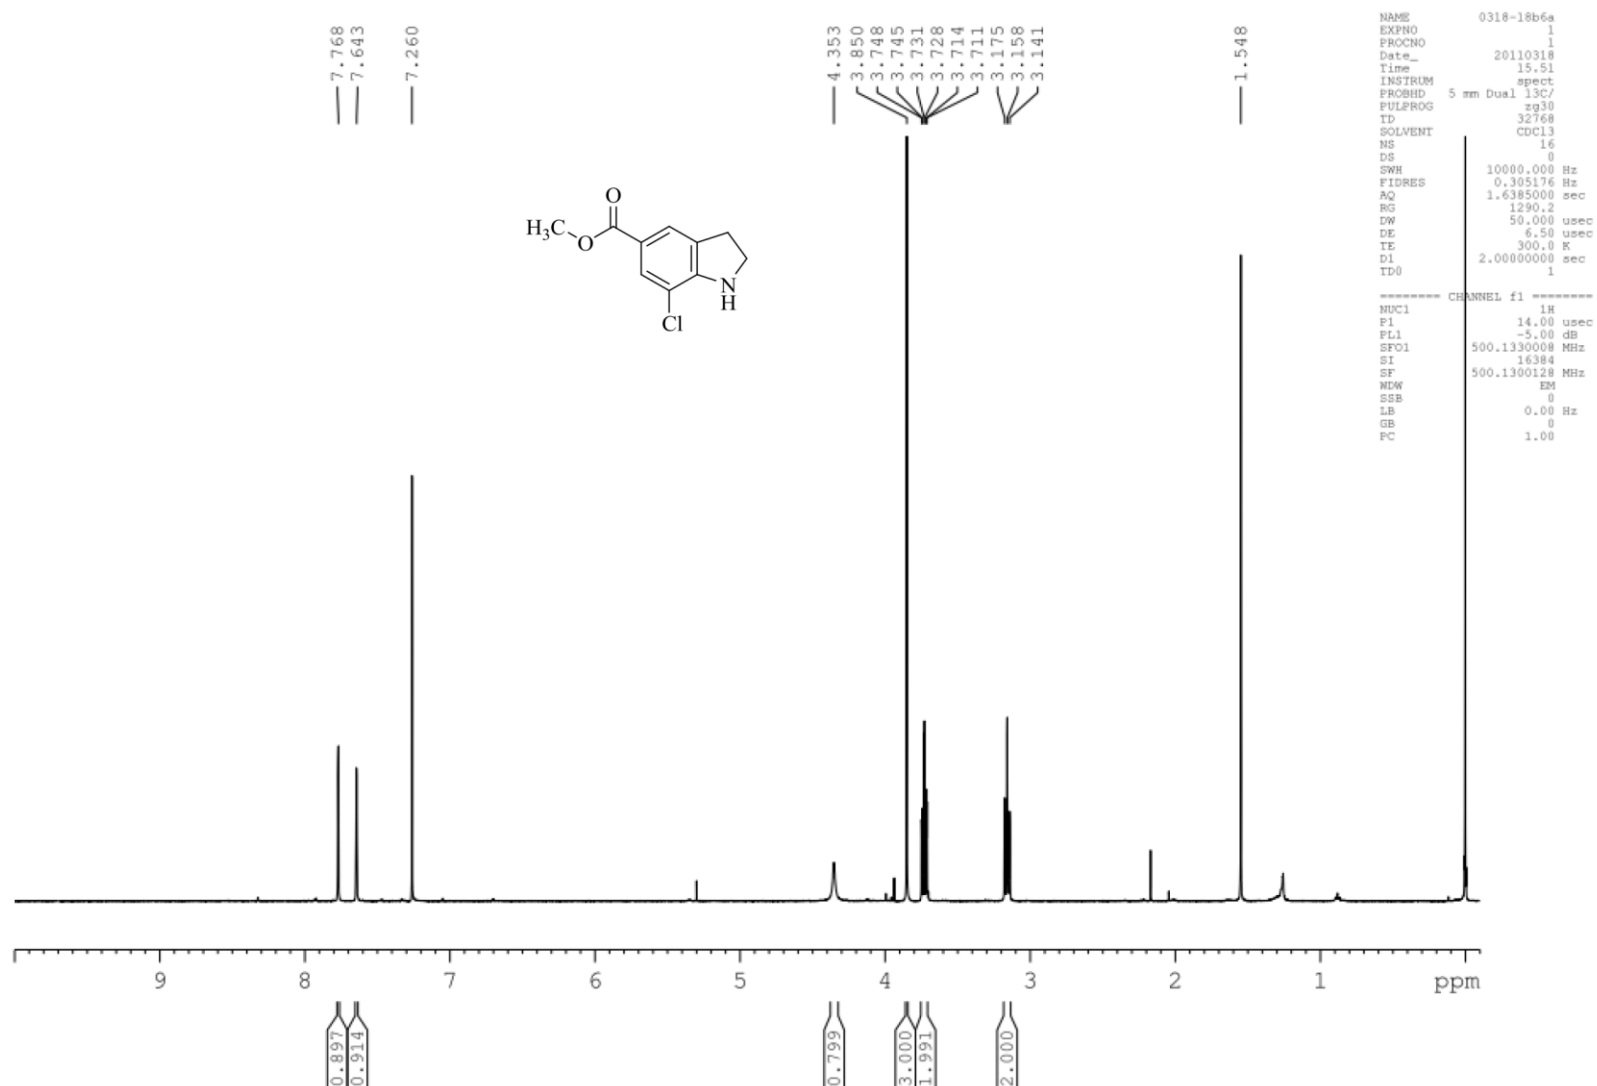

<sup>1</sup>H Spectrum for compound 25d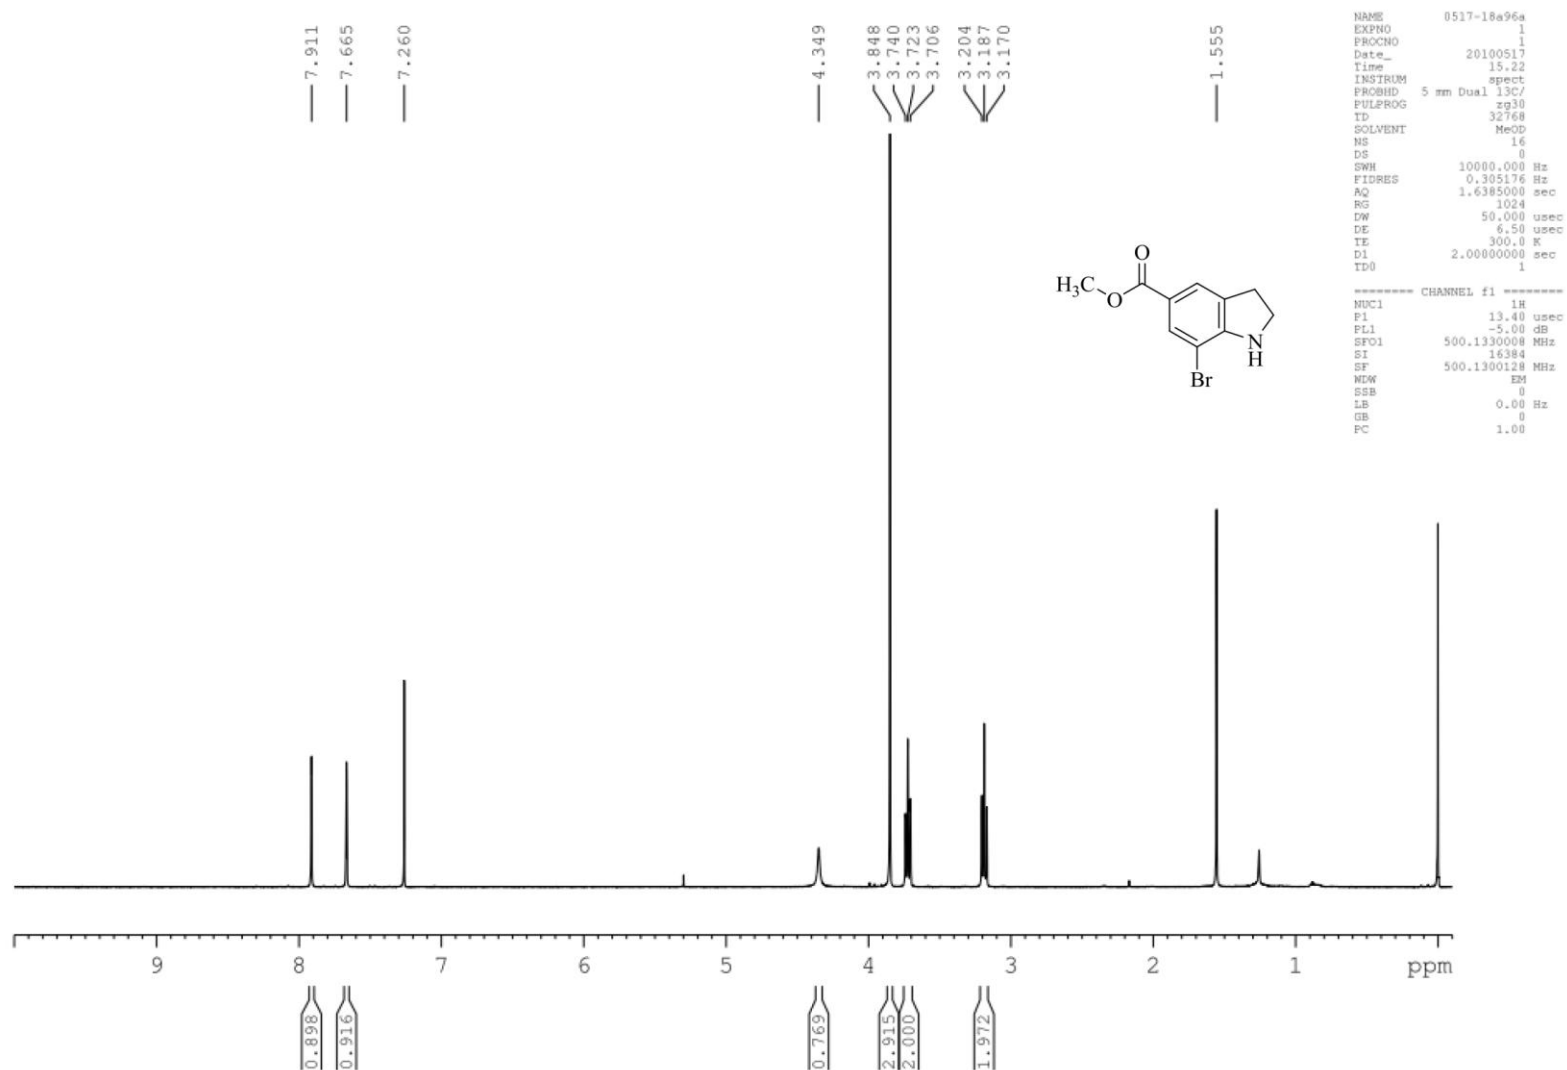

<sup>1</sup>H Spectrum for compound 25e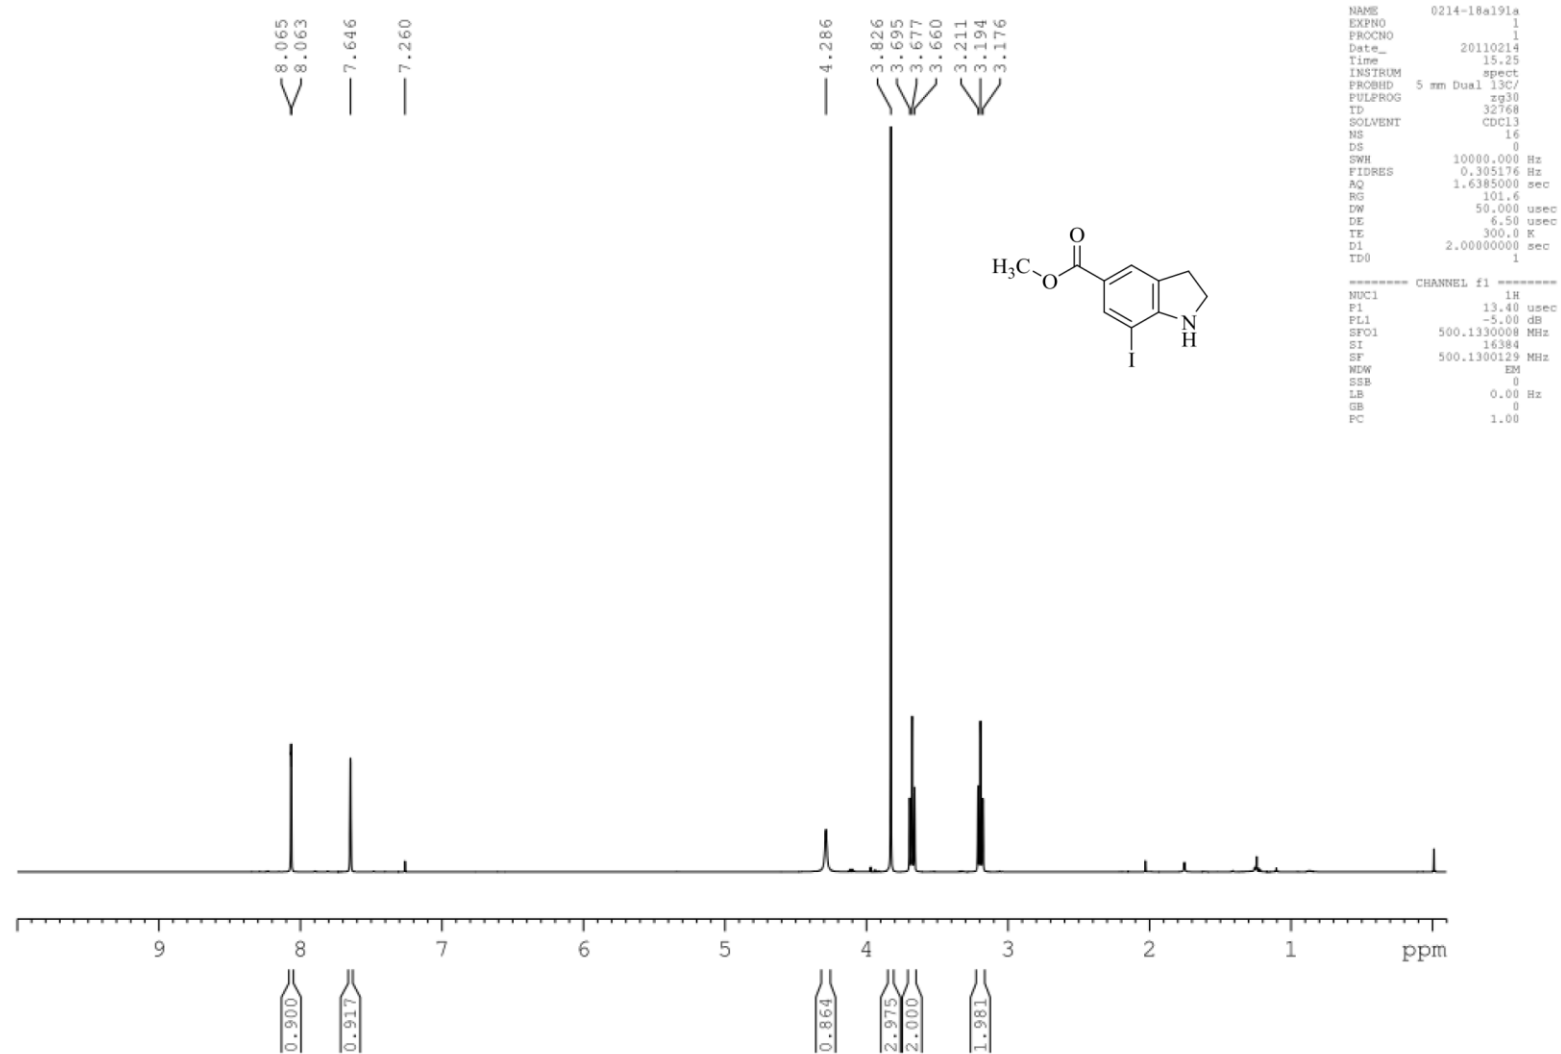

<sup>1</sup>H Spectrum for compound 26c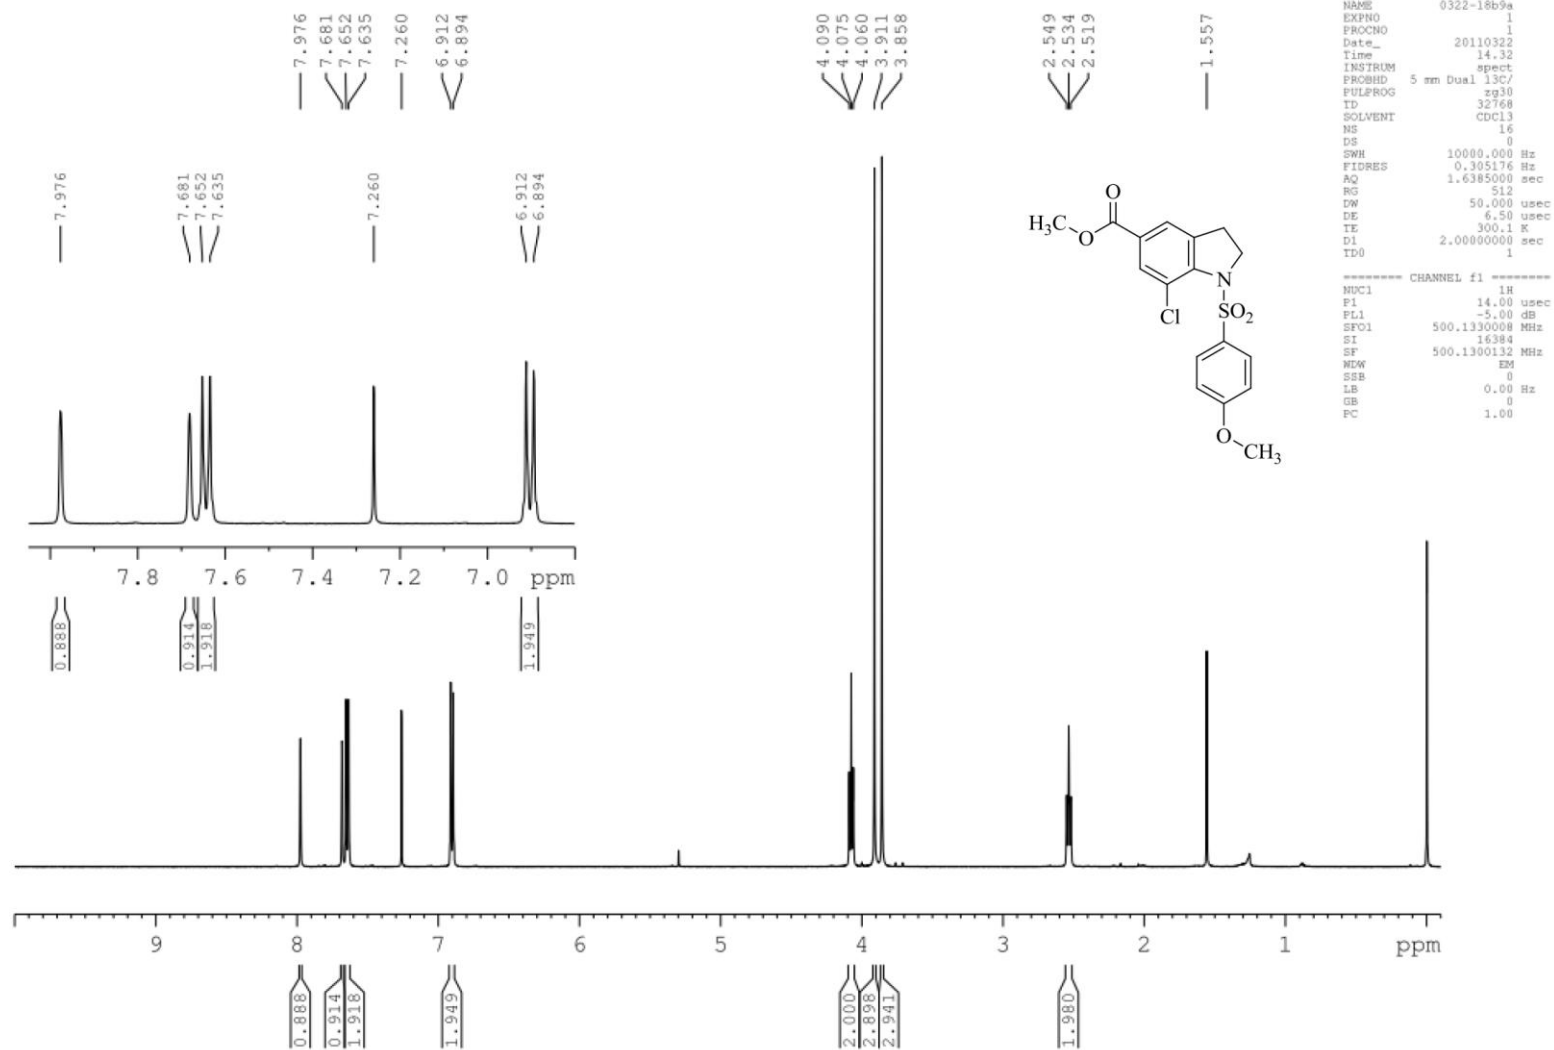

<sup>1</sup>H Spectrum for compound 26d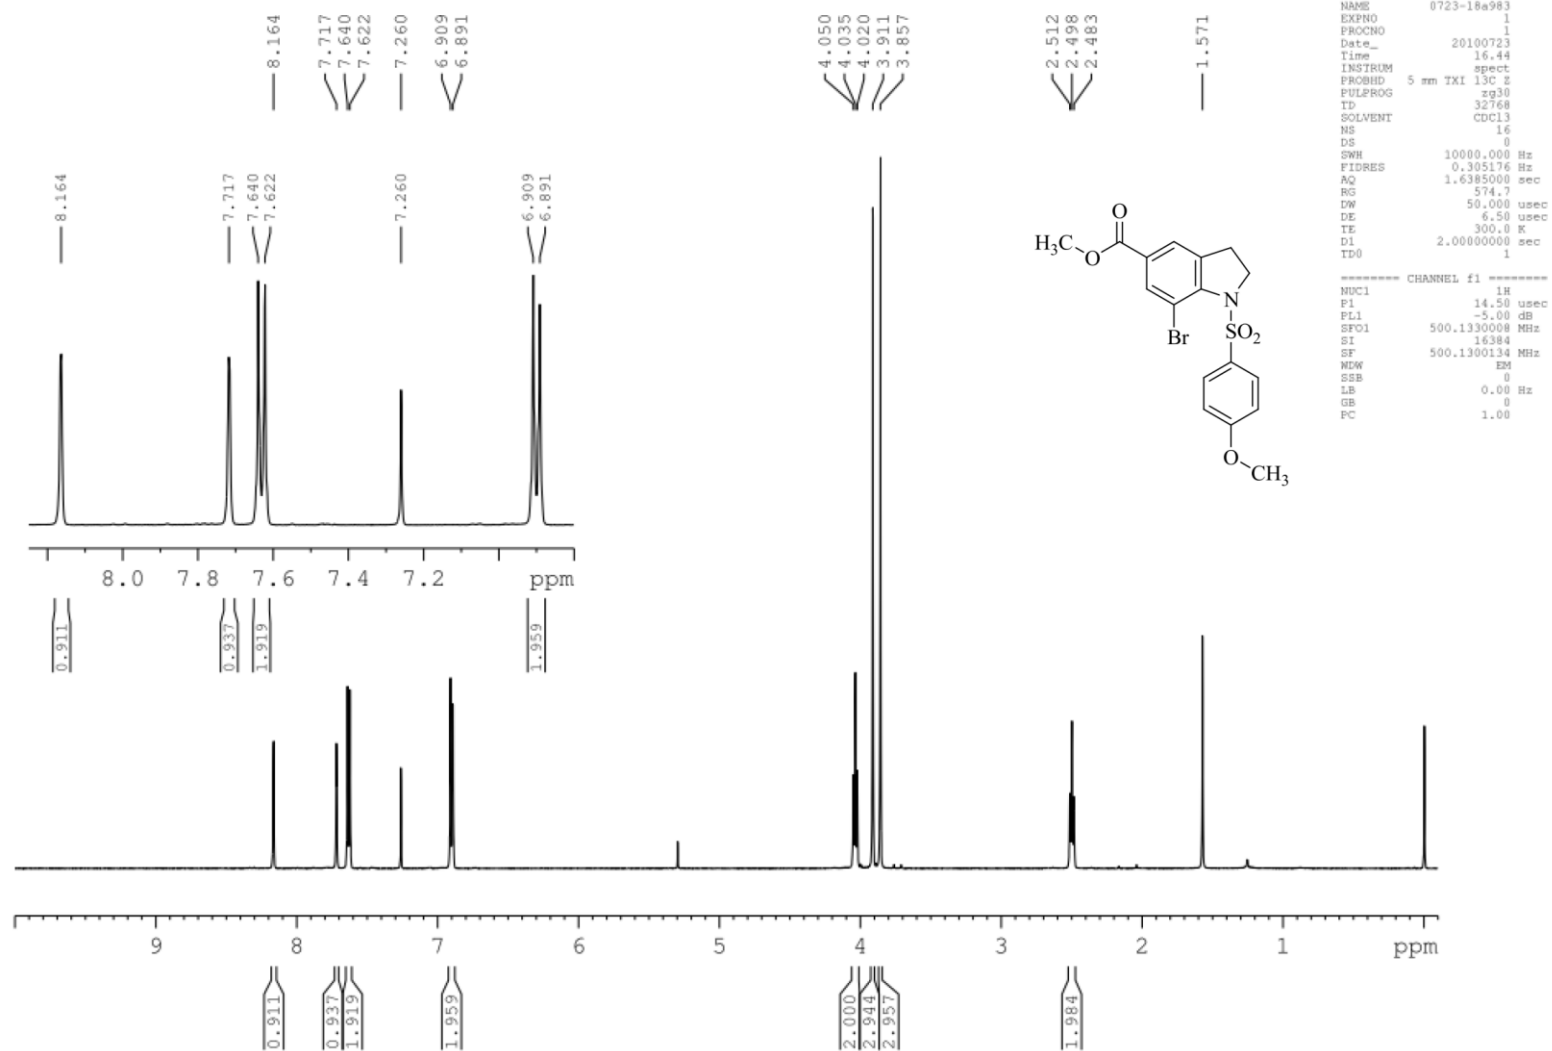

<sup>1</sup>H Spectrum for compound 26e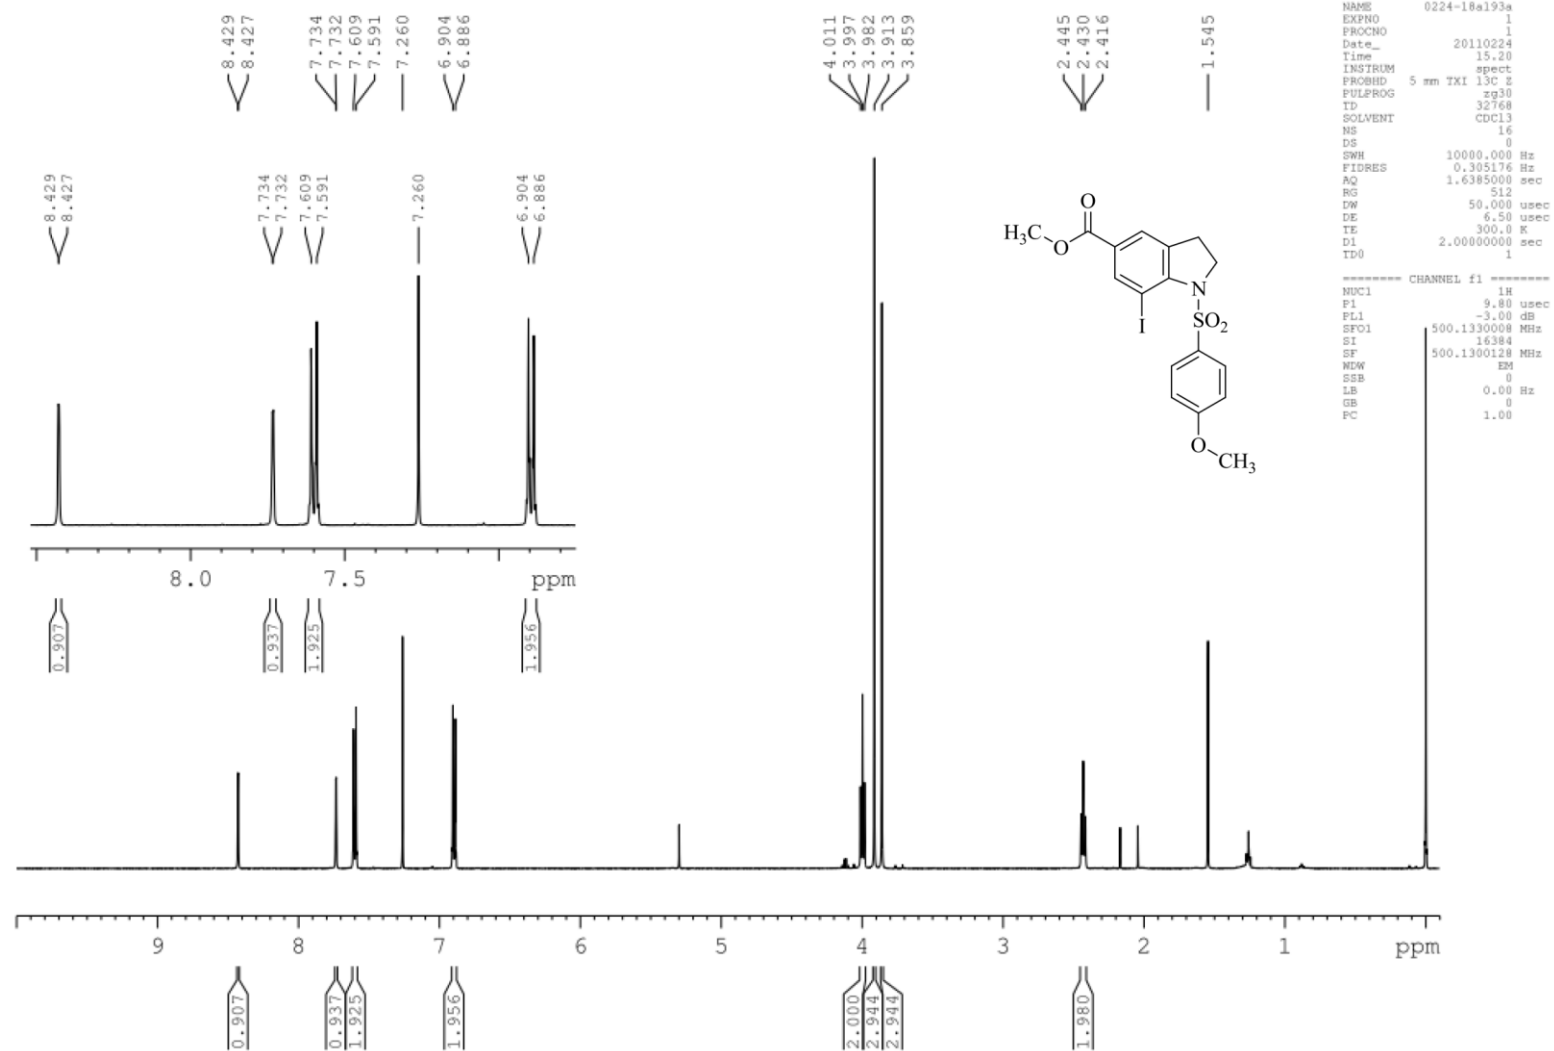

<sup>1</sup>H Spectrum for compound 27c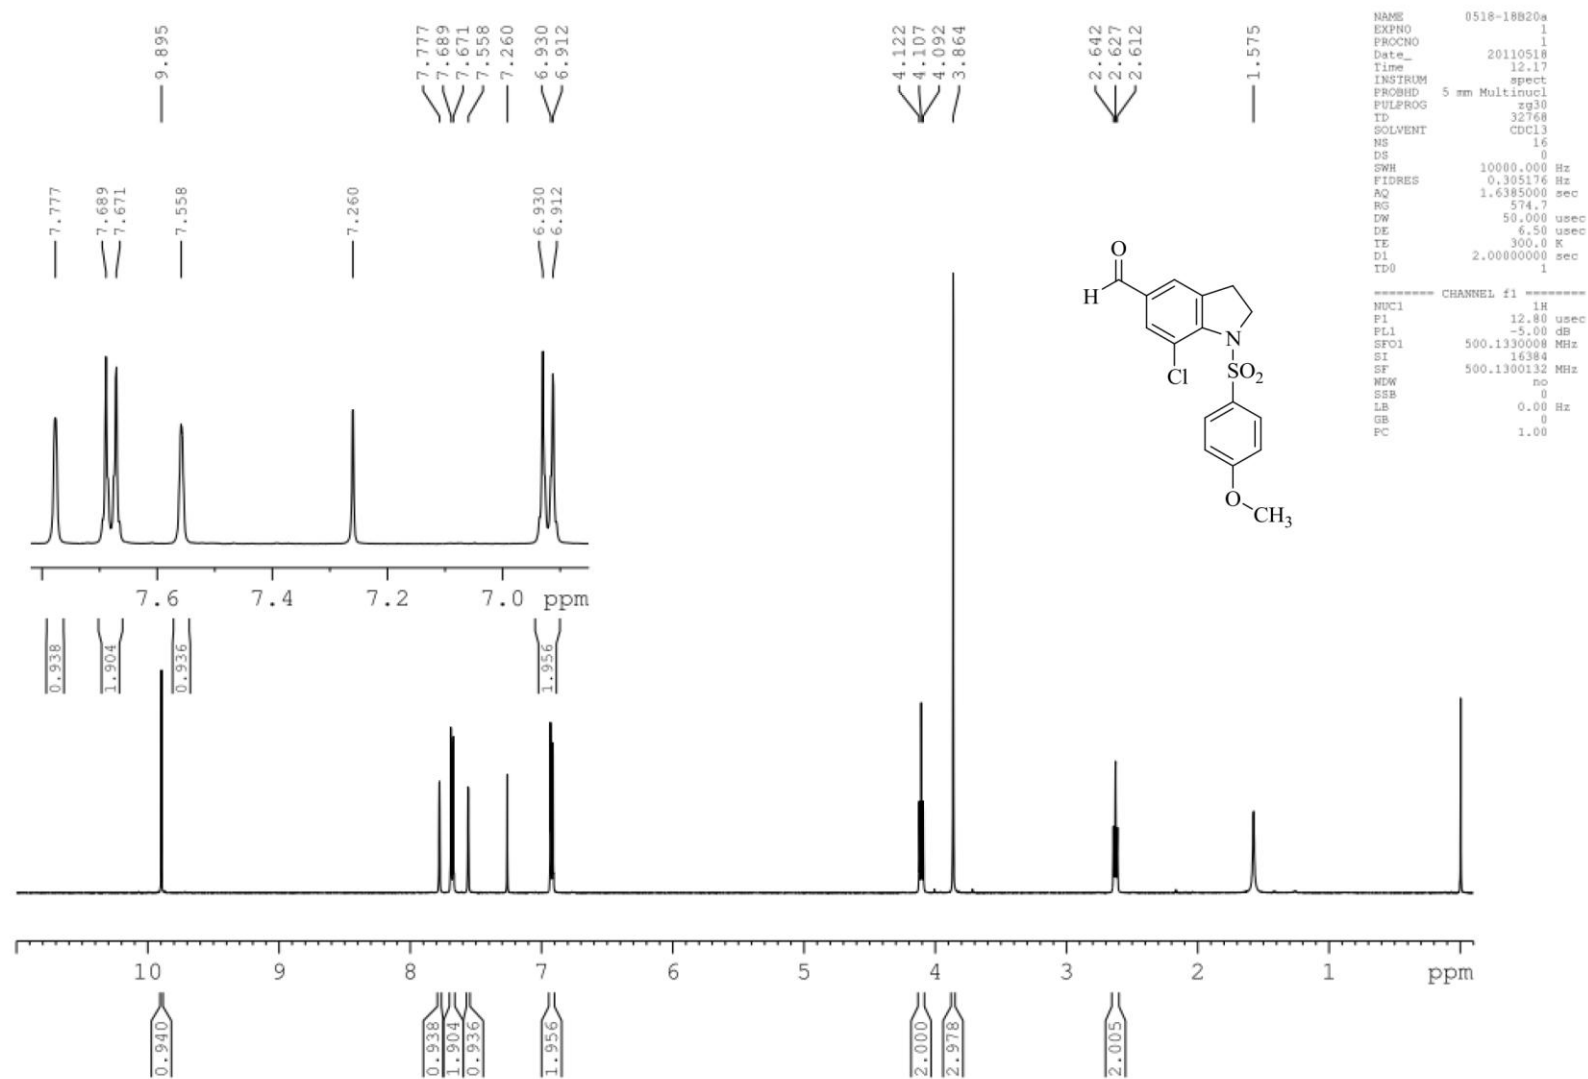

<sup>1</sup>H Spectrum for compound 27d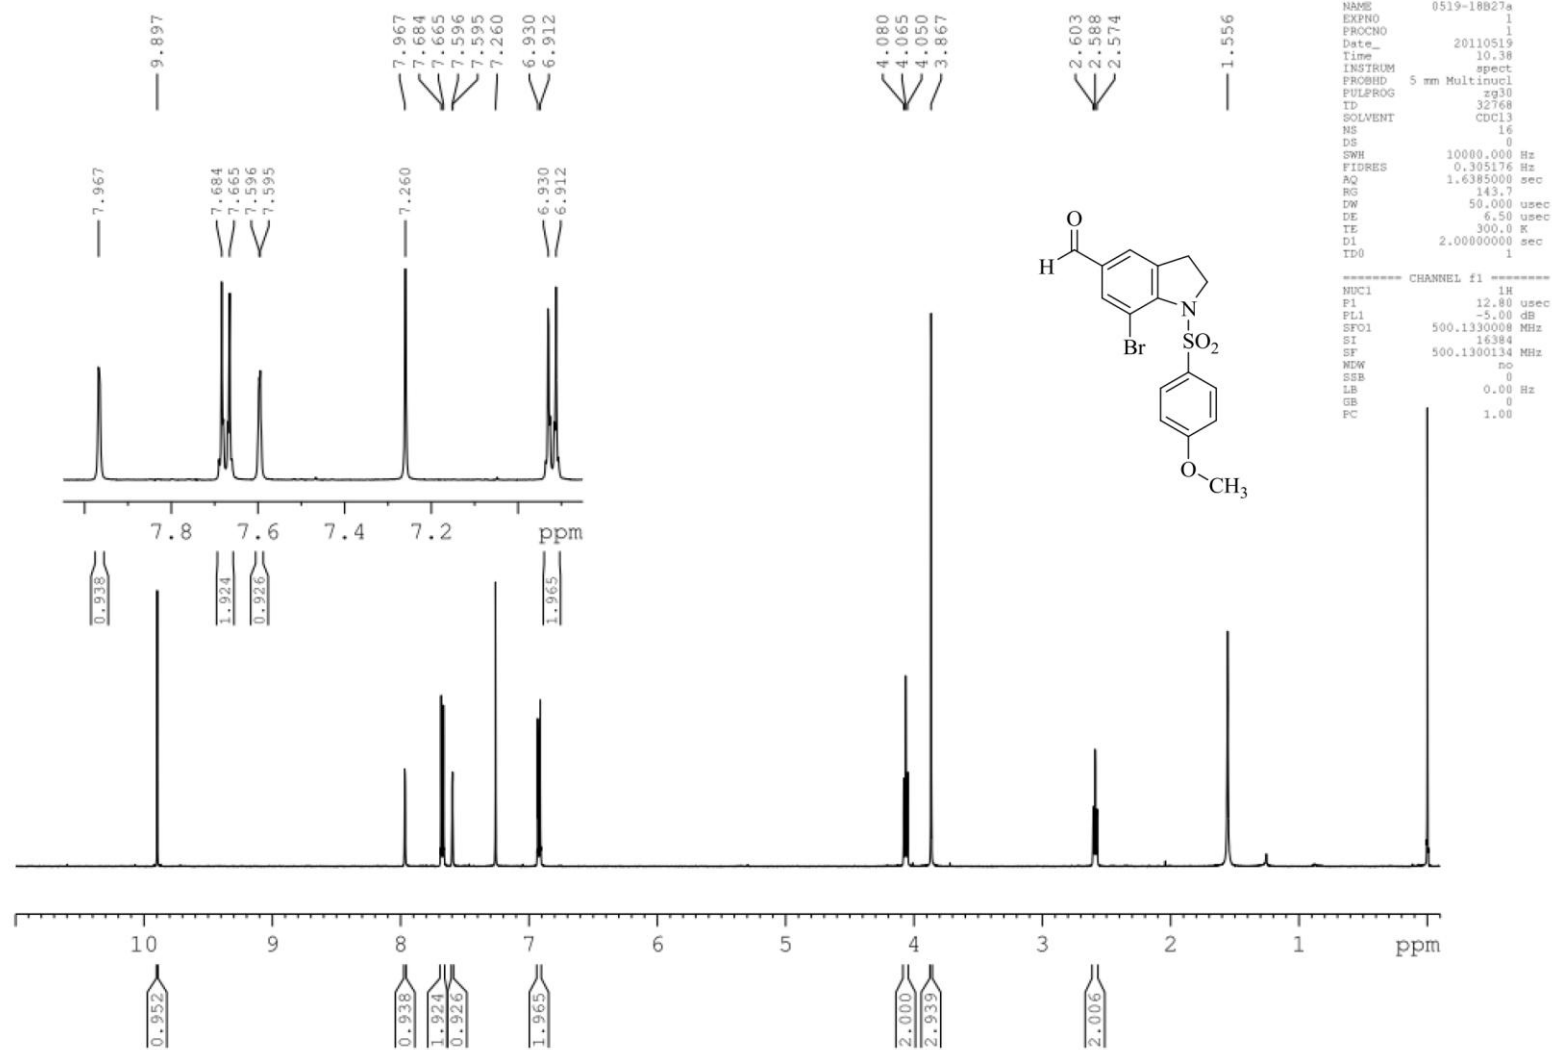

<sup>1</sup>H Spectrum for compound 27e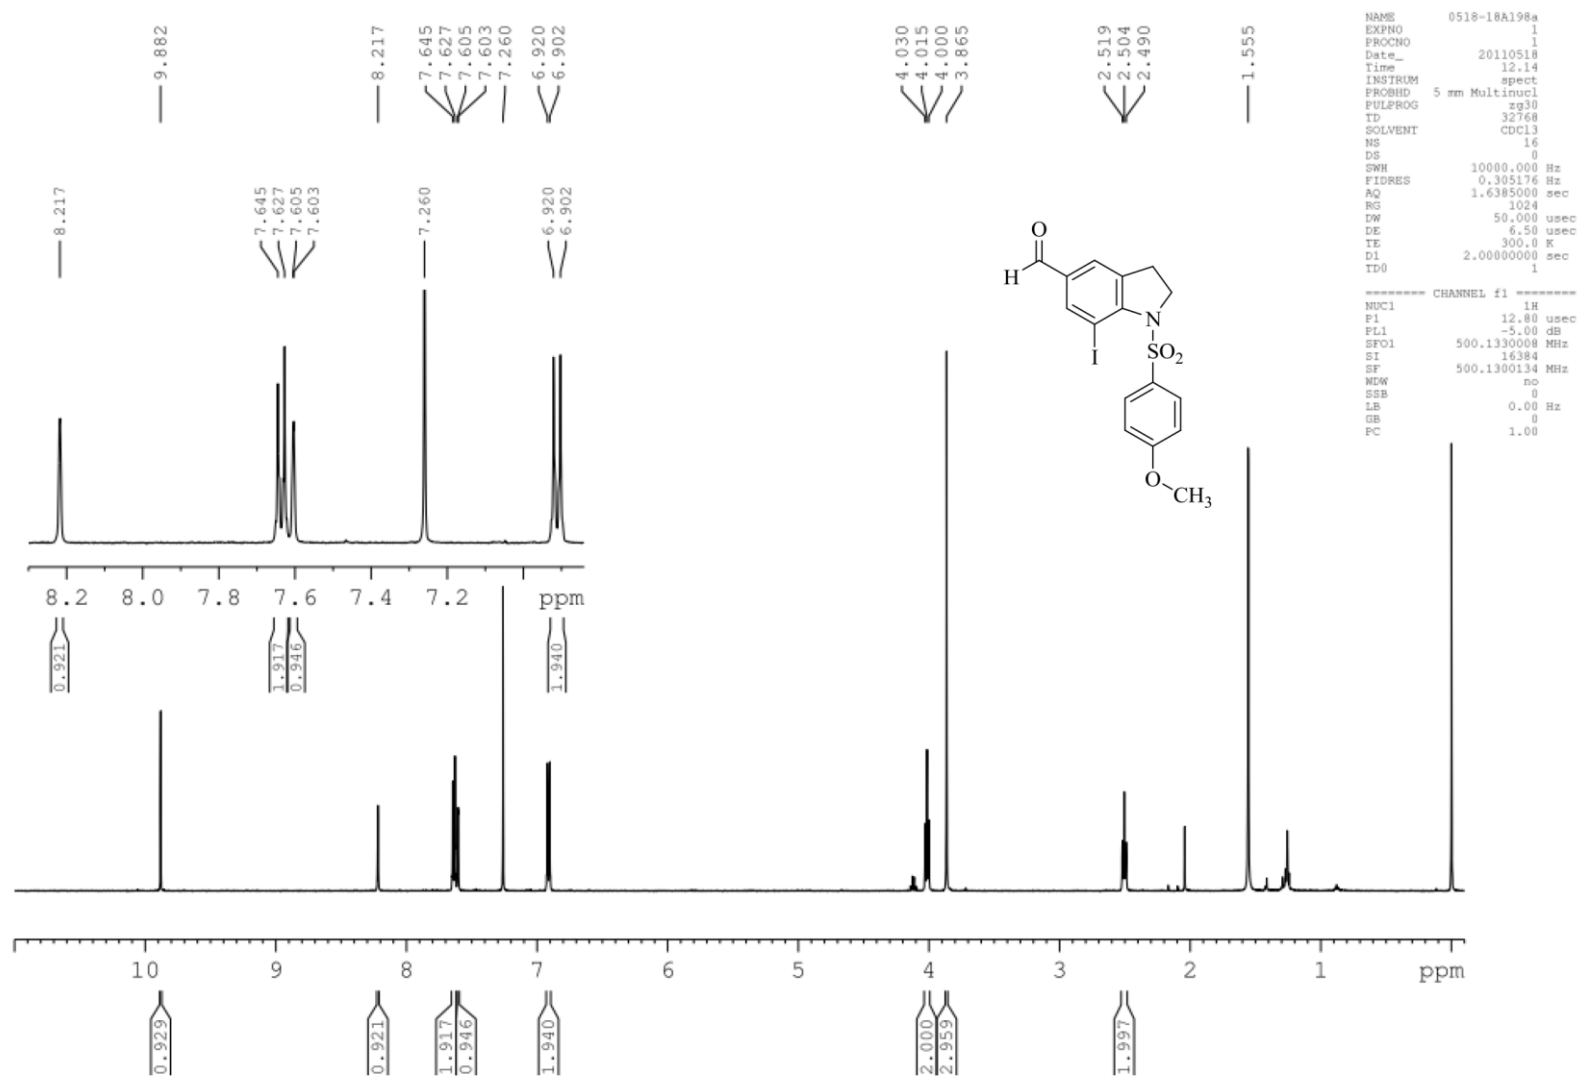

<sup>1</sup>H Spectrum for compound 28f

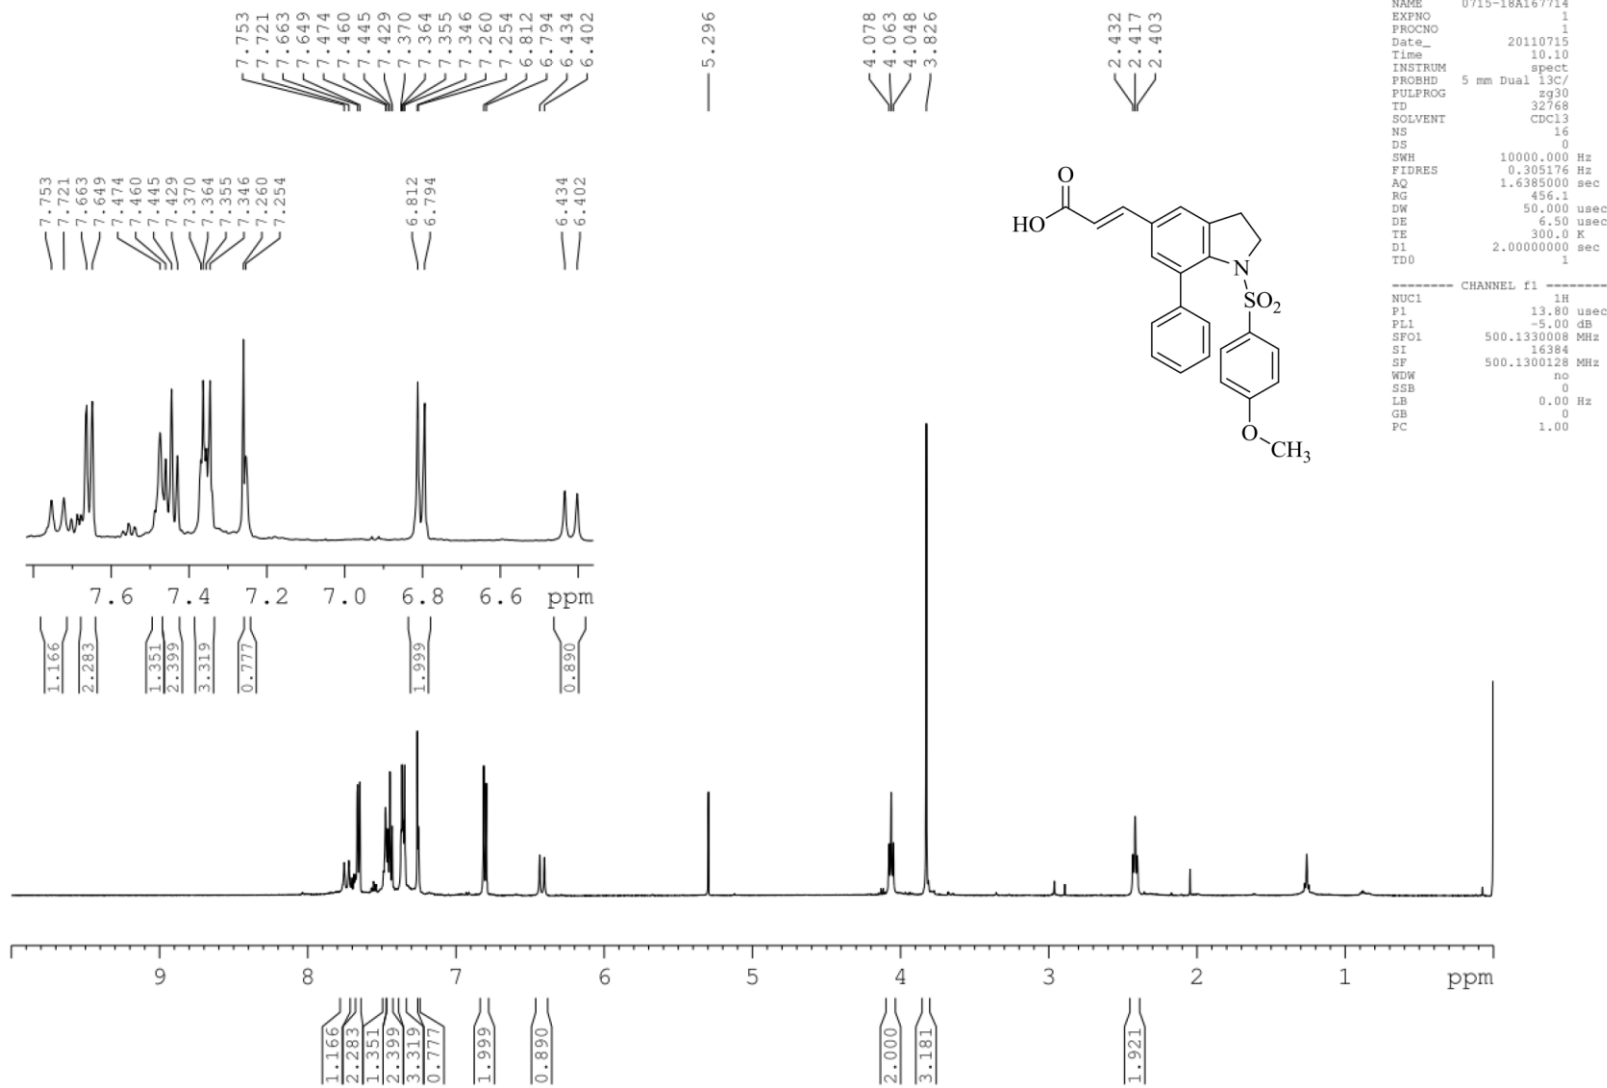

<sup>1</sup>H Spectrum for compound 28g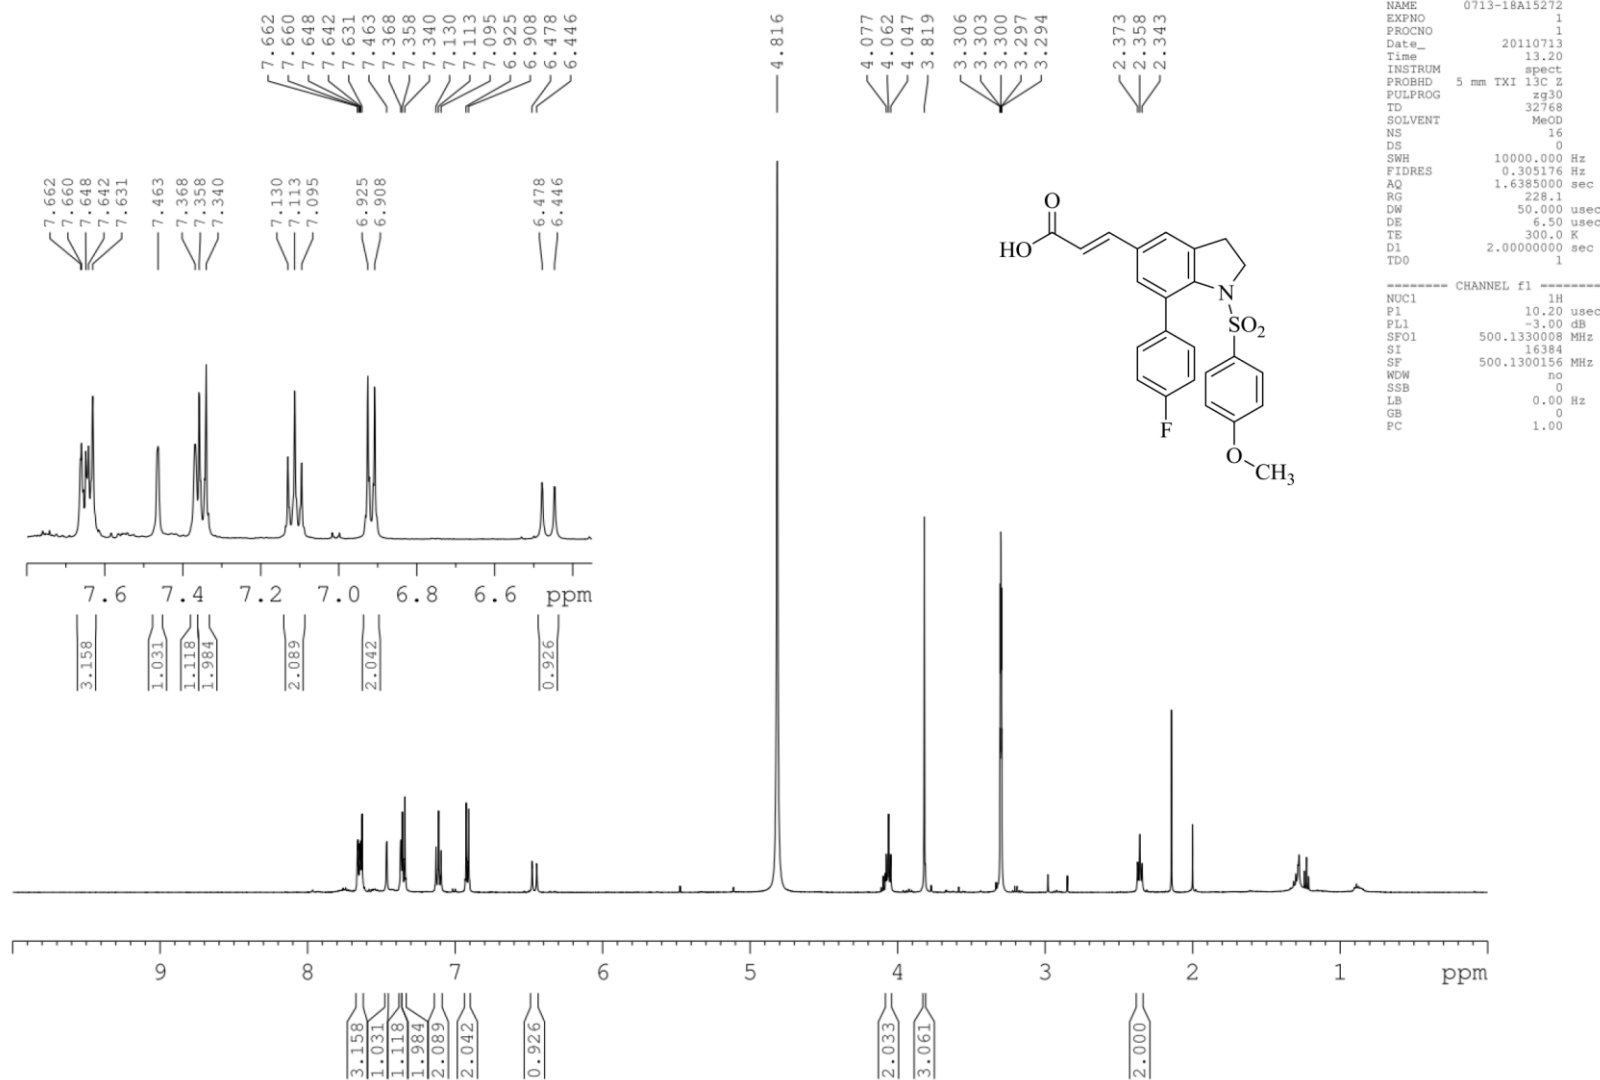

<sup>1</sup>H Spectrum for compound 28h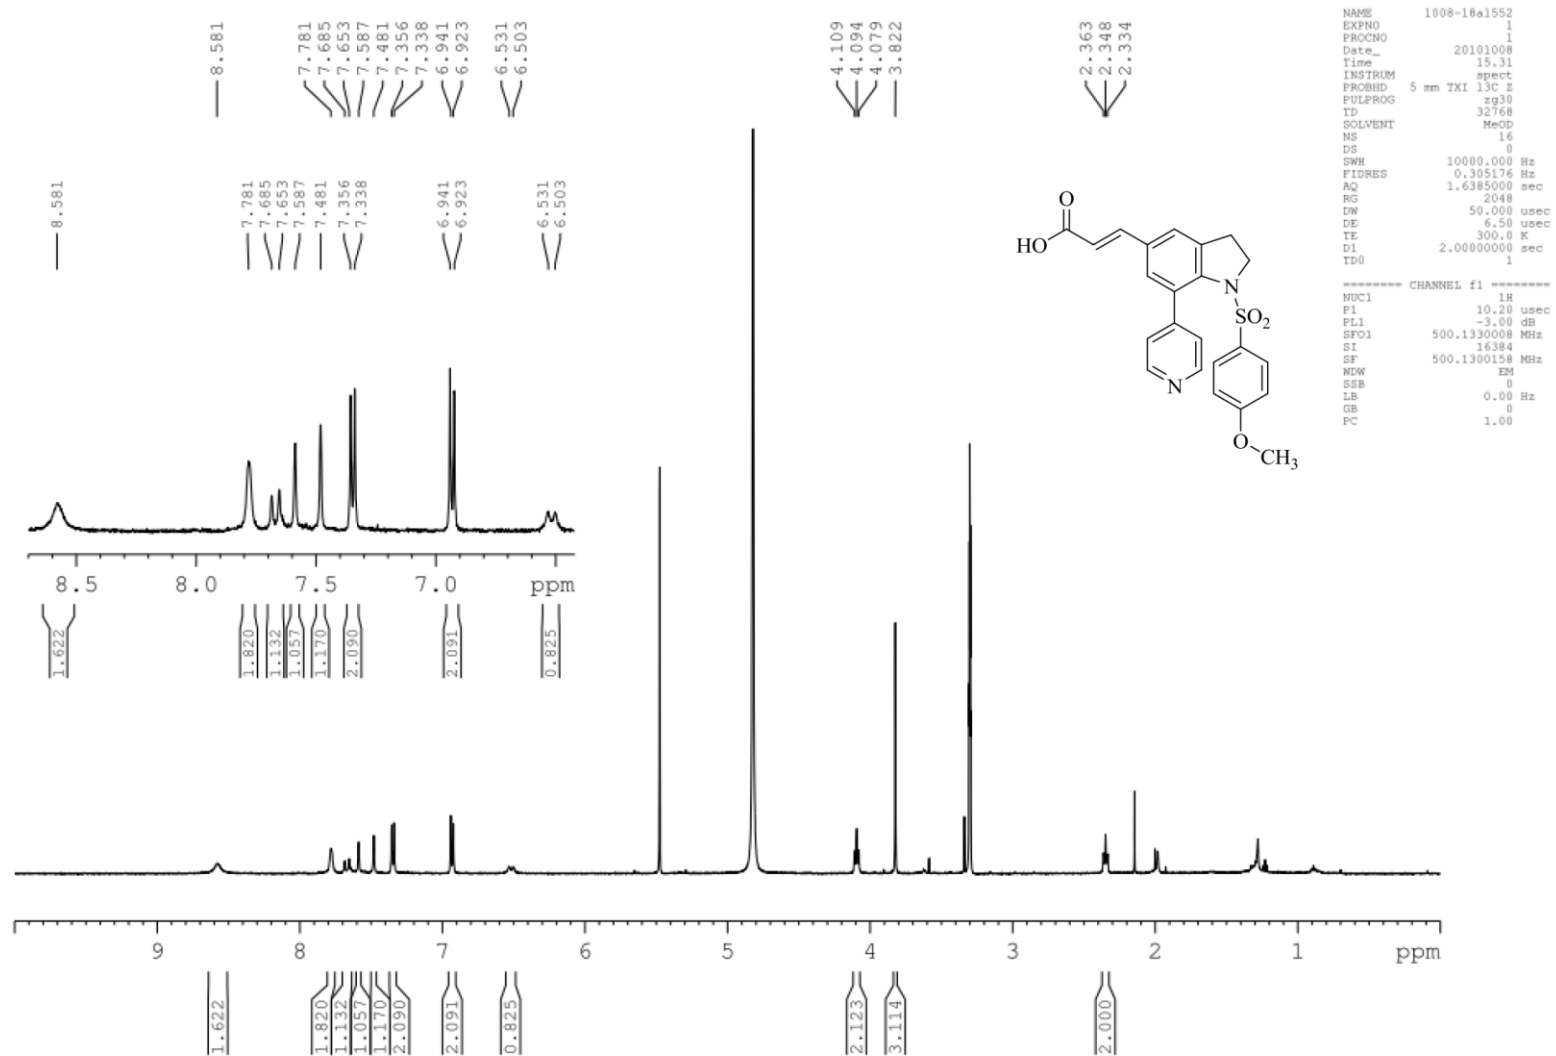

<sup>1</sup>H Spectrum for compound 30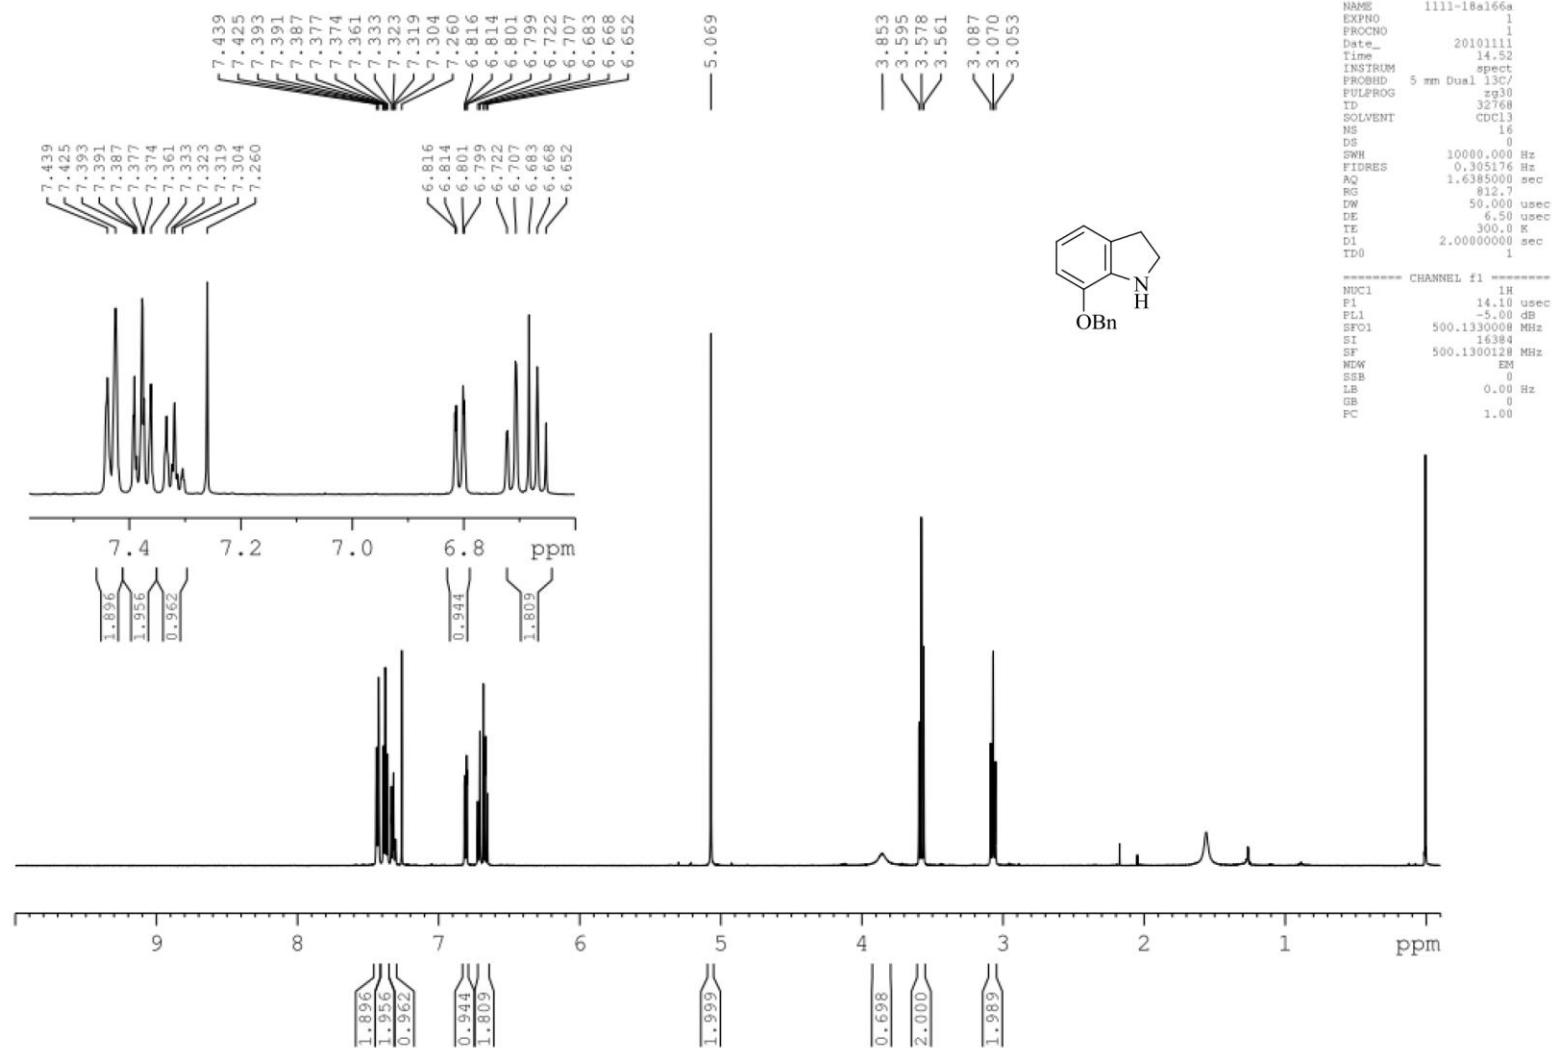

<sup>1</sup>H Spectrum for compound 31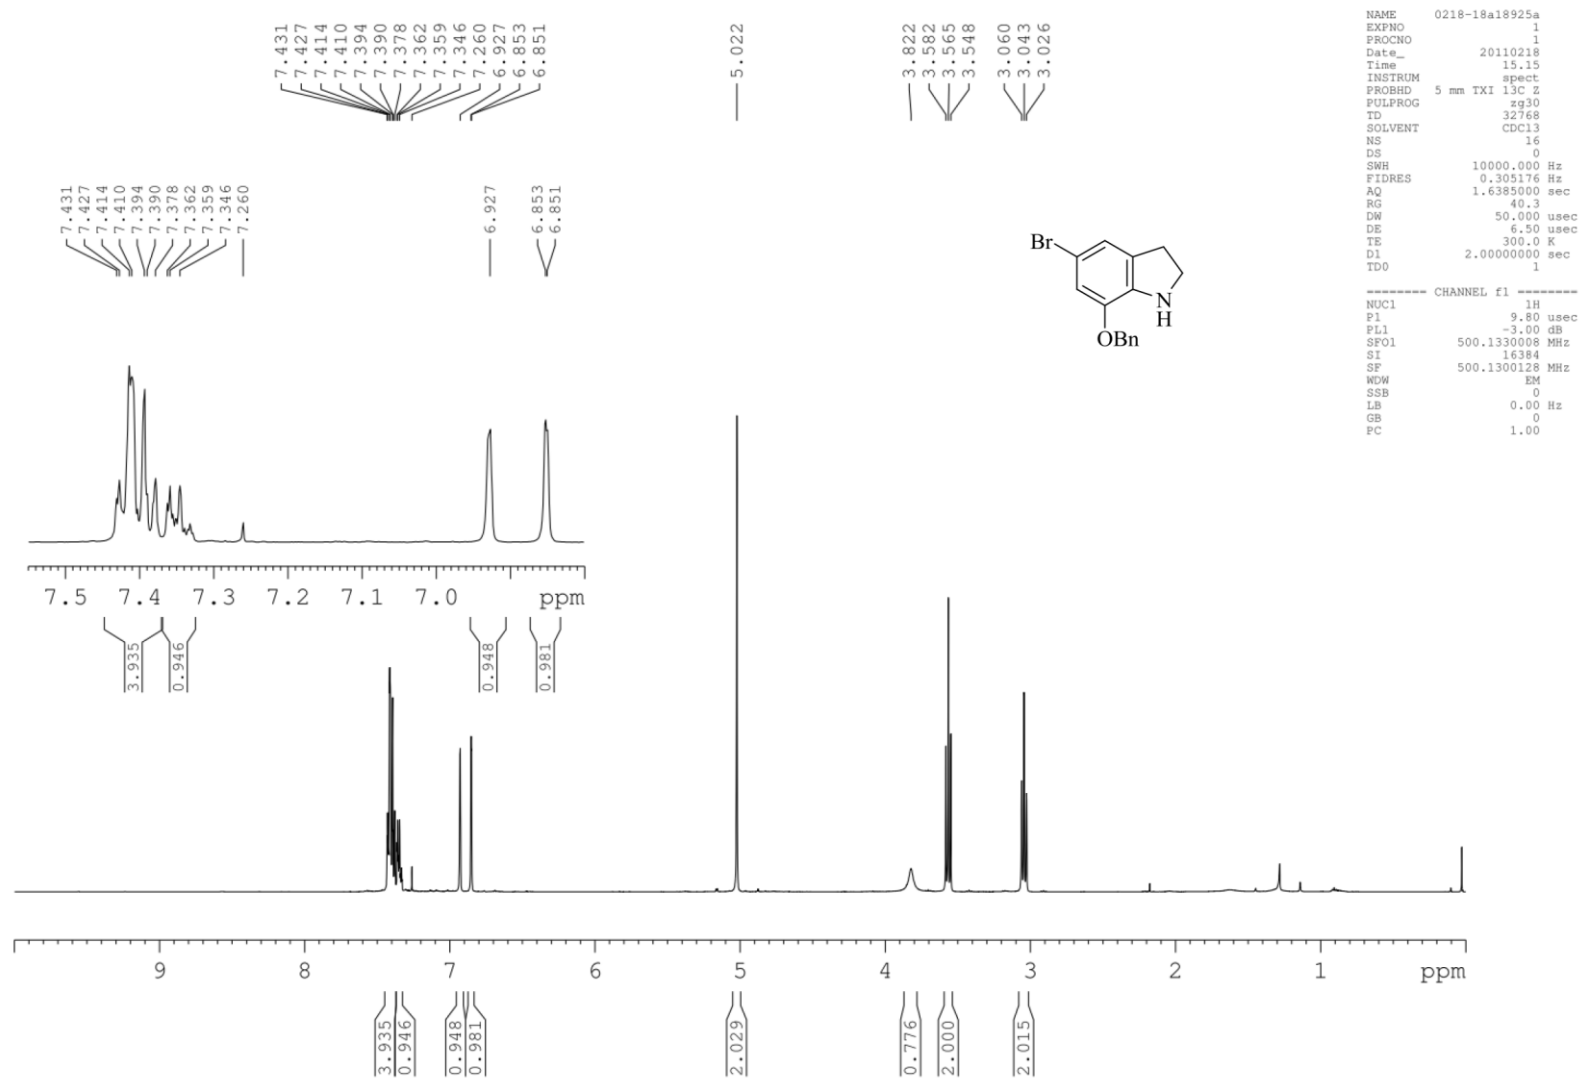

<sup>1</sup>H Spectrum for compound 32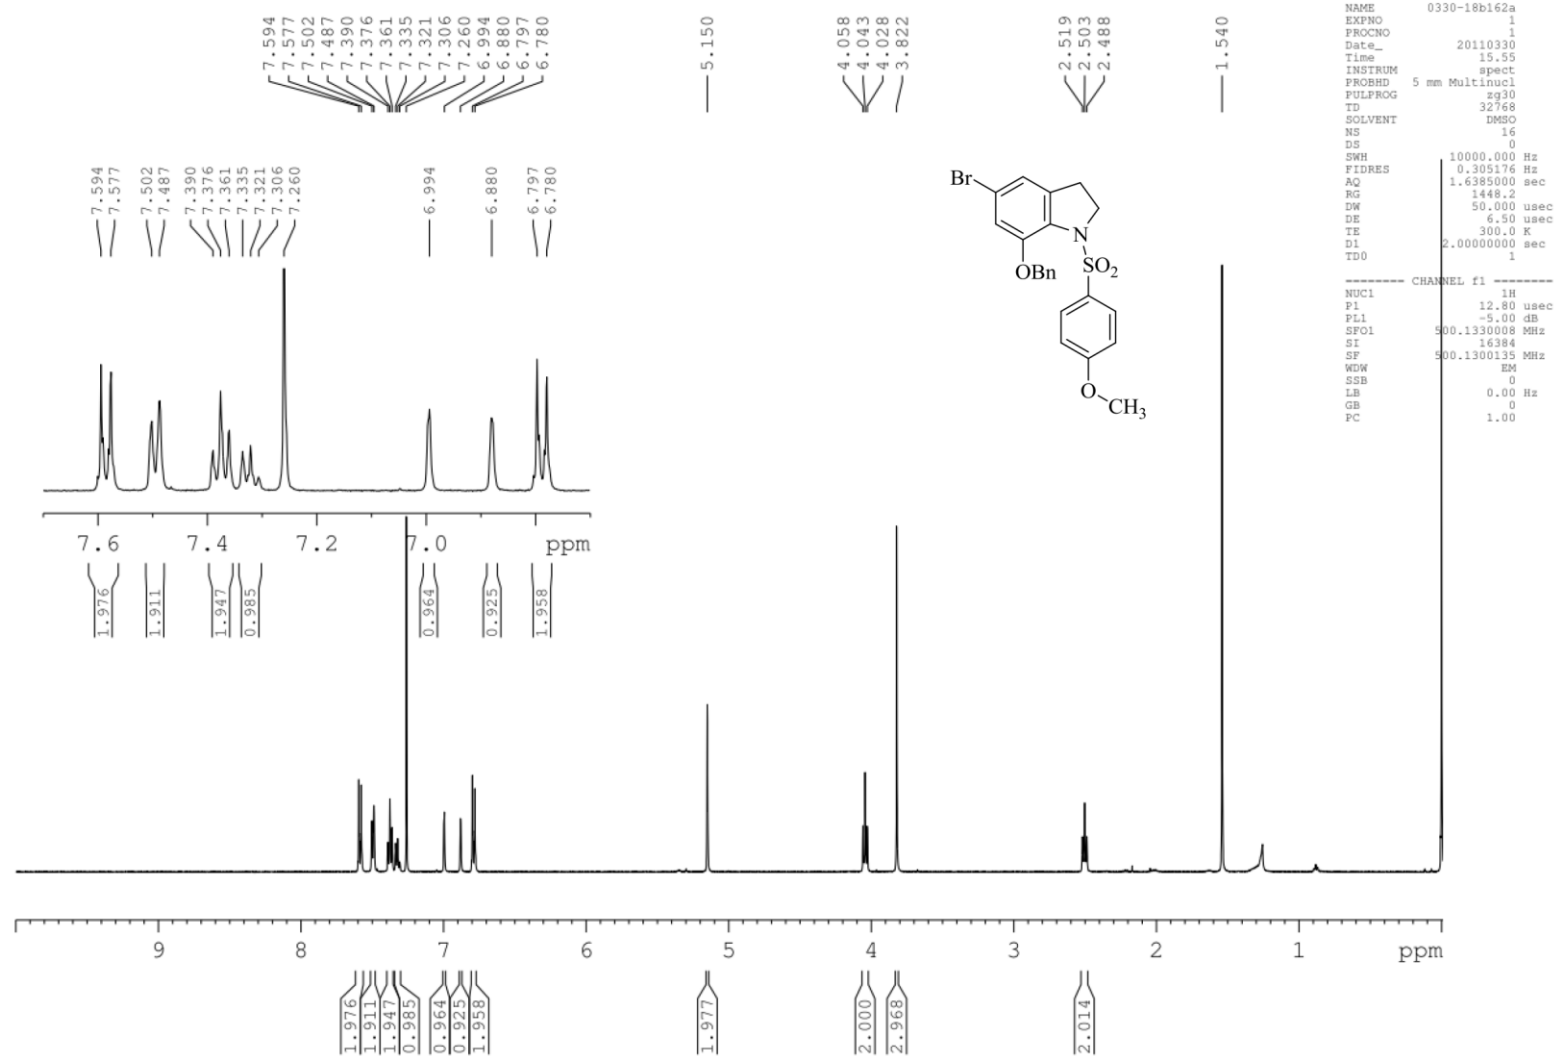

$^{13}\text{C}$  Spectrum for compound 9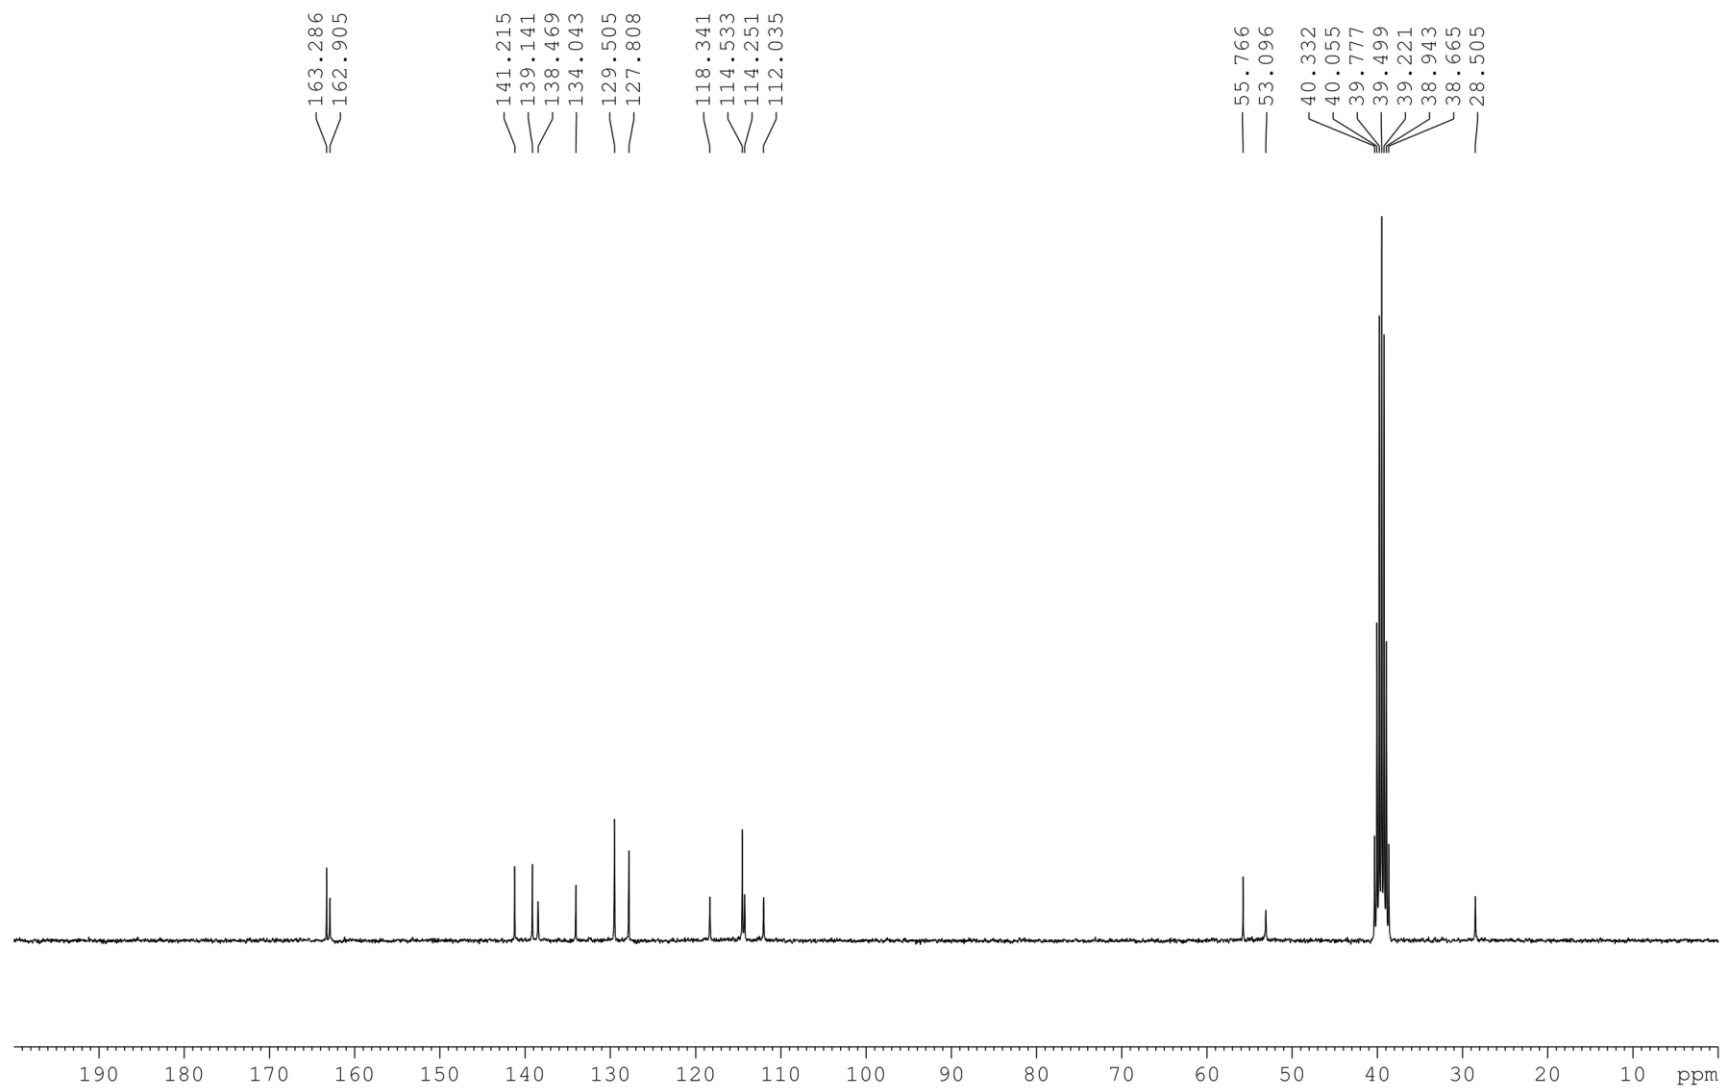

$^{13}\text{C}$  Spectrum for compound 10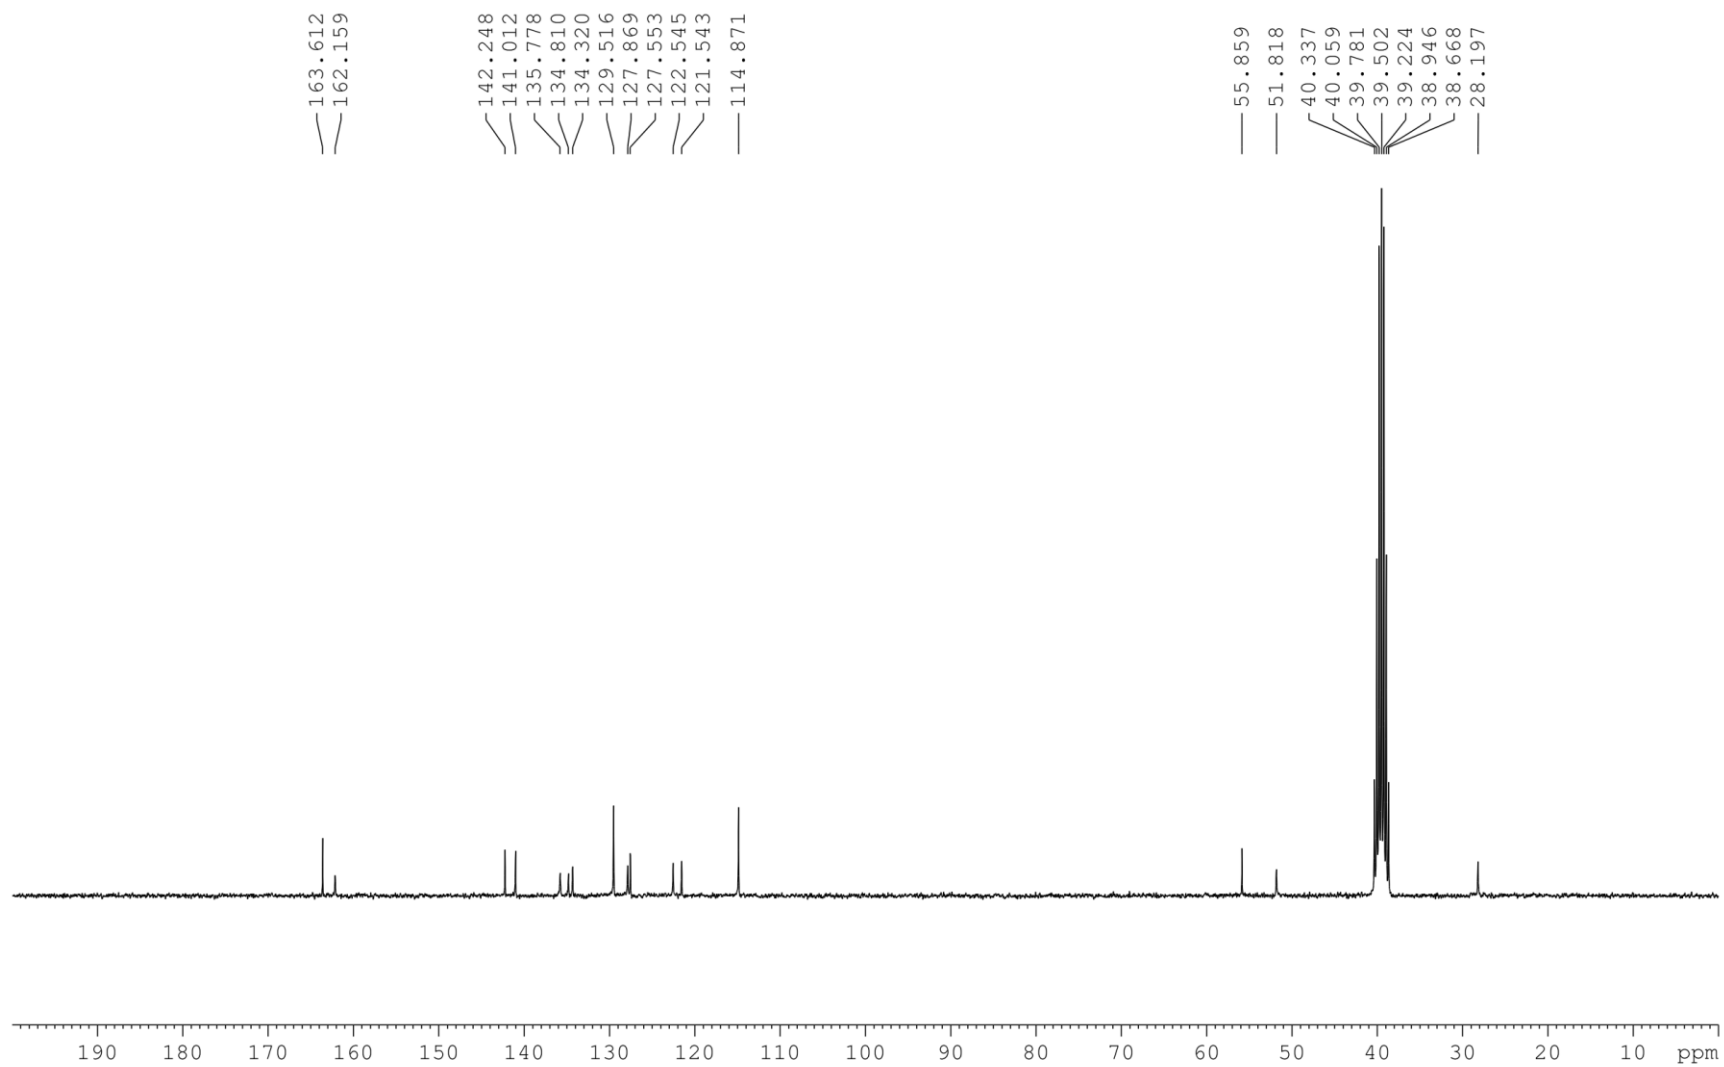

$^{13}\text{C}$  Spectrum for compound **11**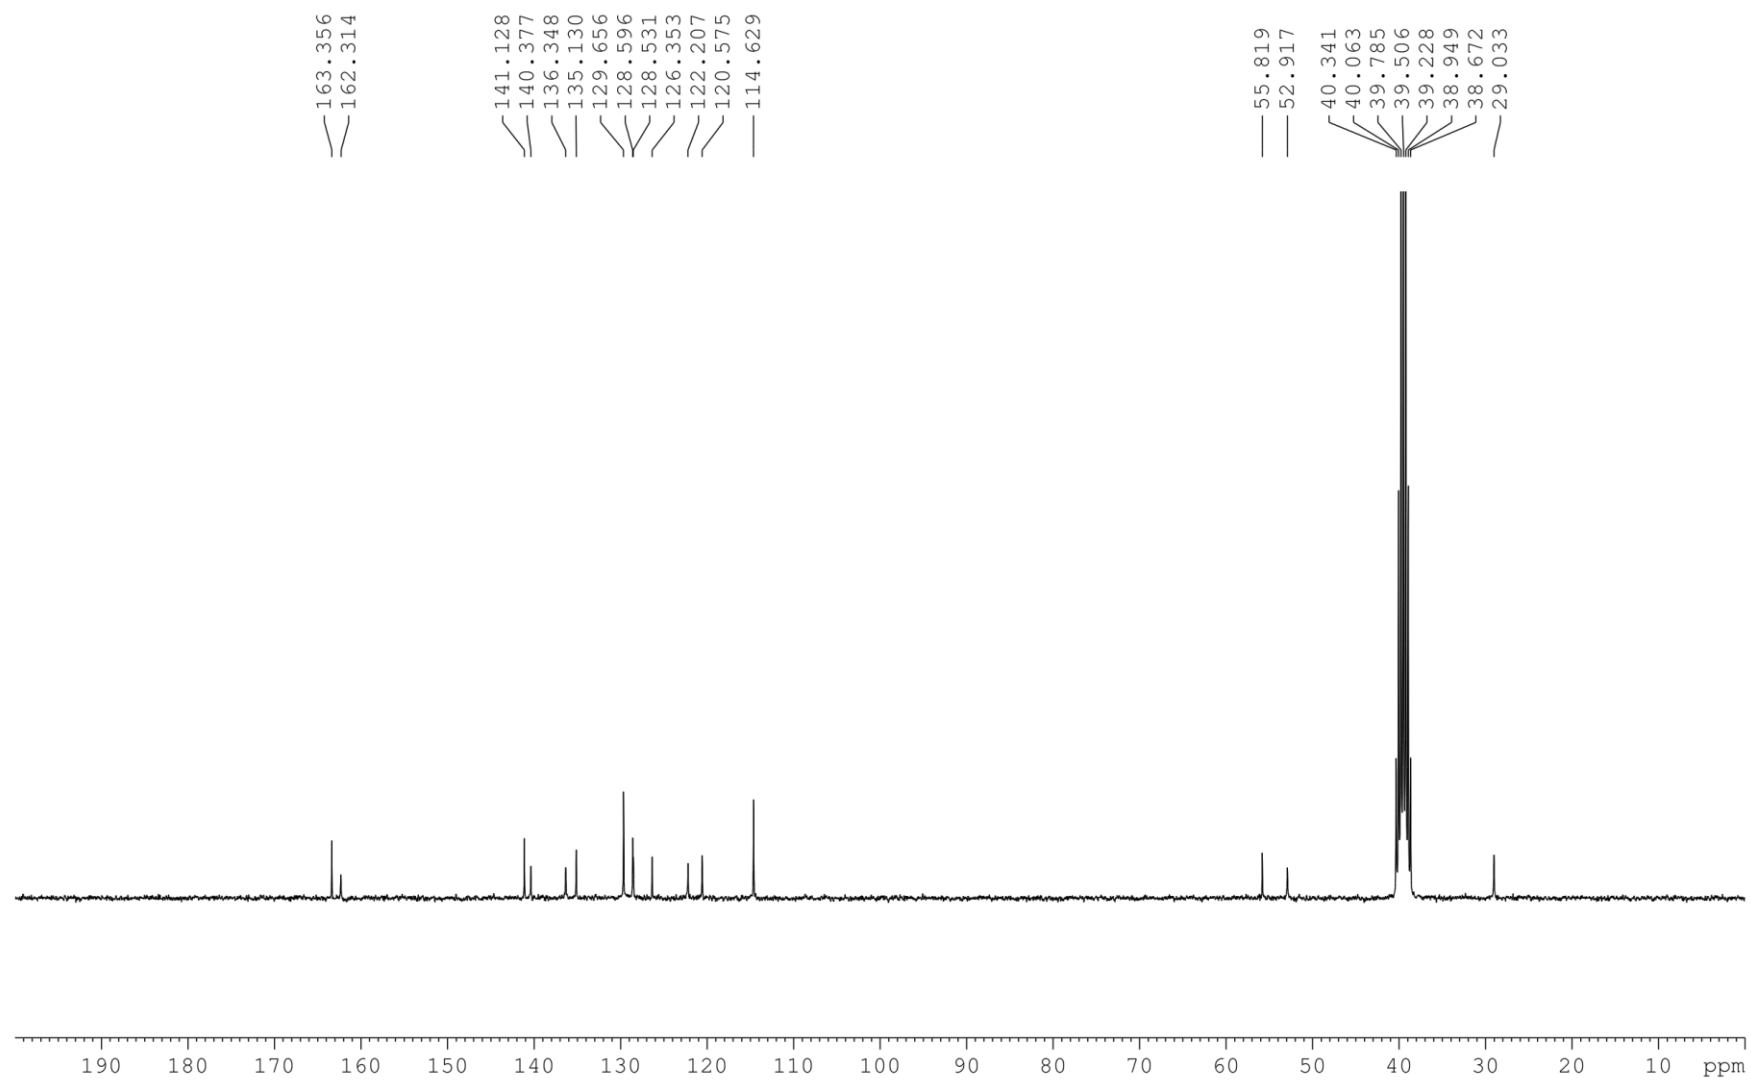

$^{13}\text{C}$  Spectrum for compound **12**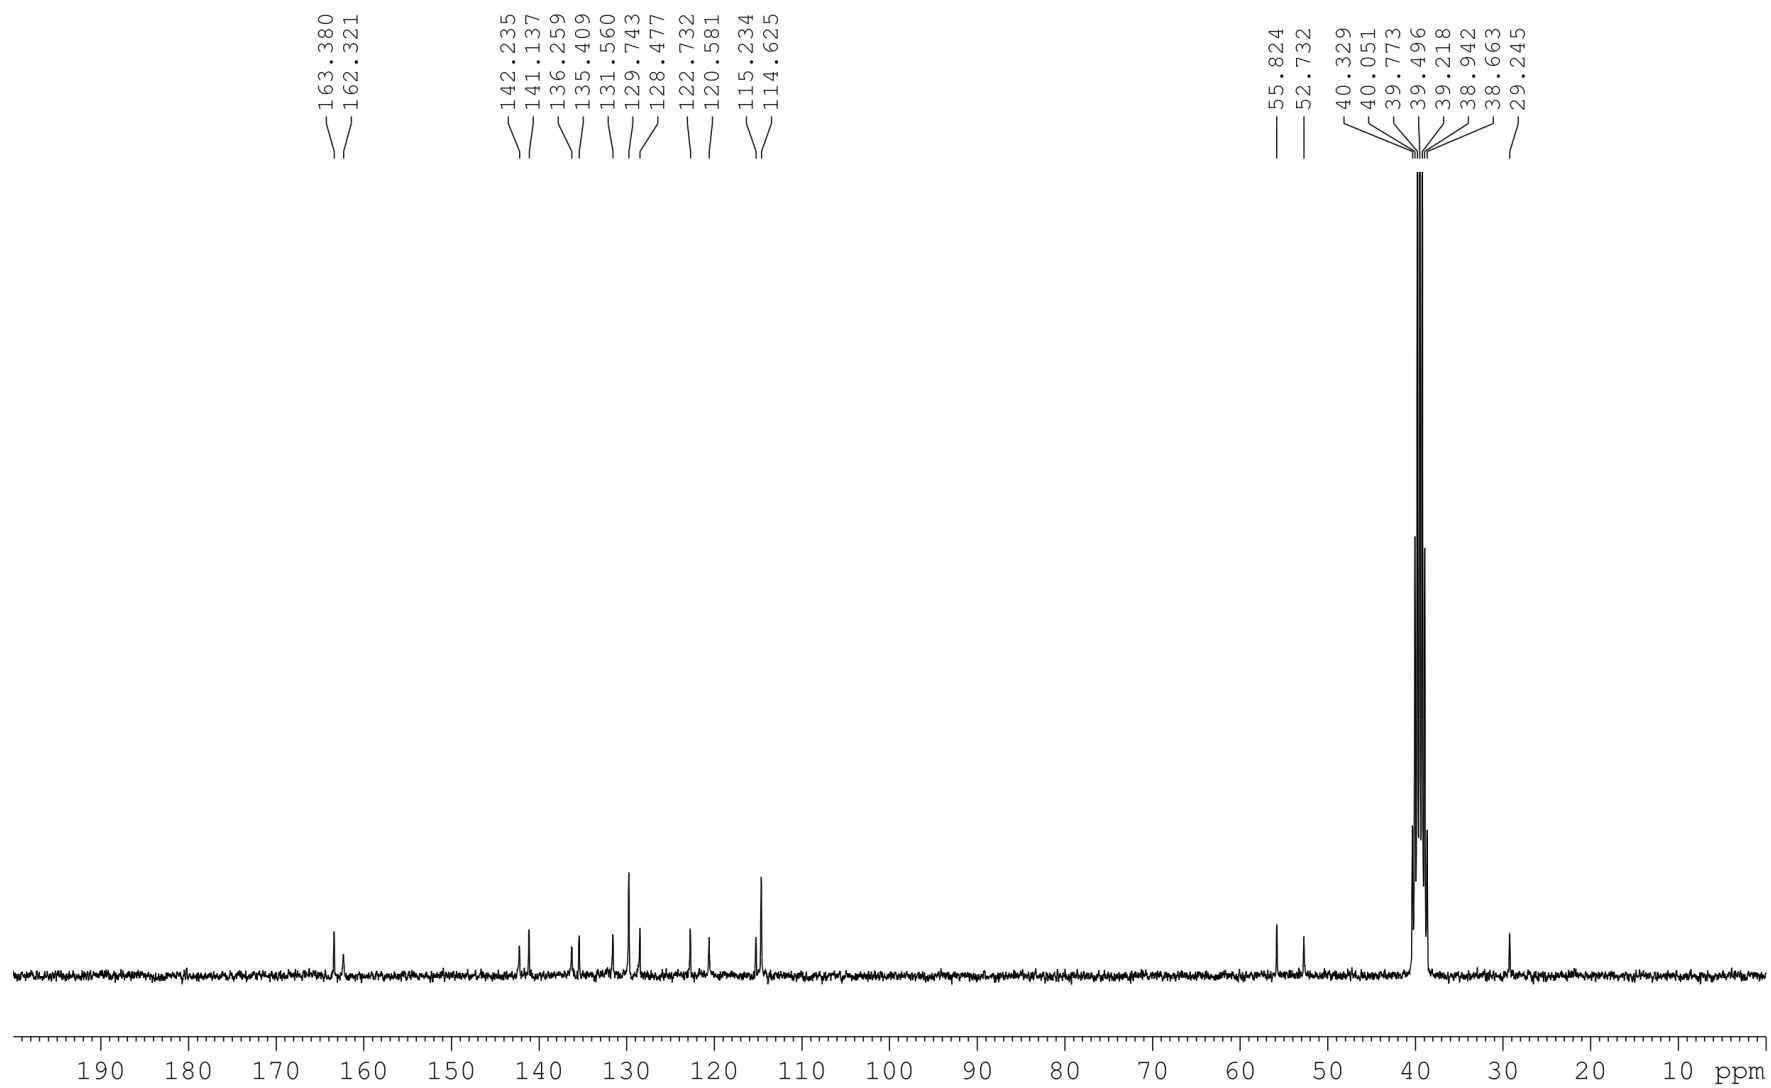

$^{13}\text{C}$  Spectrum for compound **13**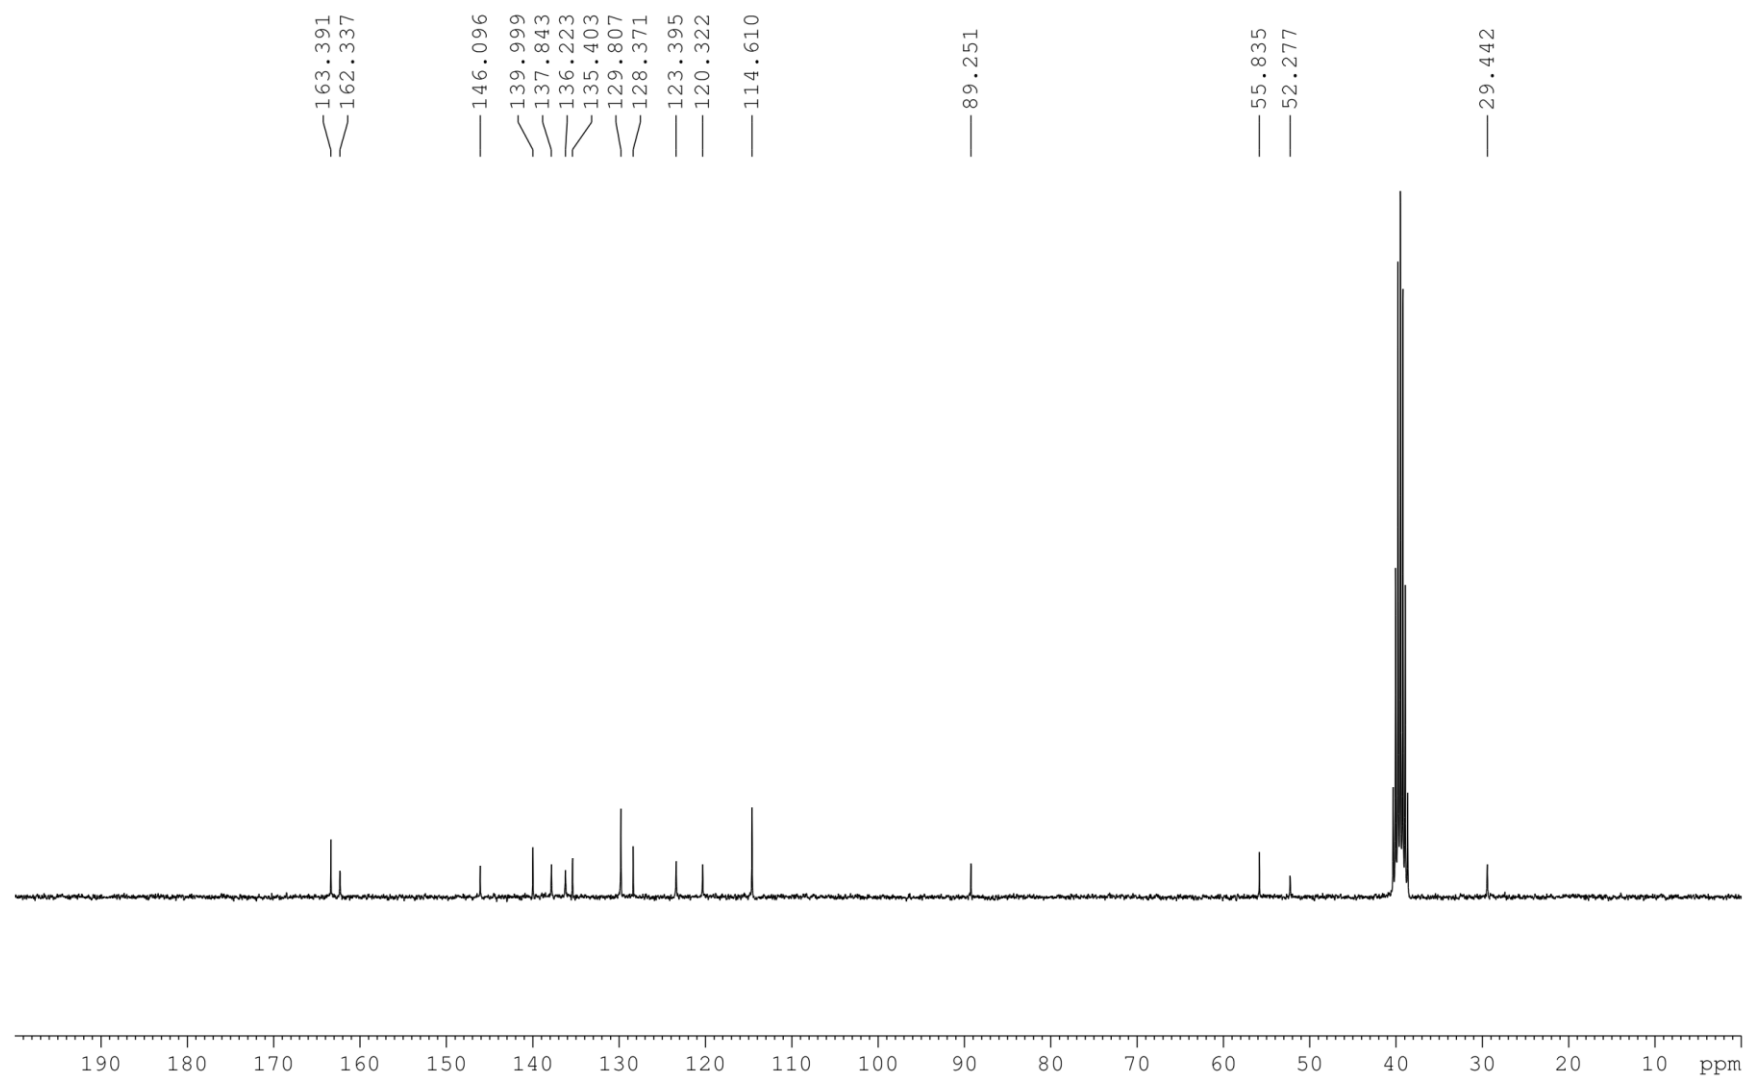

$^{13}\text{C}$  Spectrum for compound 14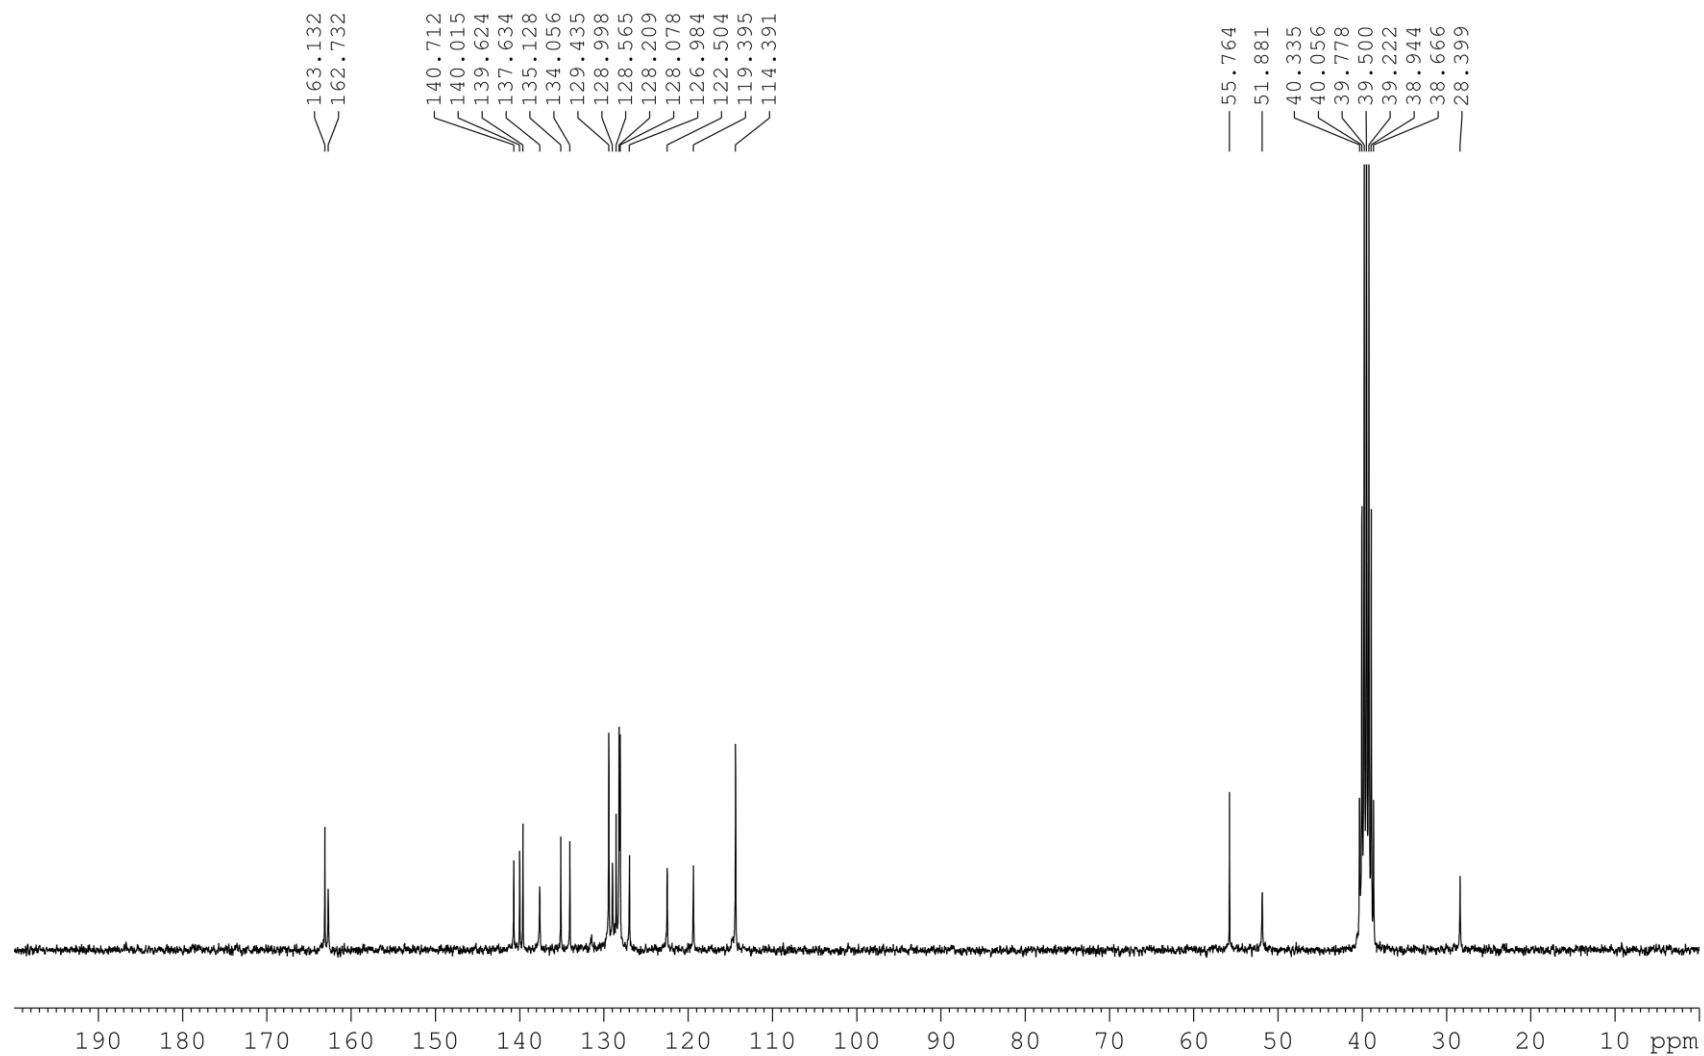

$^{13}\text{C}$  Spectrum for compound **15**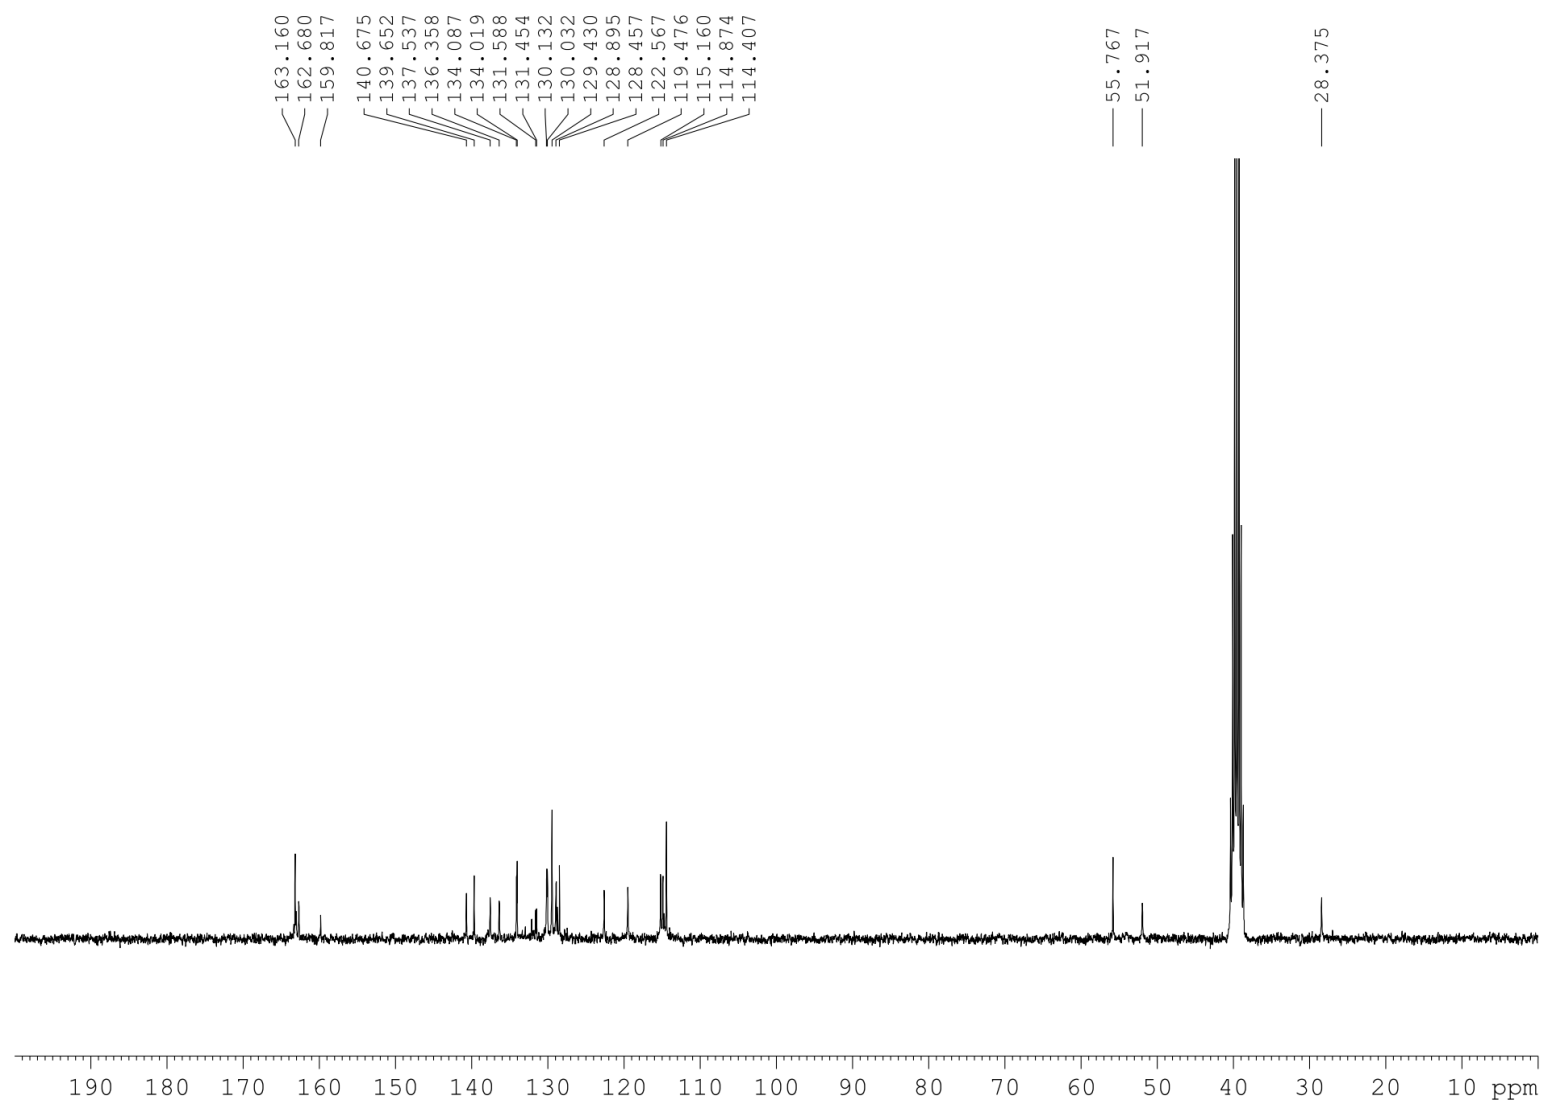

$^{13}\text{C}$  Spectrum for compound 16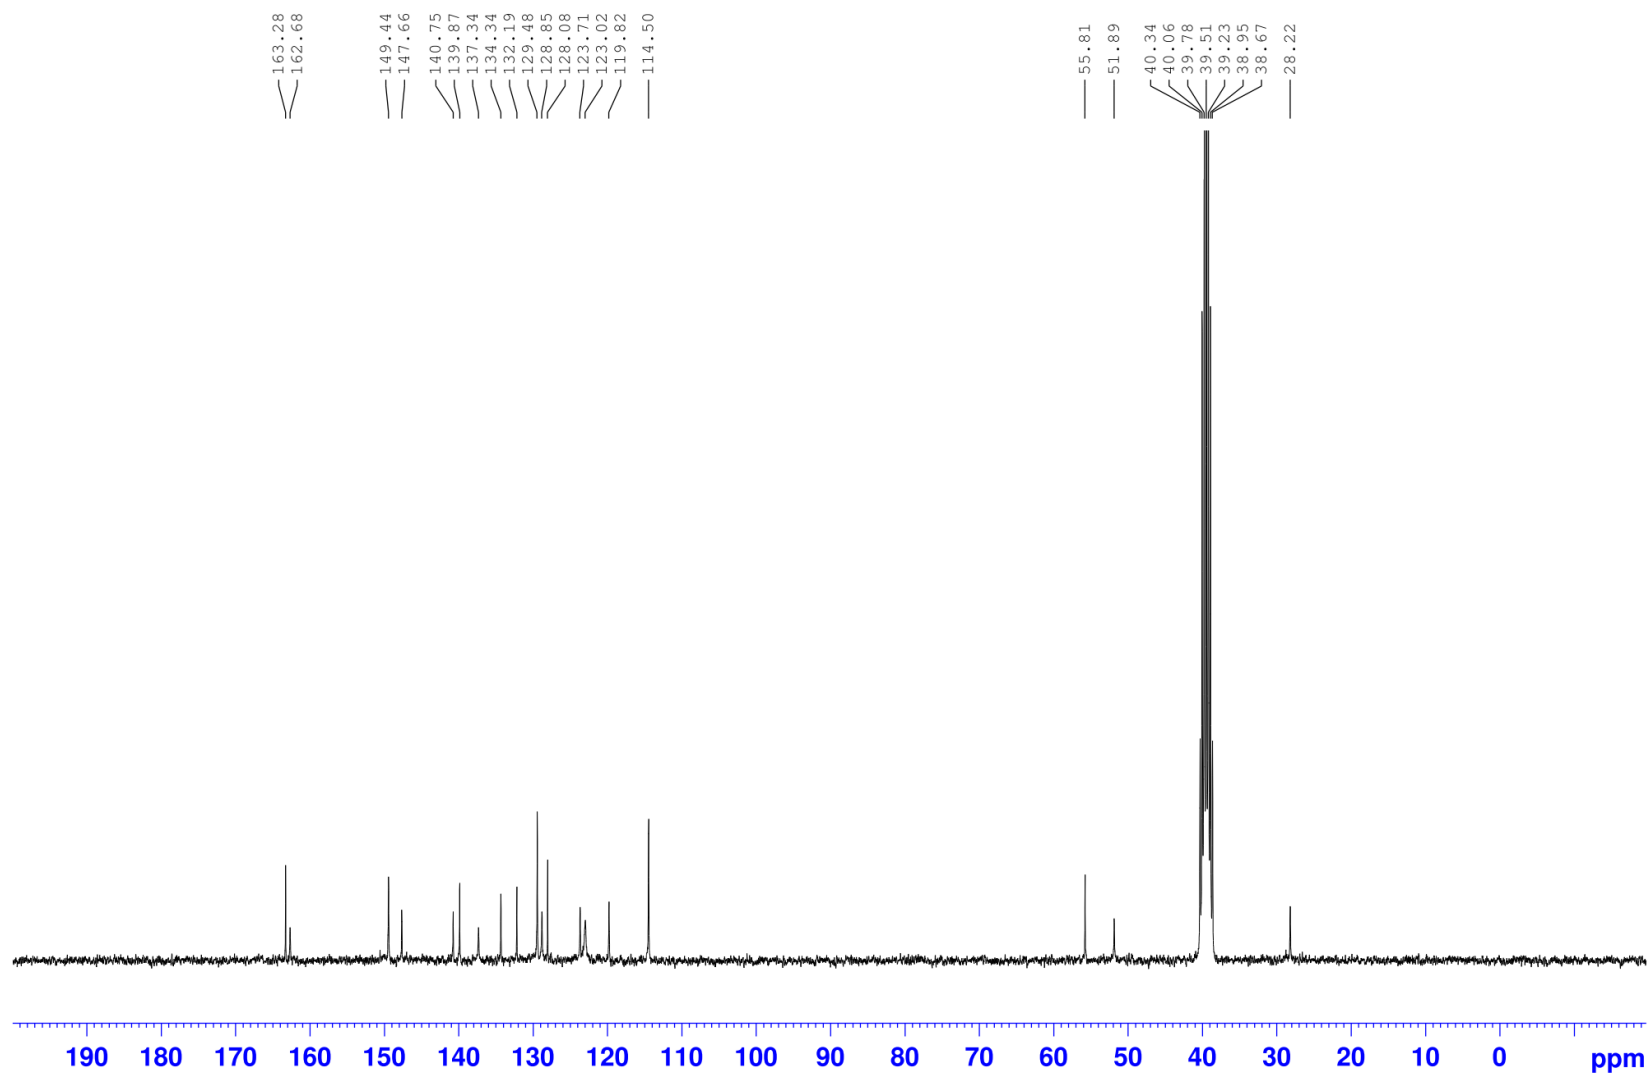

$^{13}\text{C}$  Spectrum for compound **17**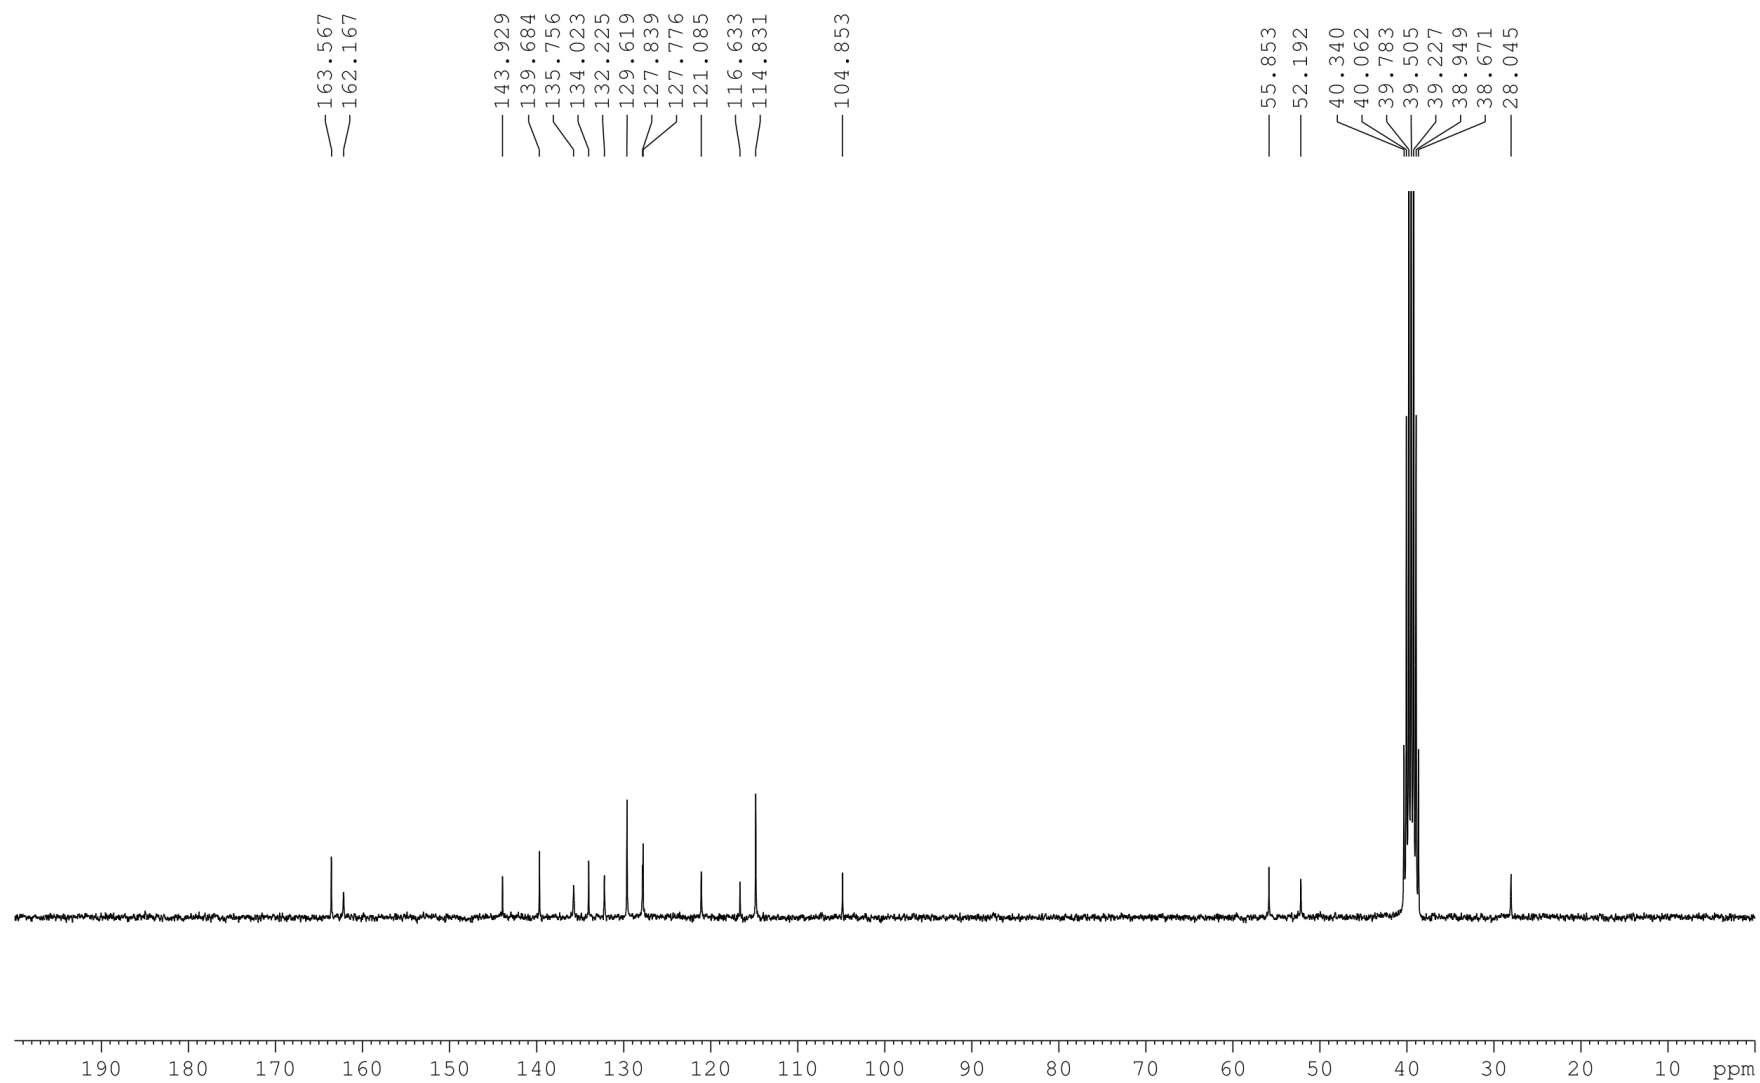

$^{13}\text{C}$  Spectrum for compound 18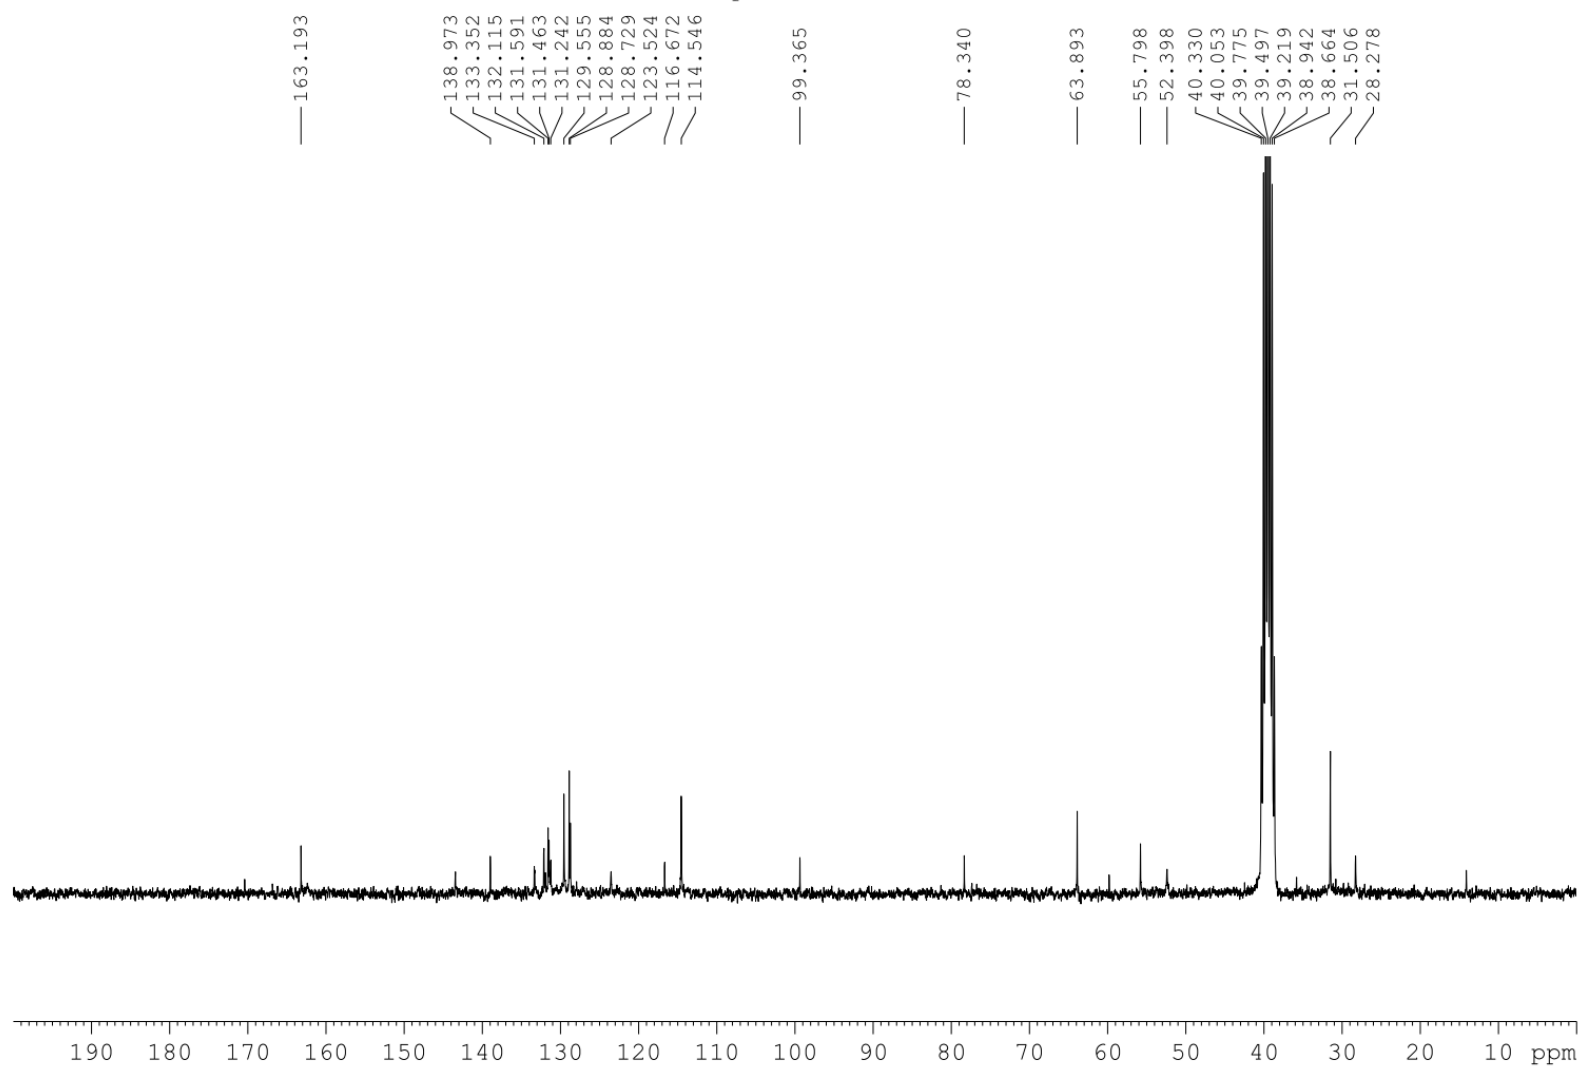

$^{13}\text{C}$  Spectrum for compound 19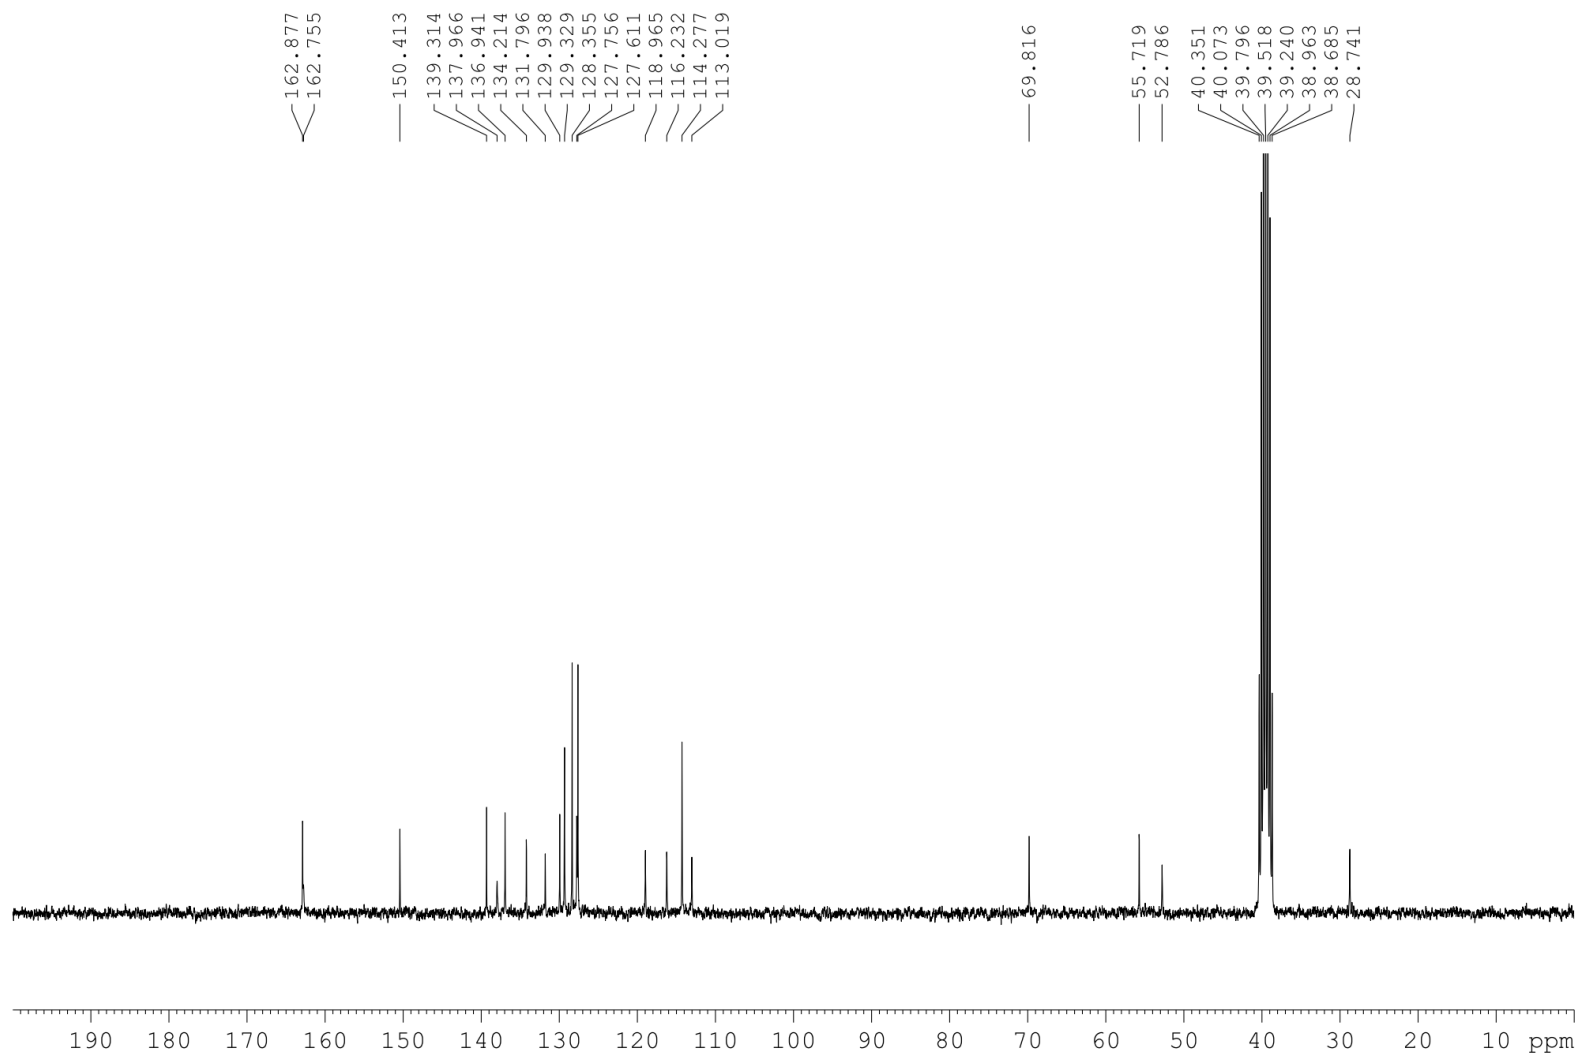

$^{13}\text{C}$  Spectrum for compound 22a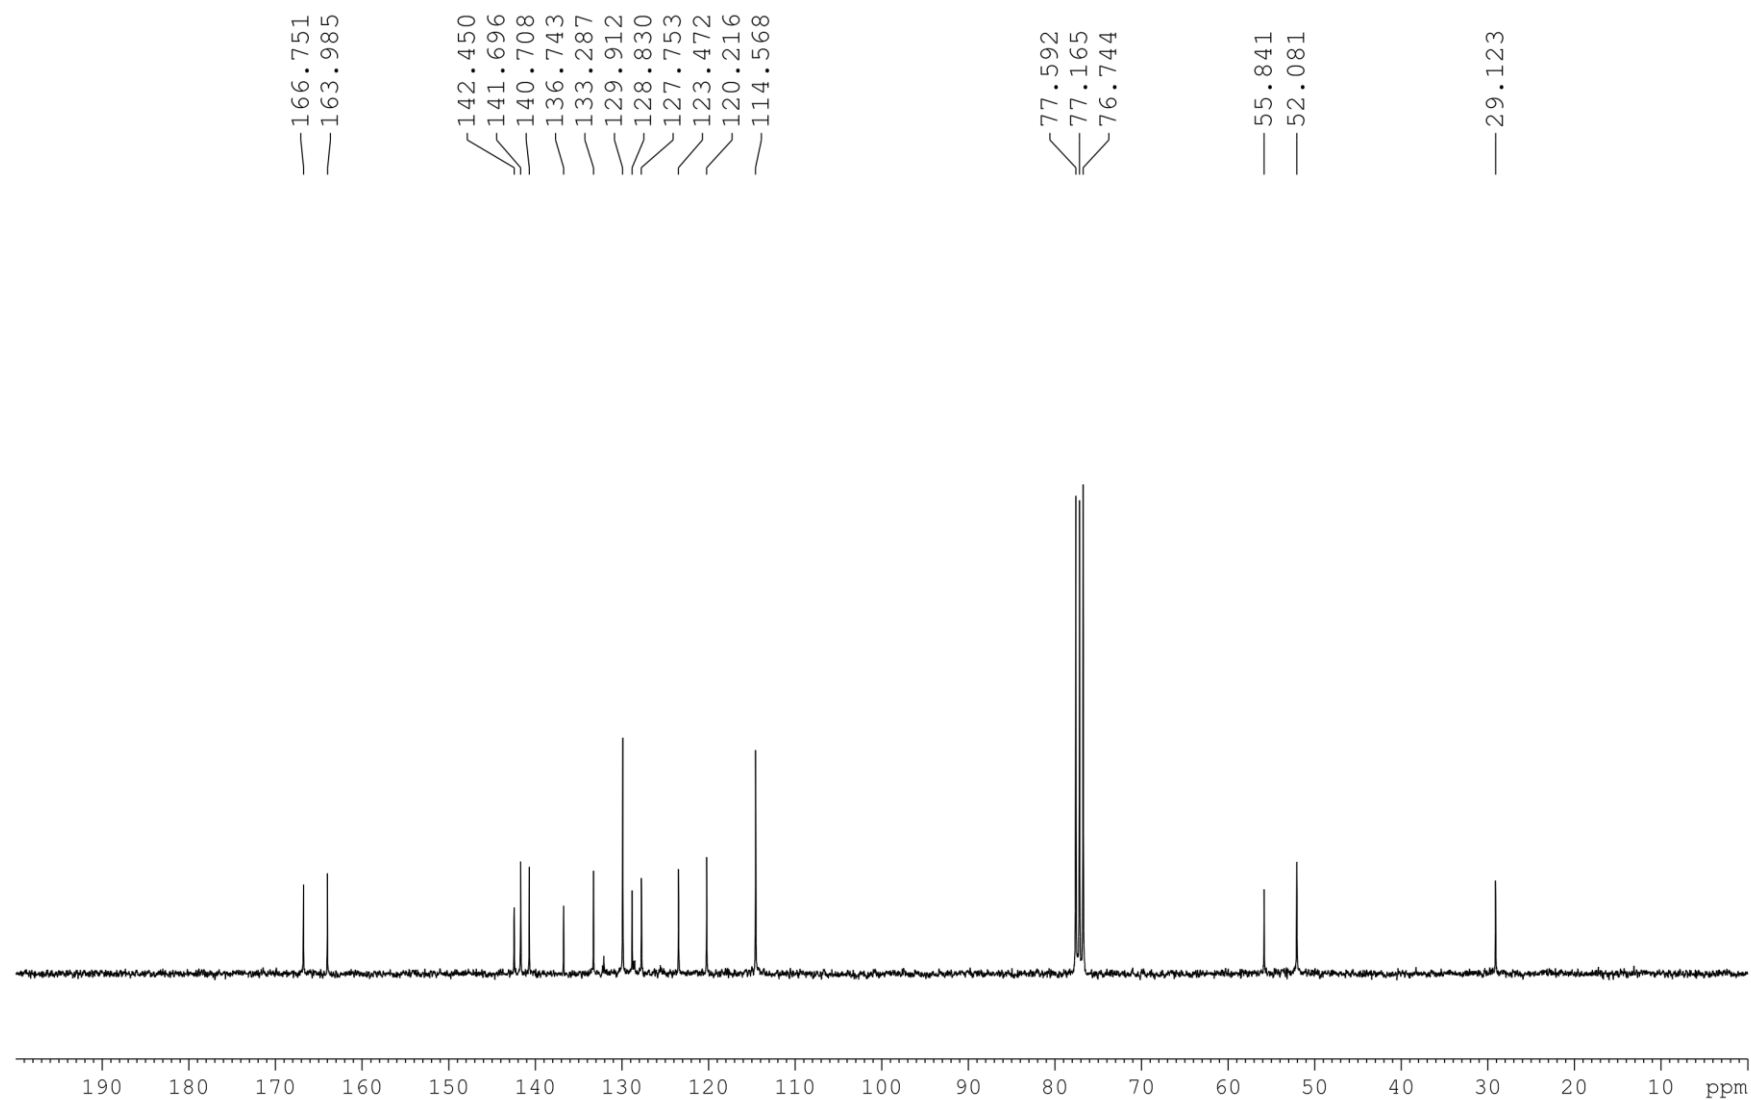

$^{13}\text{C}$  Spectrum for compound 22b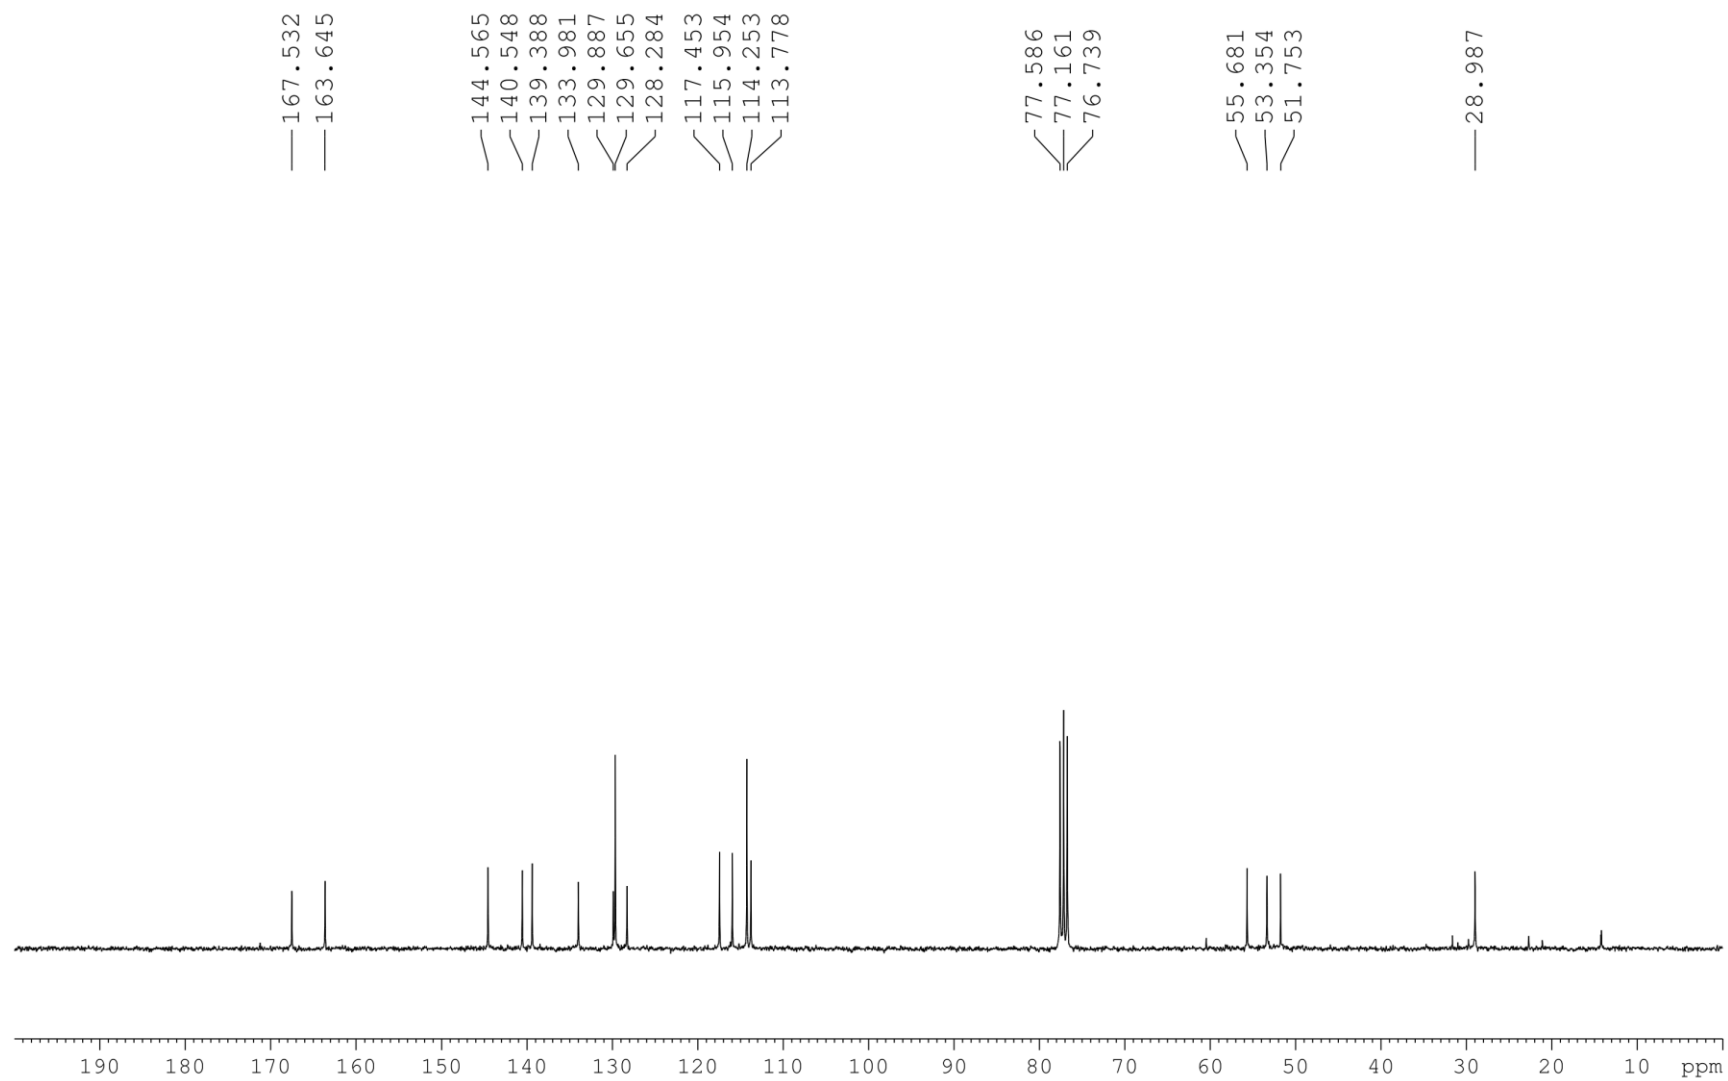

$^{13}\text{C}$  Spectrum for compound 22c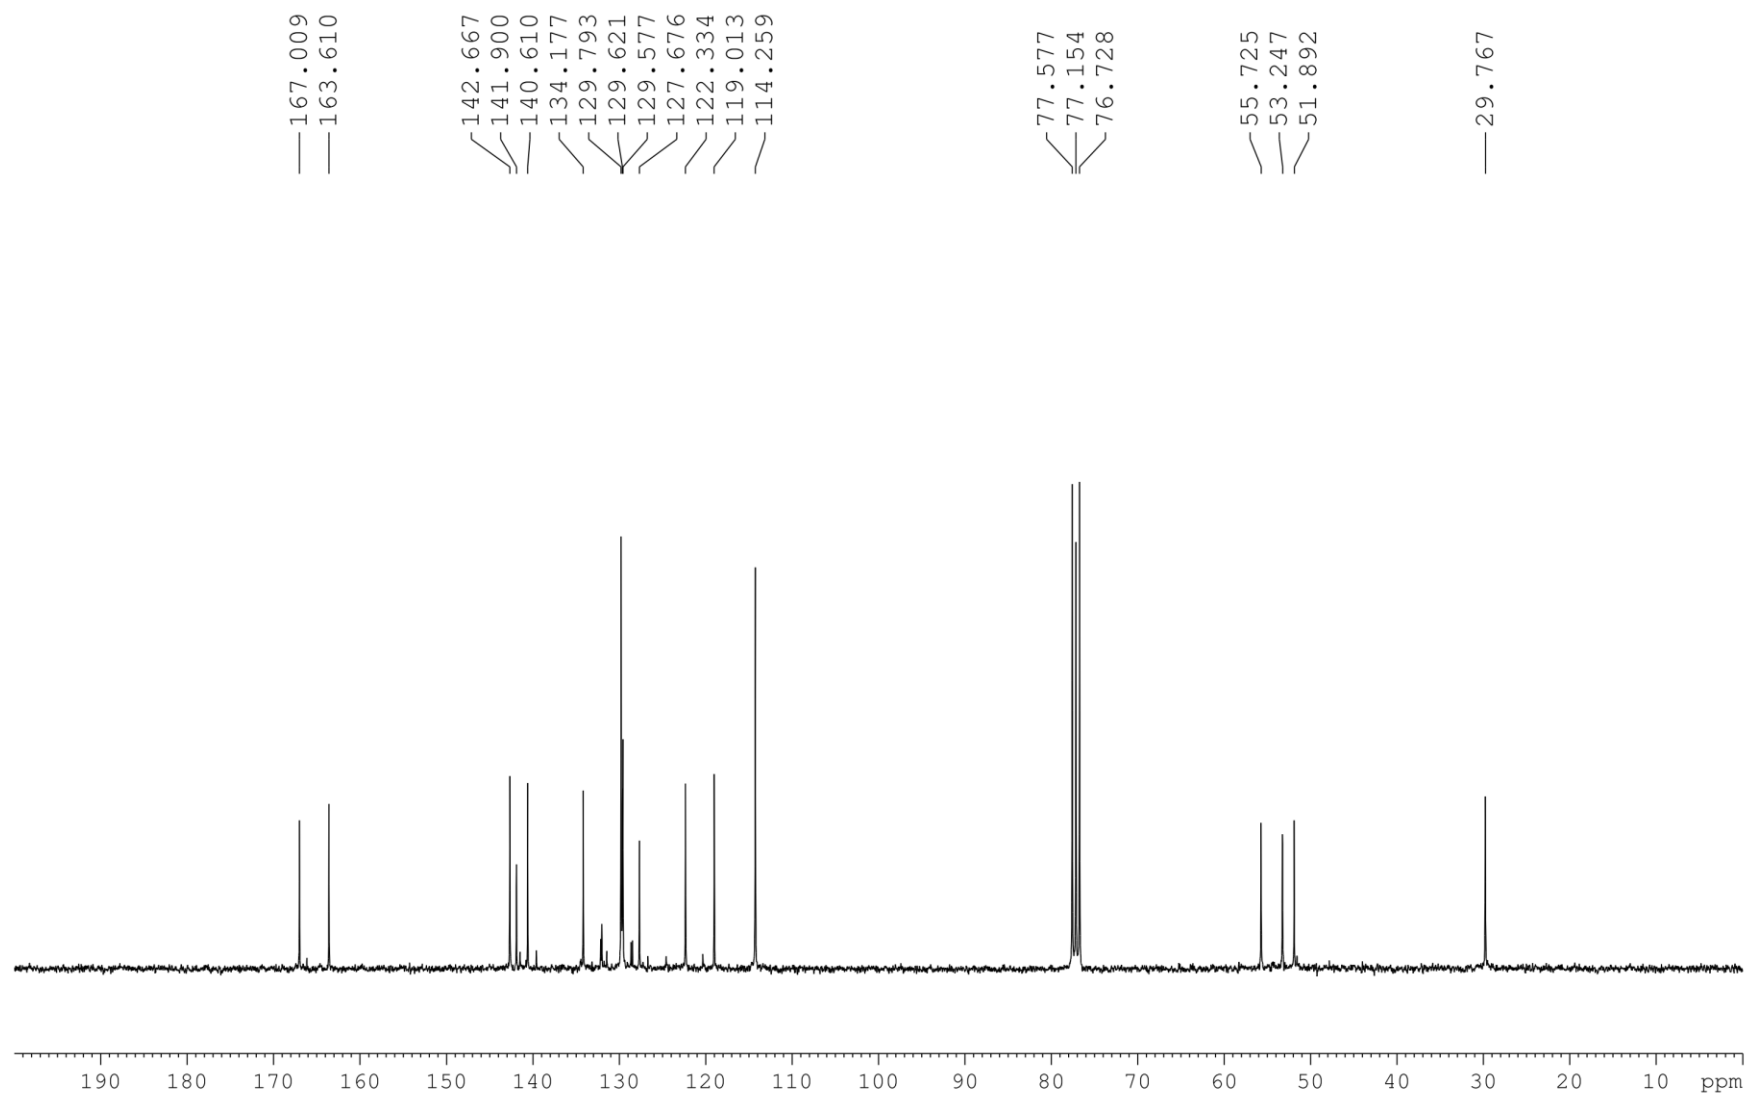

$^{13}\text{C}$  Spectrum for compound 22d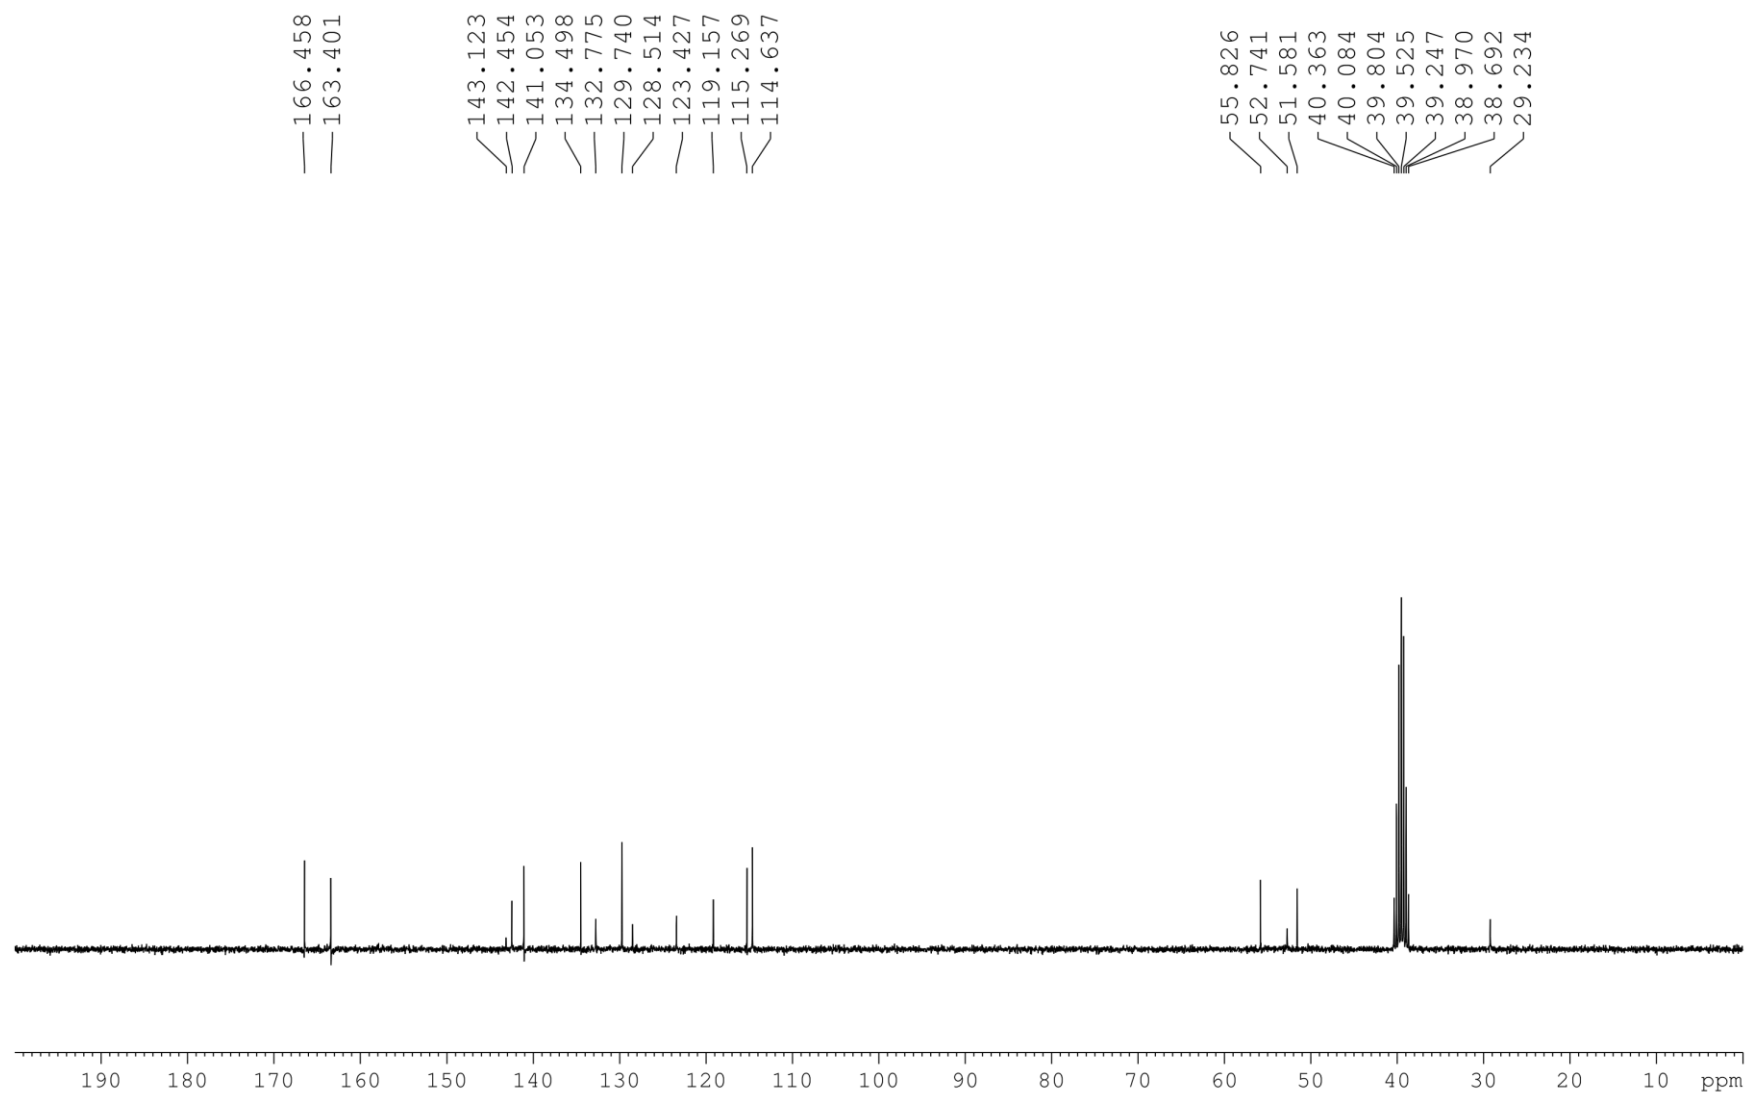

$^{13}\text{C}$  Spectrum for compound 22e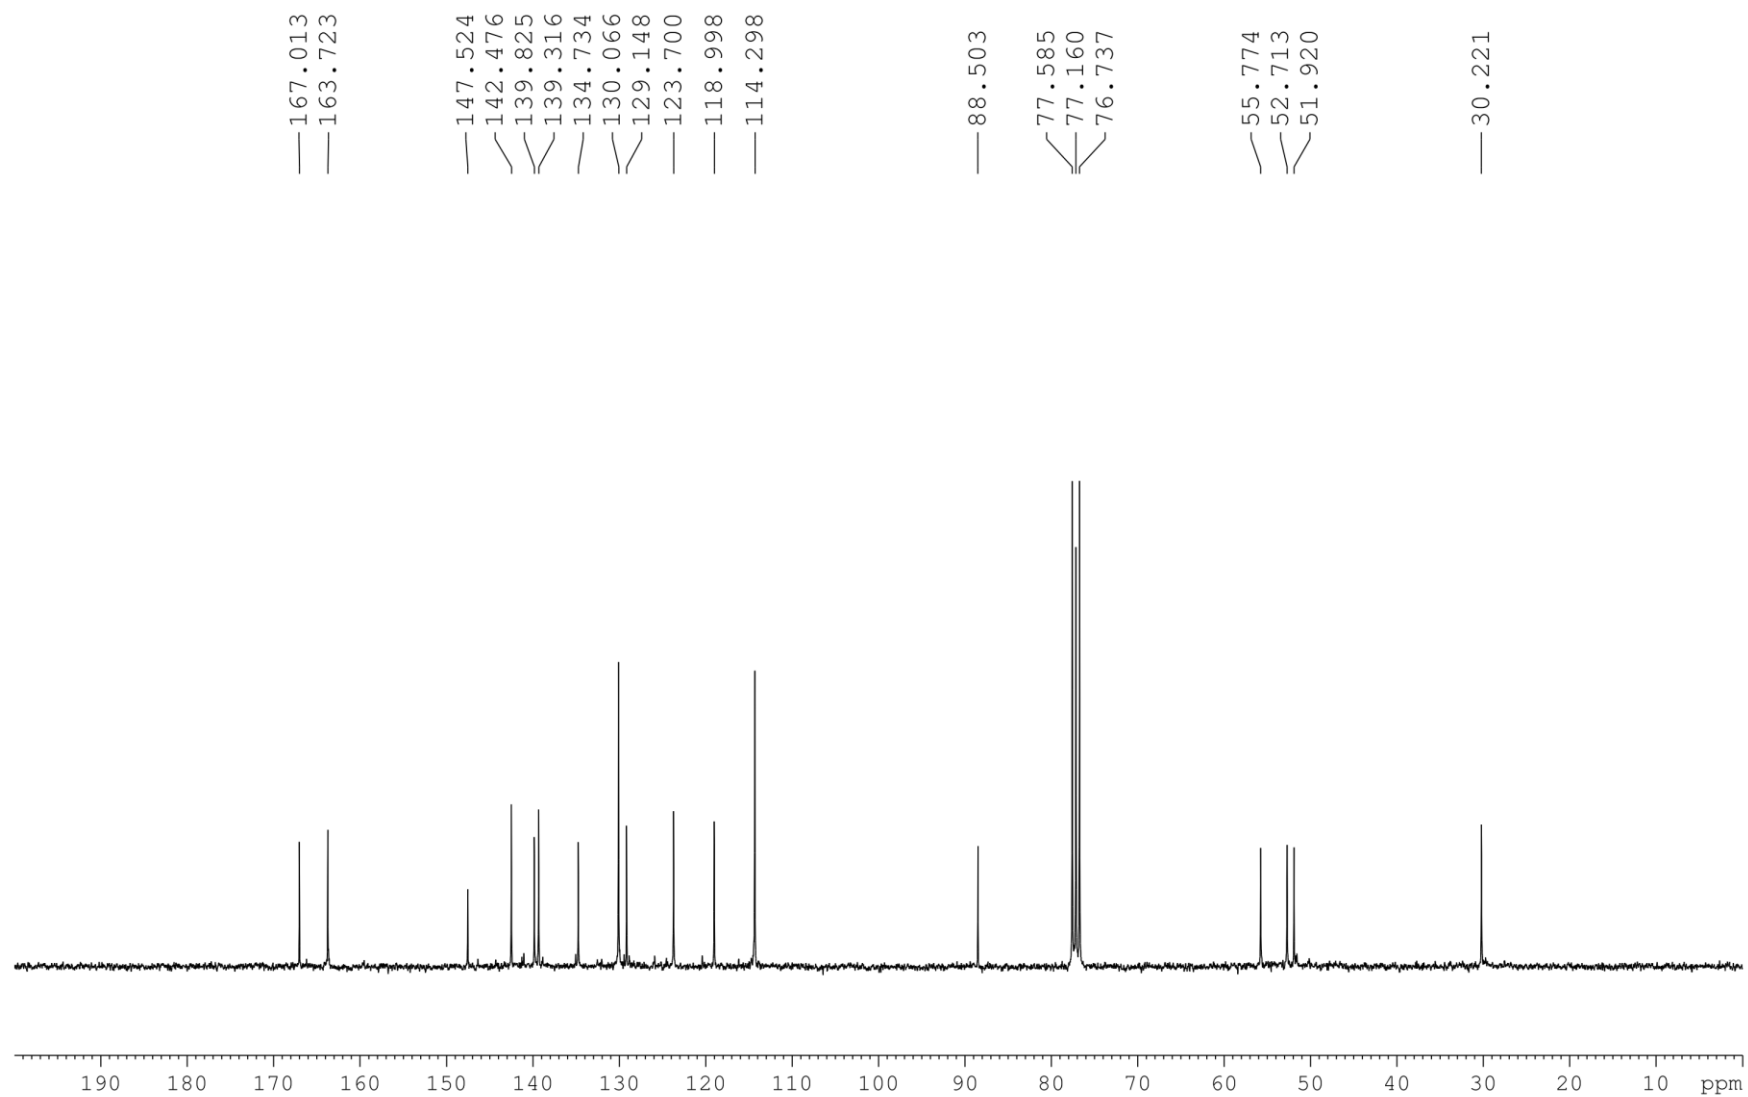

$^{13}\text{C}$  Spectrum for compound 22i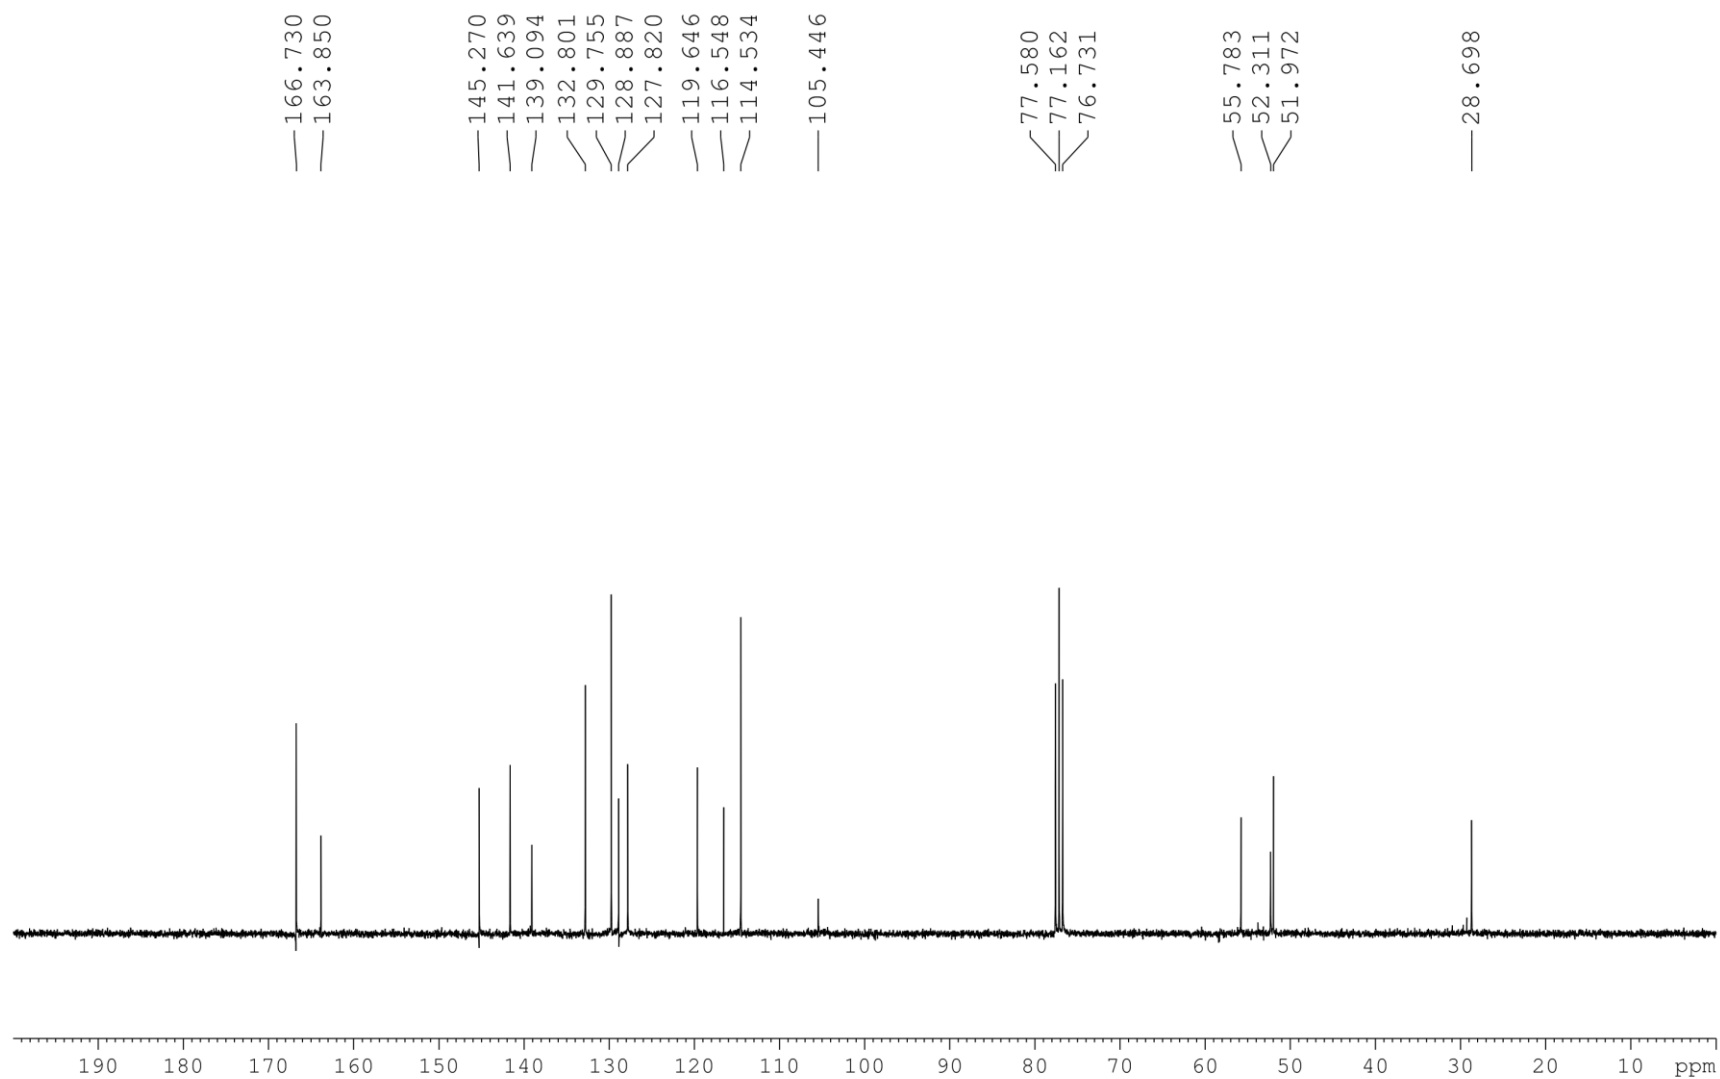

$^{13}\text{C}$  Spectrum for compound 22j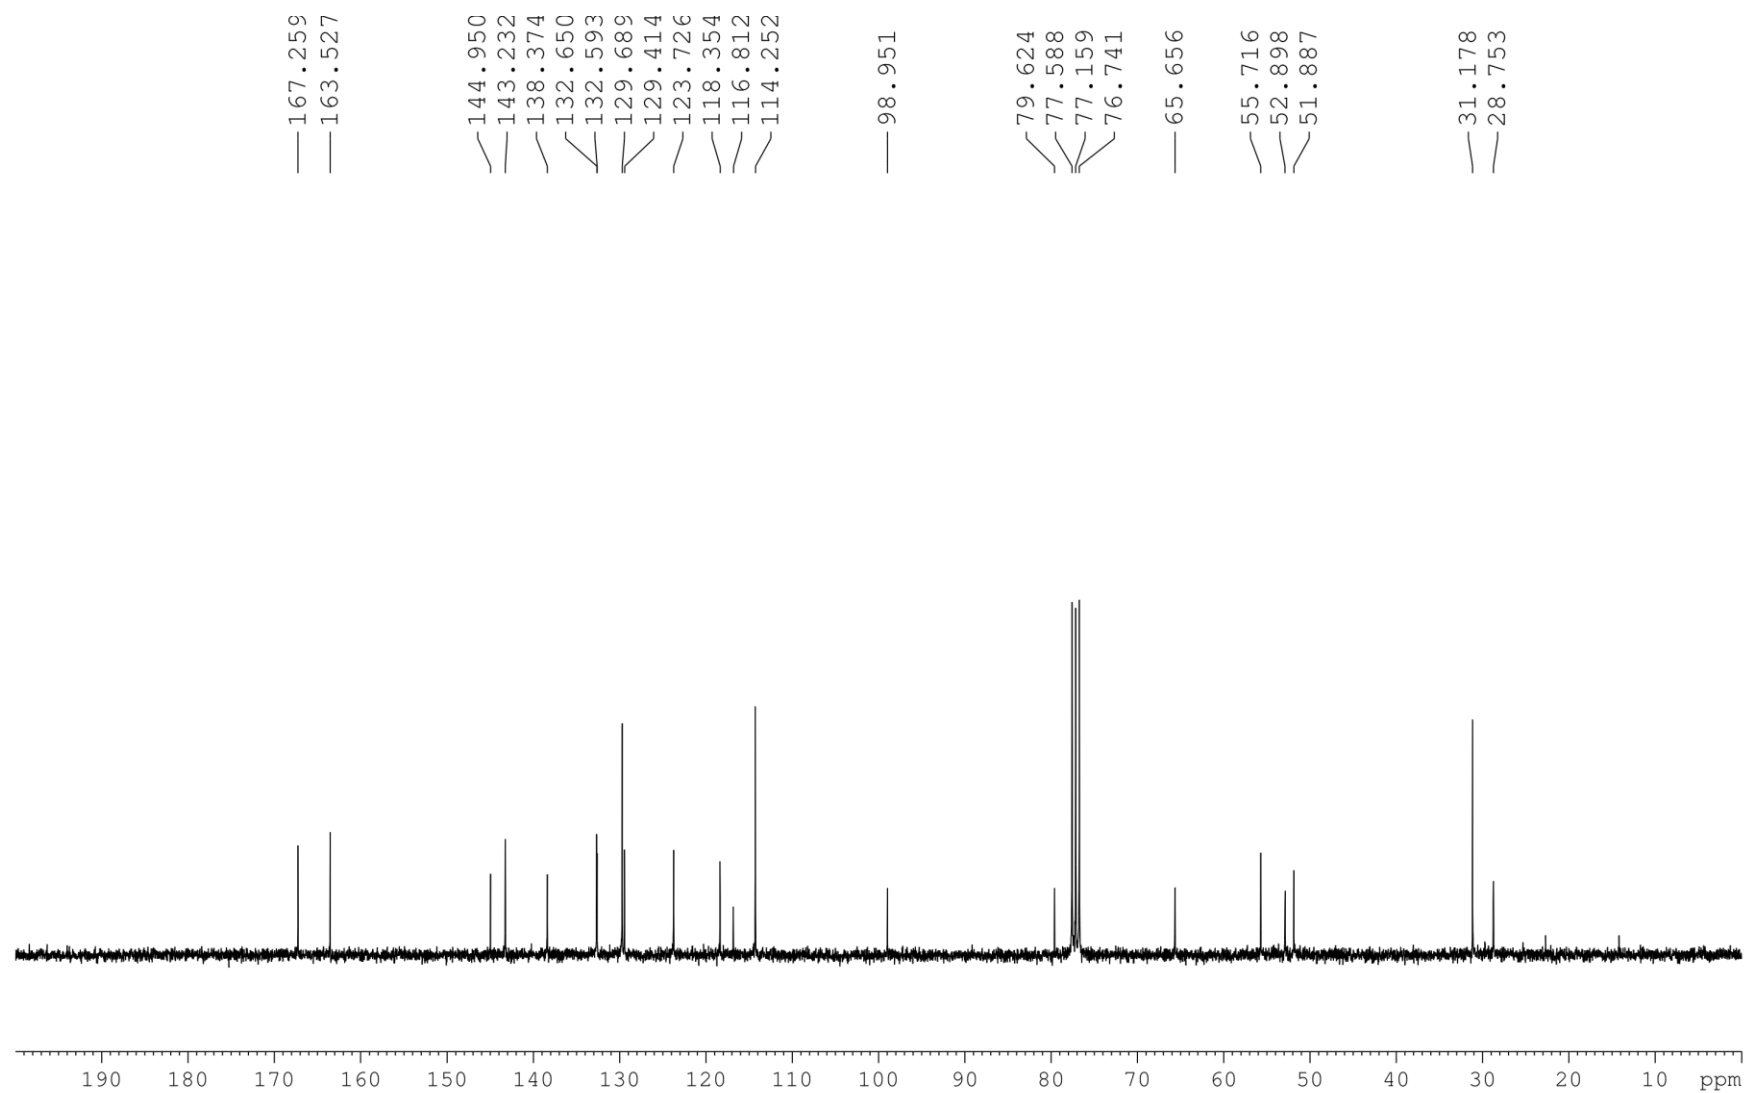

$^{13}\text{C}$  Spectrum for compound 22k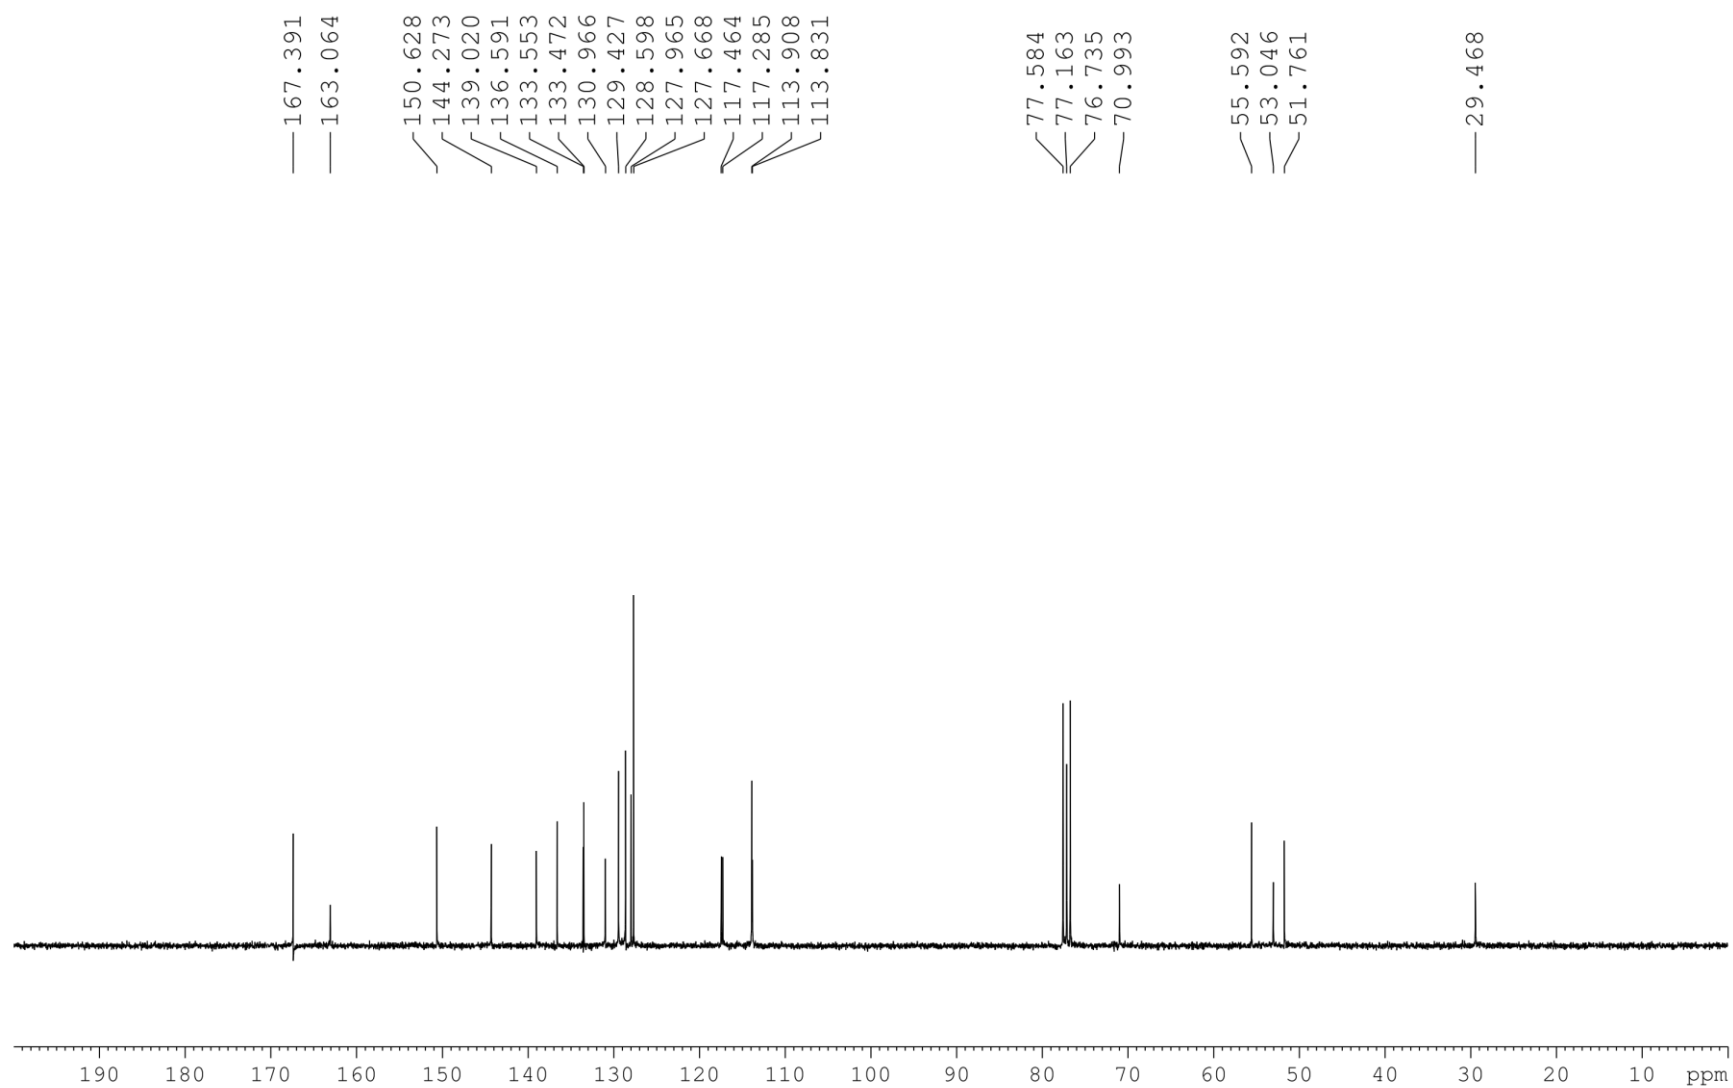

$^{13}\text{C}$  Spectrum for compound 25c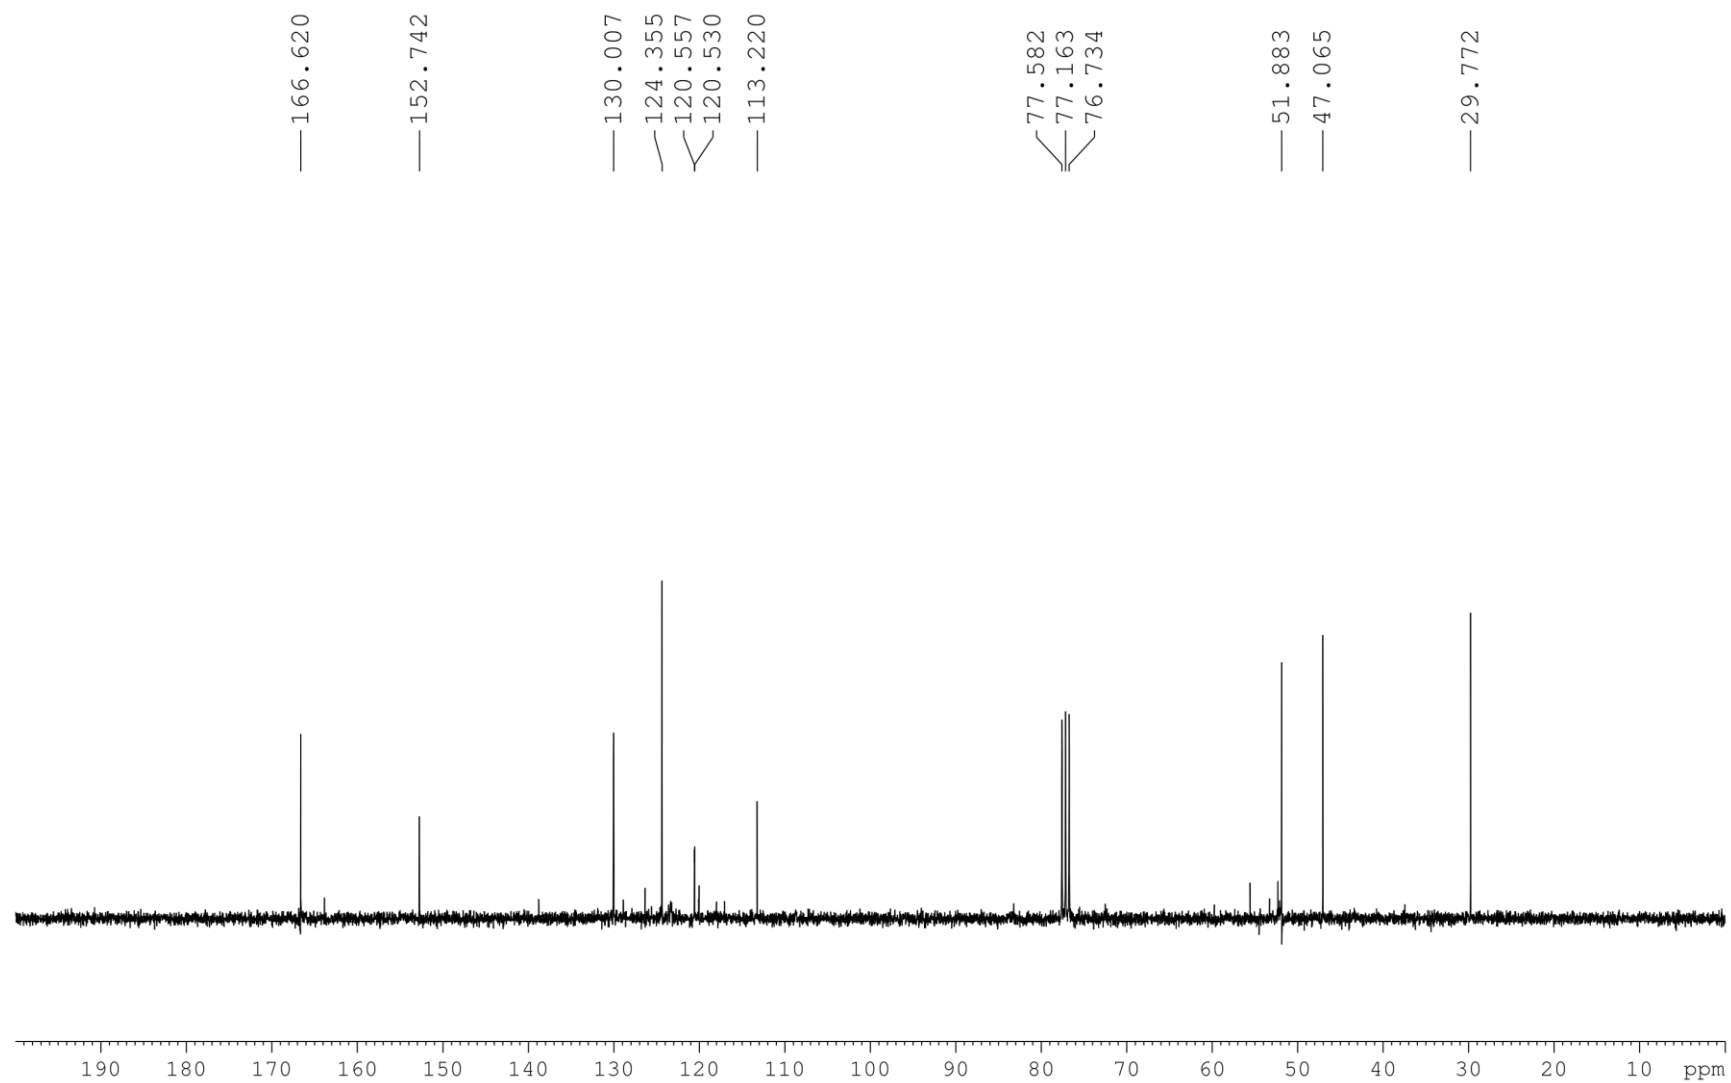

$^{13}\text{C}$  Spectrum for compound 25d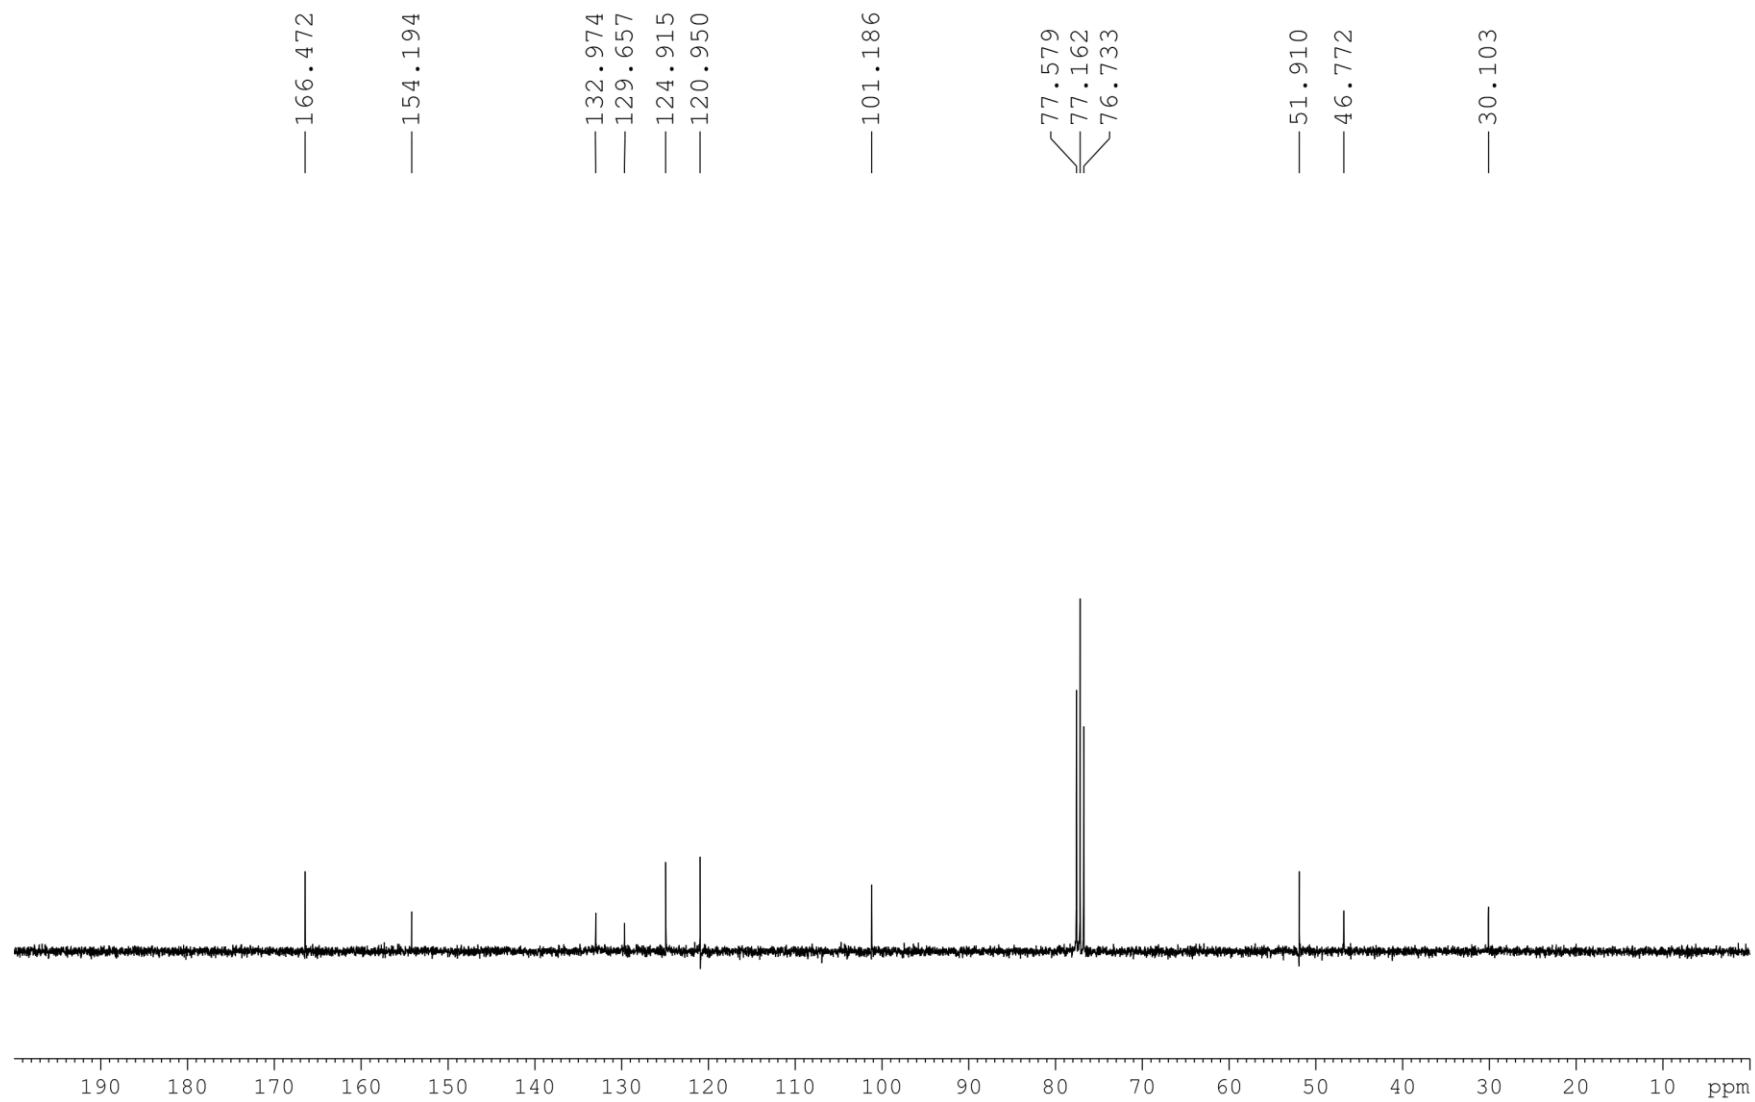

$^{13}\text{C}$  Spectrum for compound 25e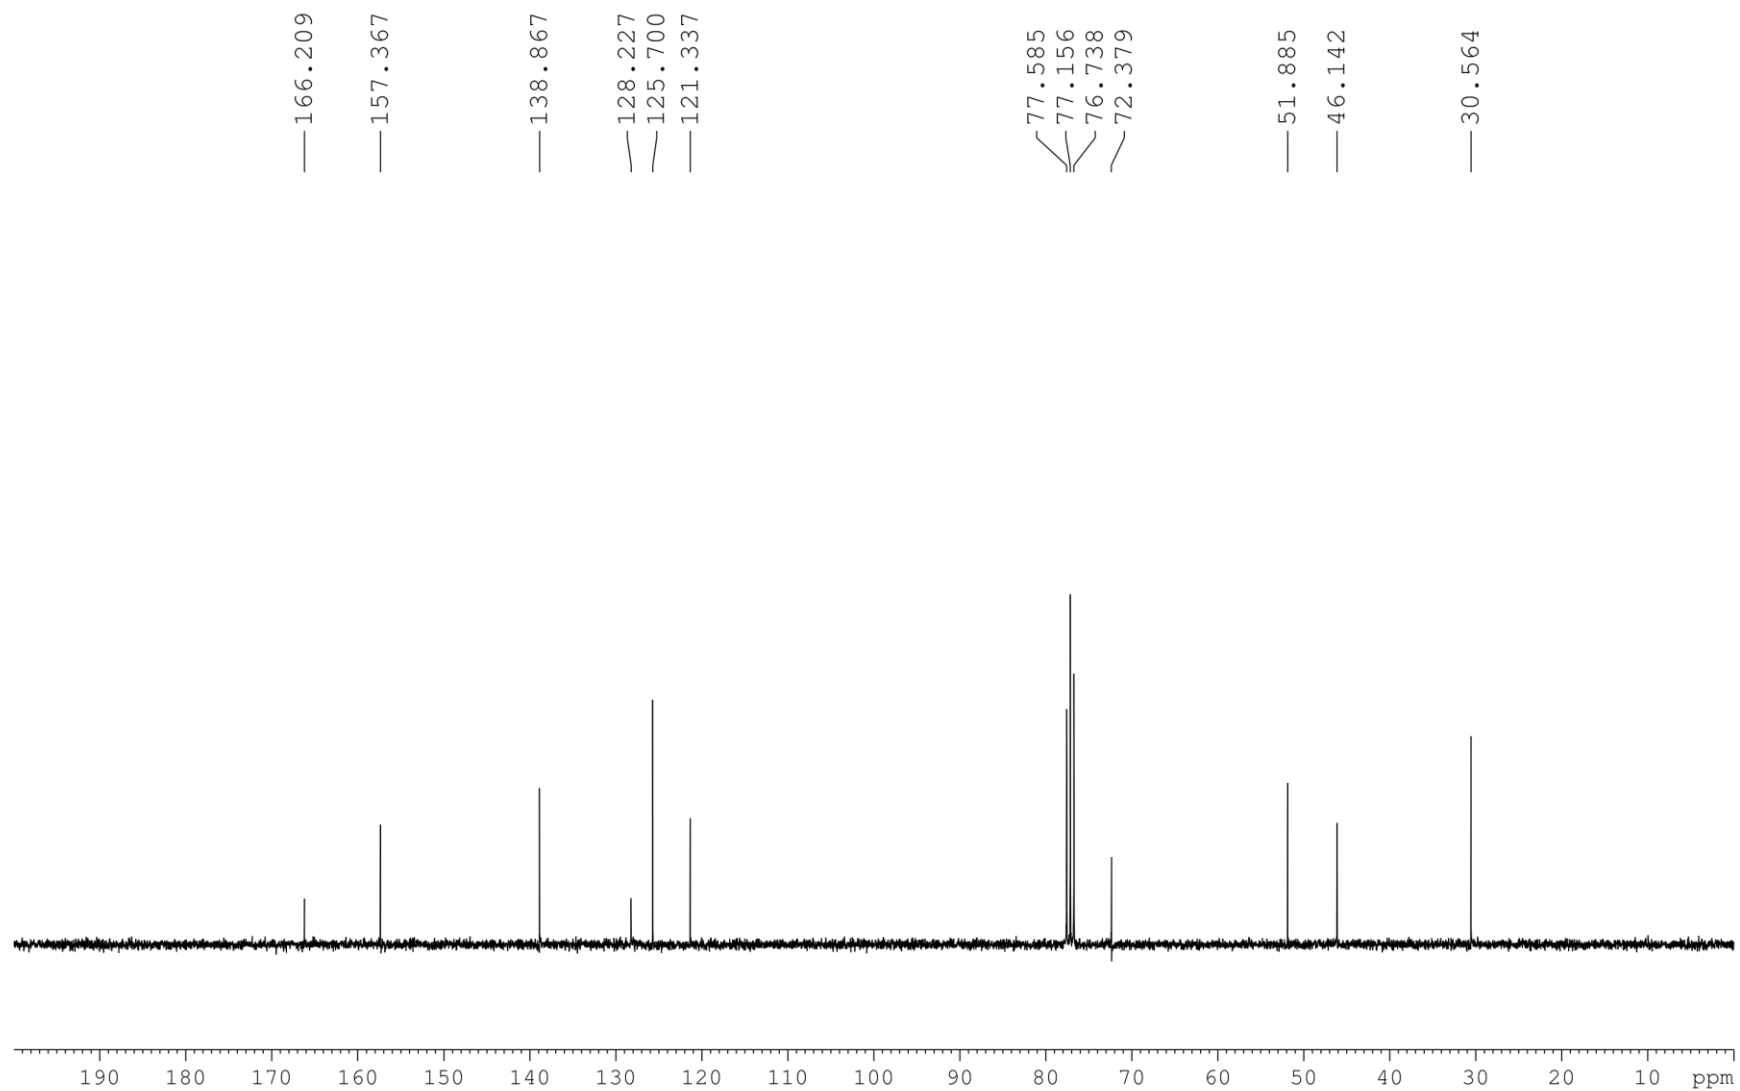

$^{13}\text{C}$  Spectrum for compound 26c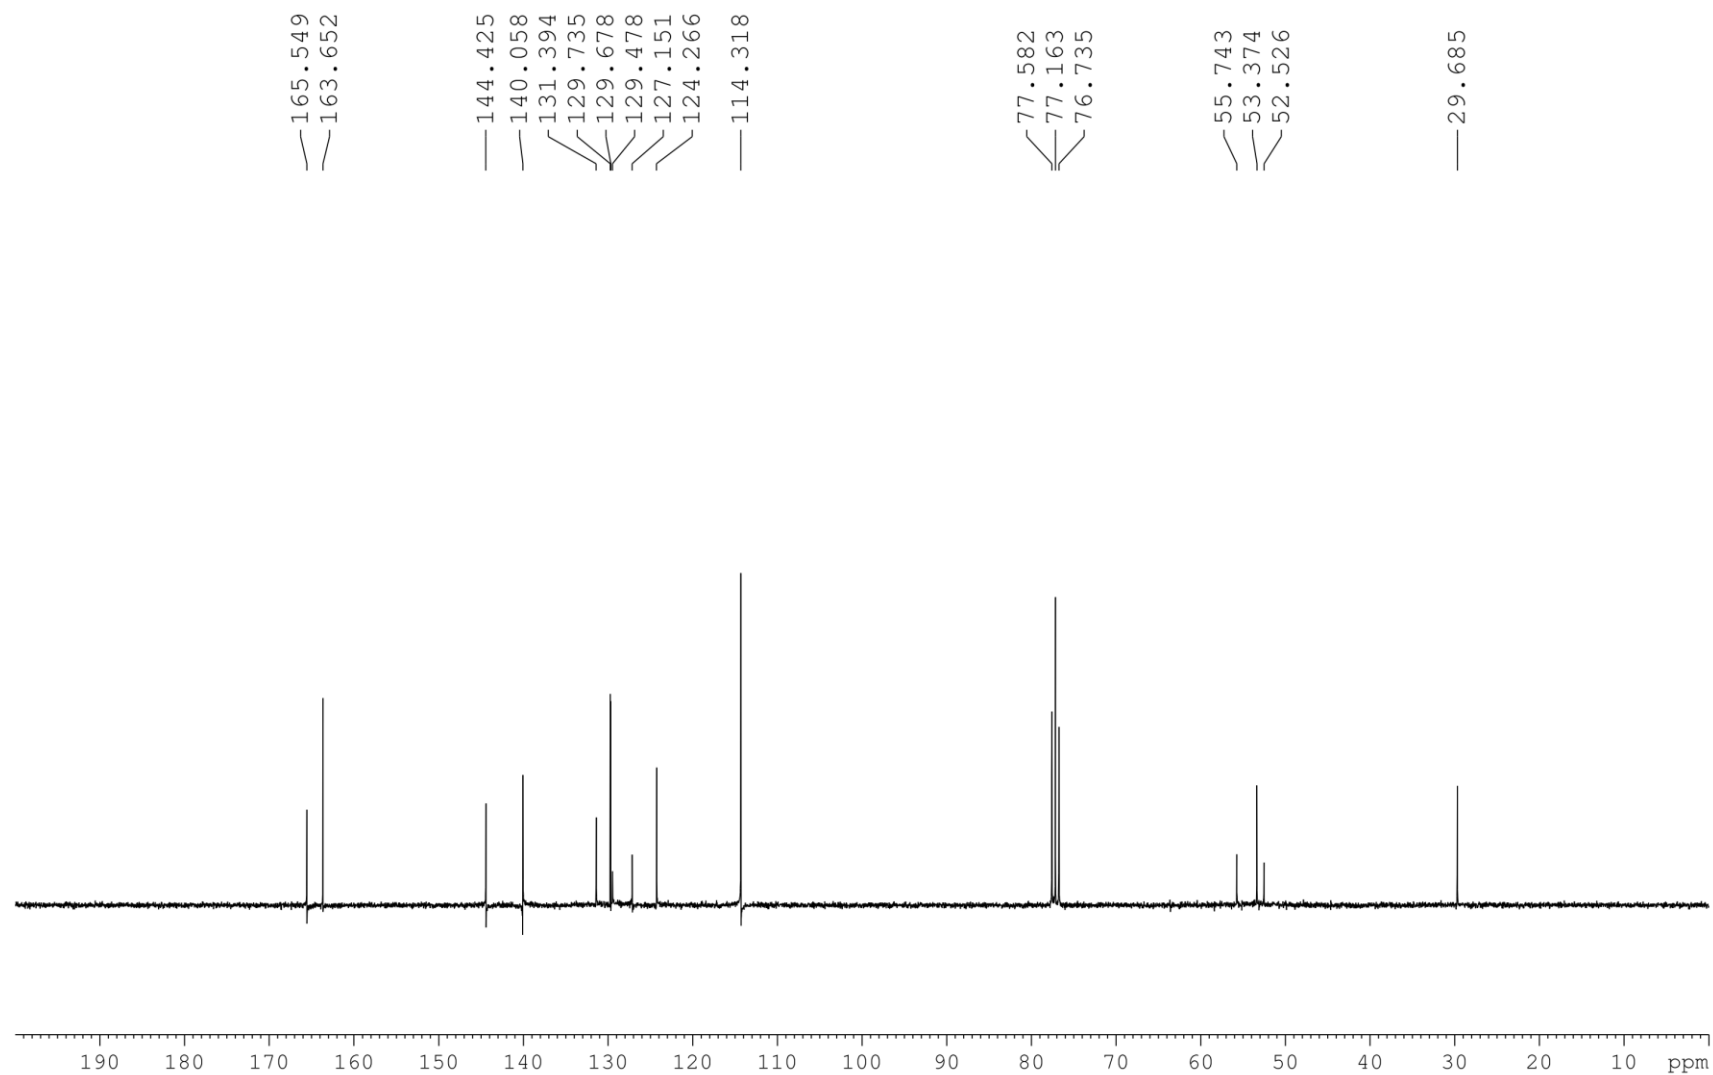

$^{13}\text{C}$  Spectrum for compound 26d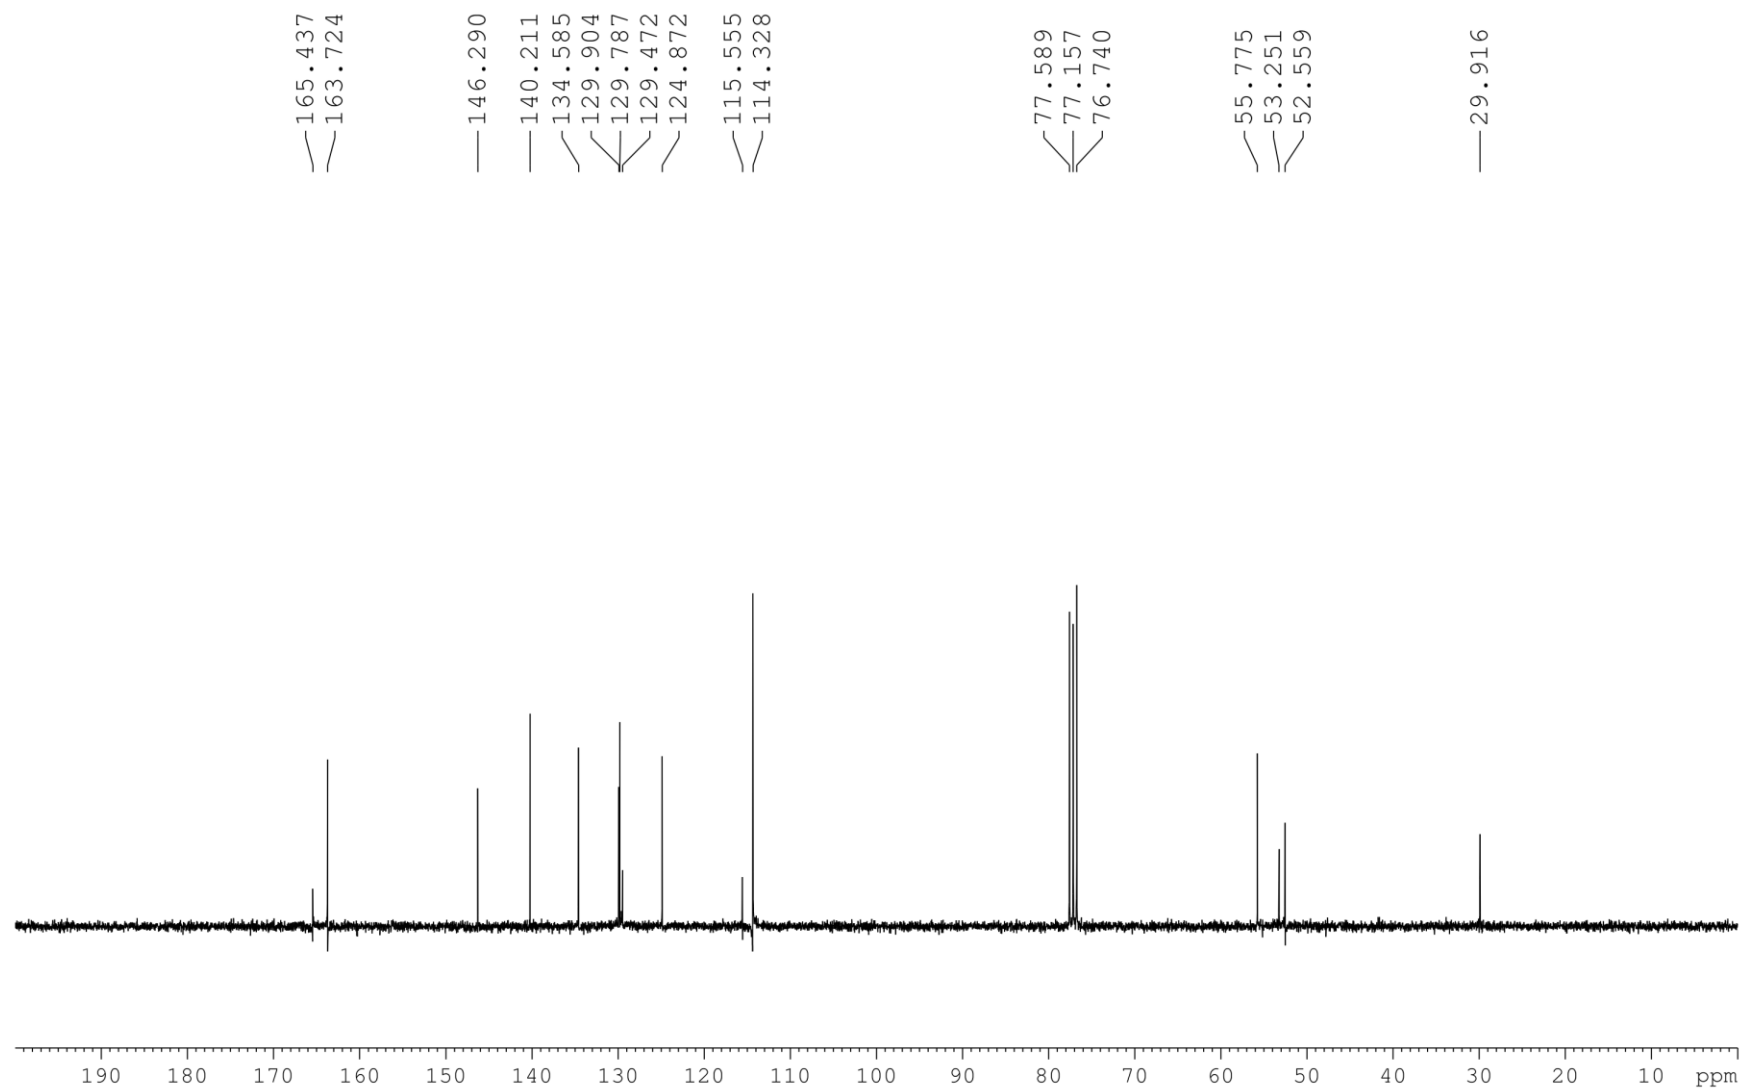

**$^{13}\text{C}$  Spectrum for compound 26e**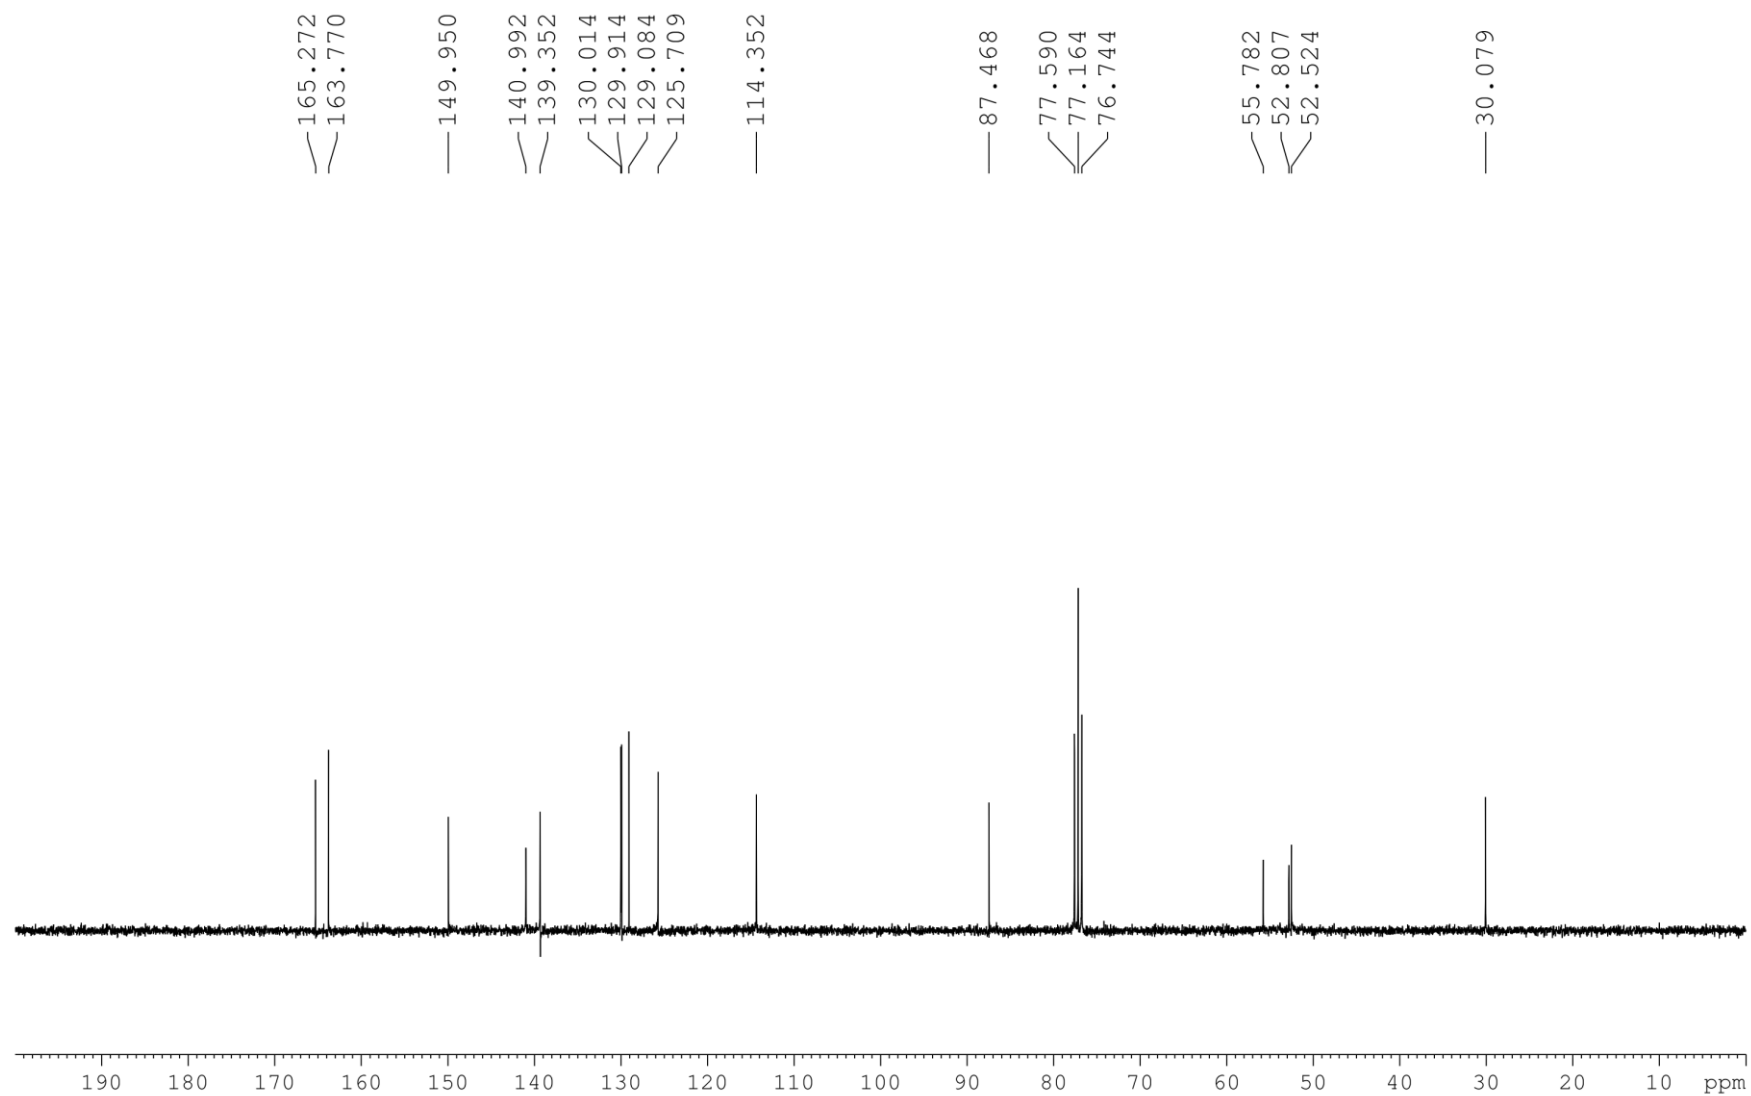

$^{13}\text{C}$  Spectrum for compound 27c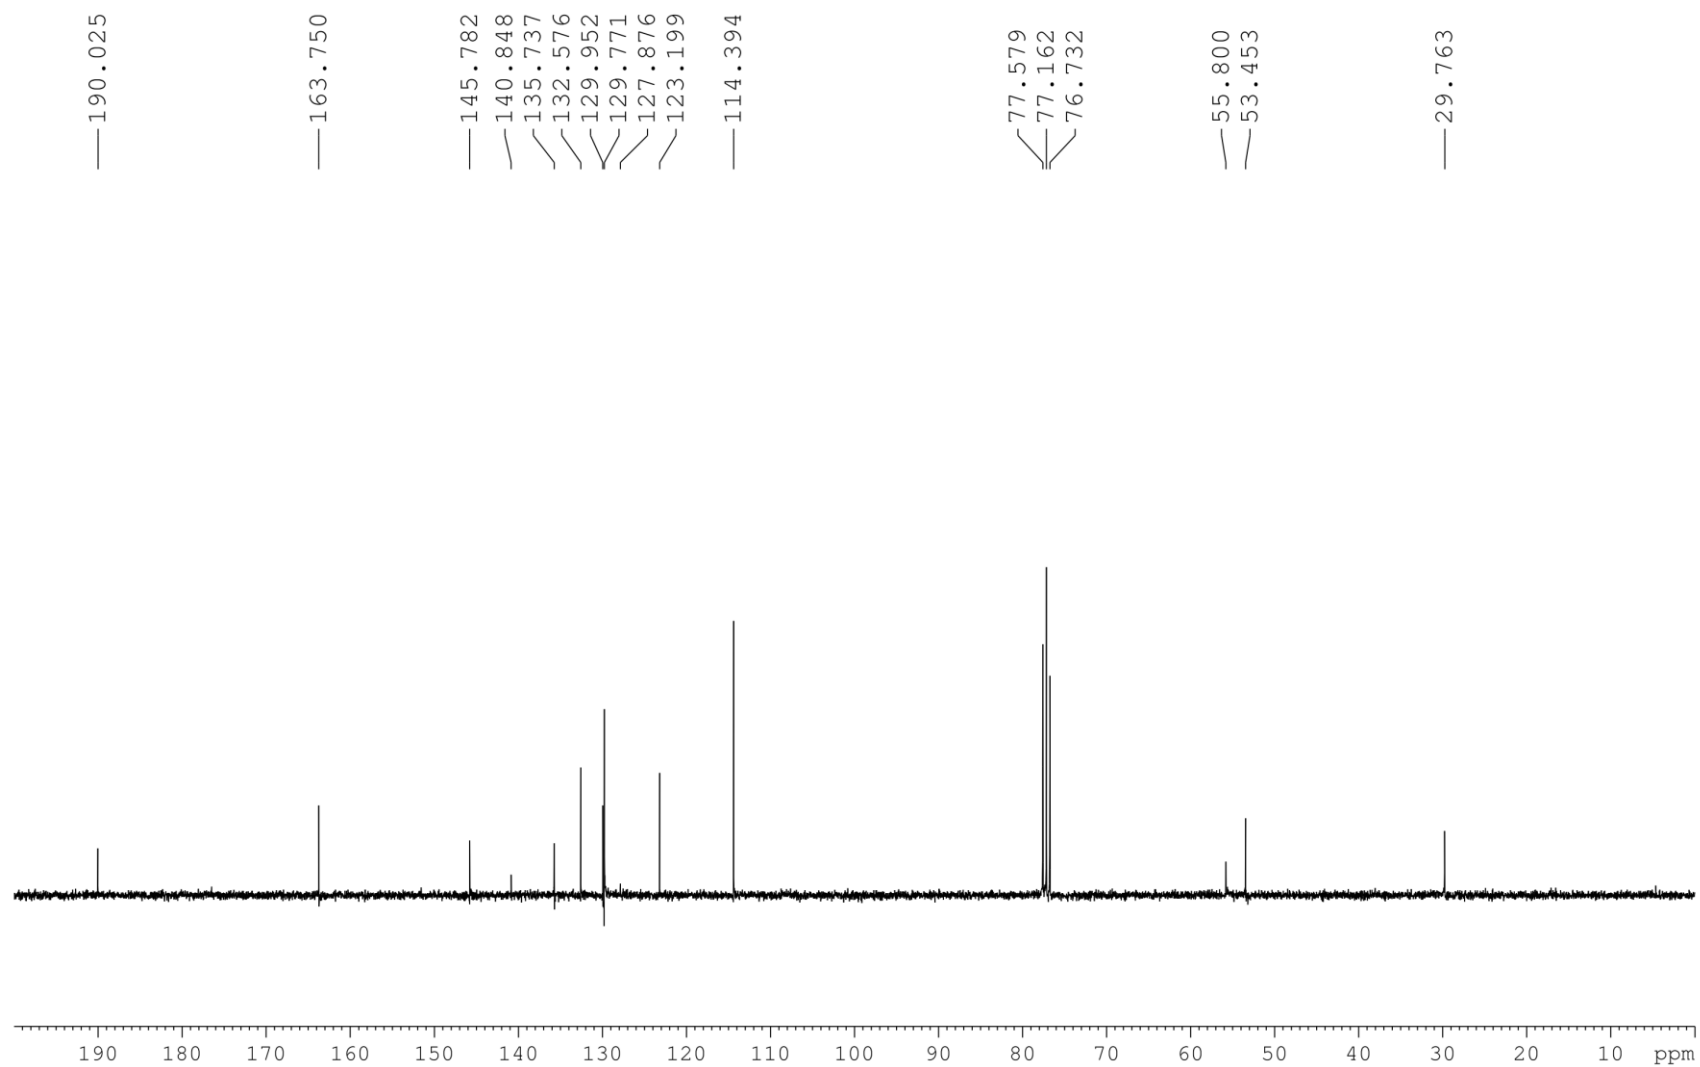

$^{13}\text{C}$  Spectrum for compound 27d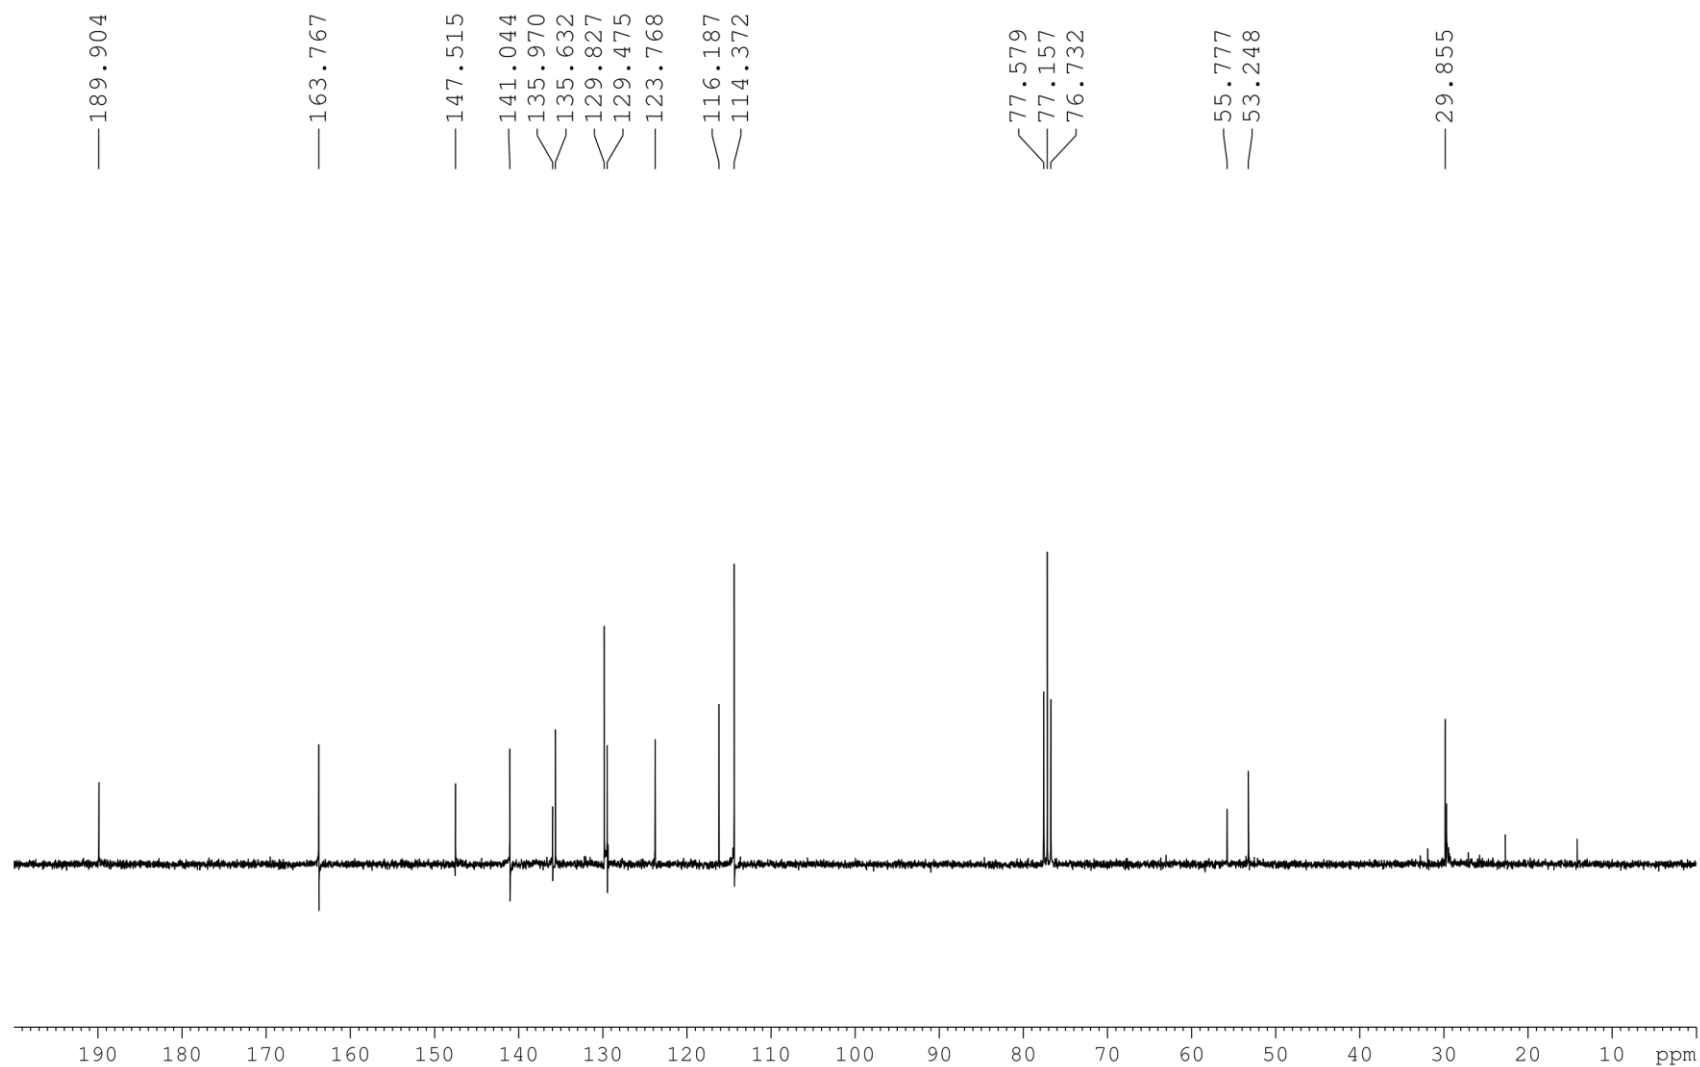

$^{13}\text{C}$  Spectrum for compound 27e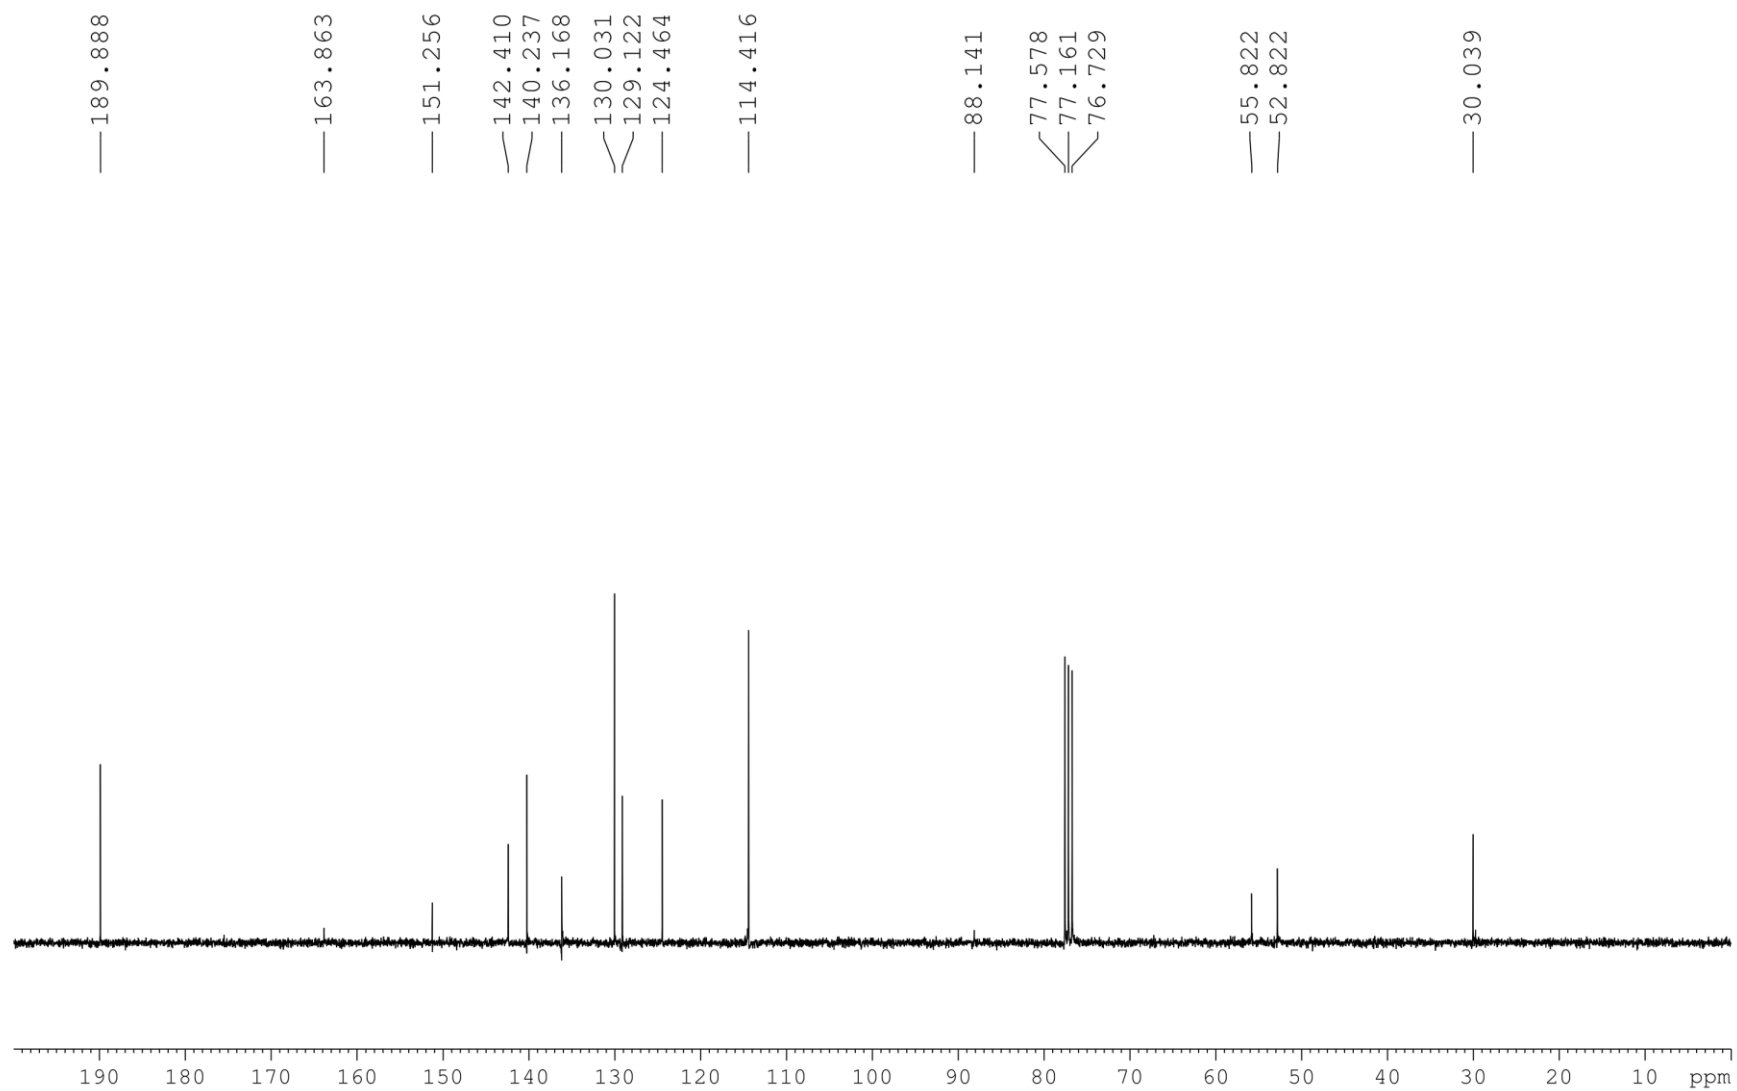

<sup>13</sup>C Spectrum for compound 28f

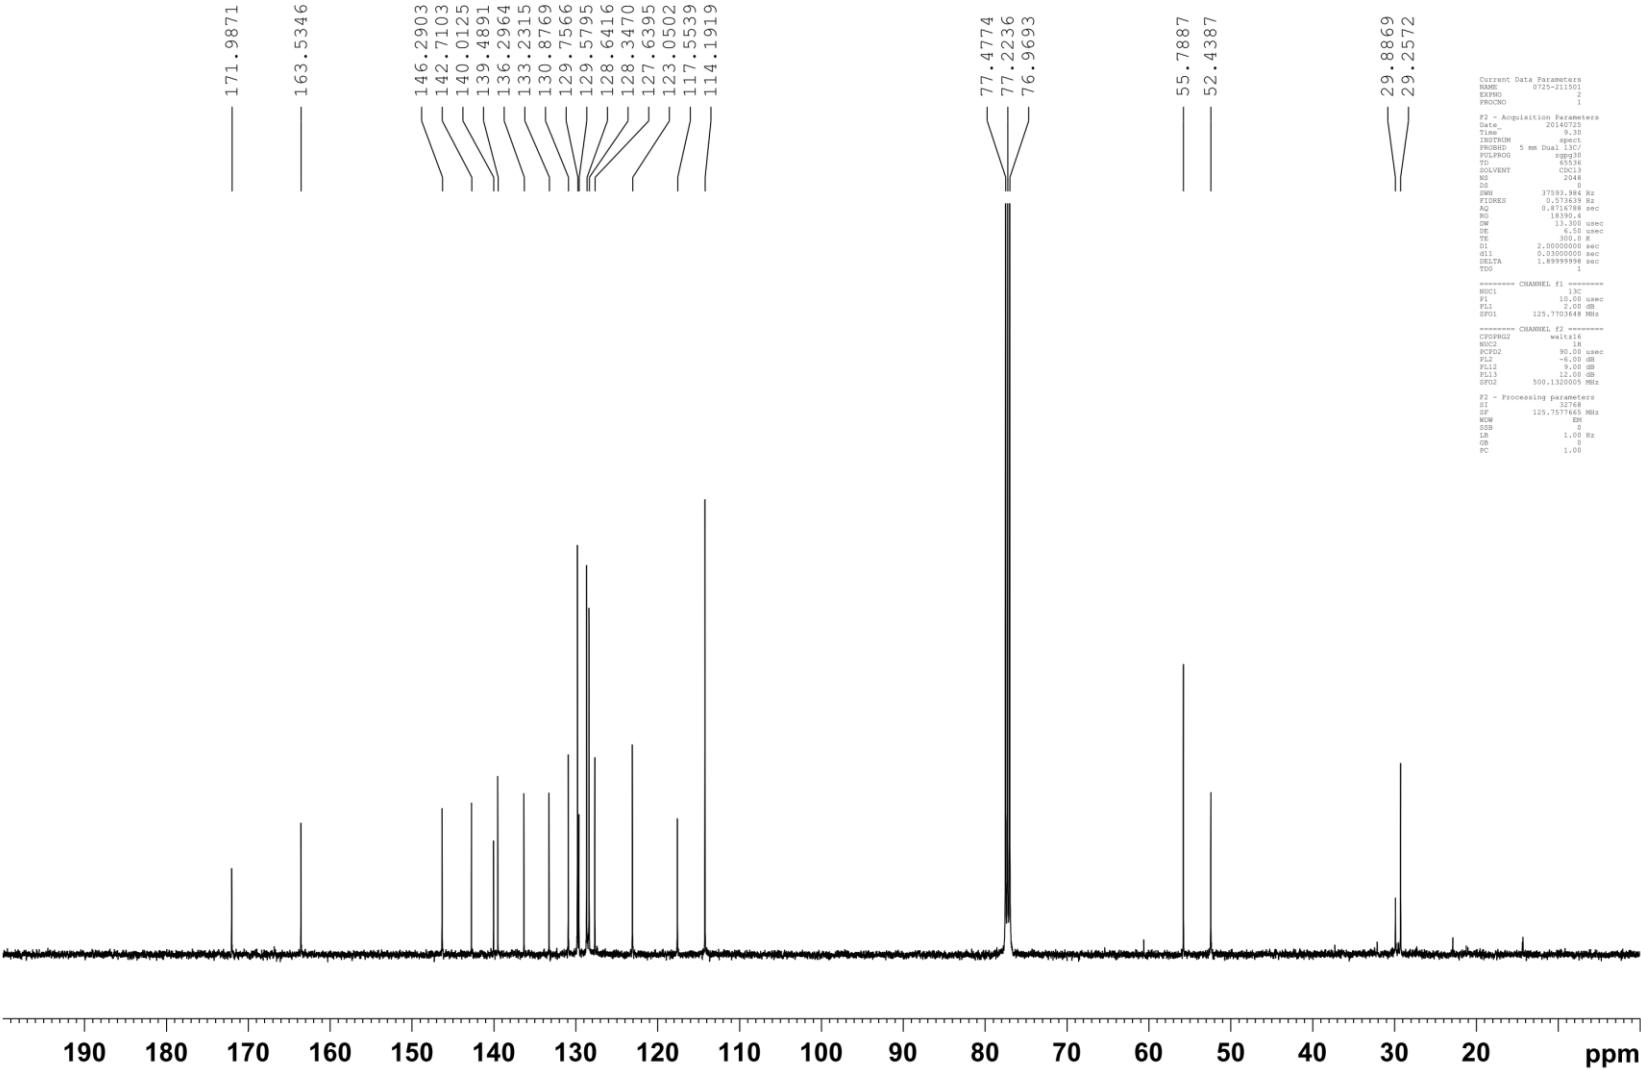

$^{13}\text{C}$  Spectrum for compound 28g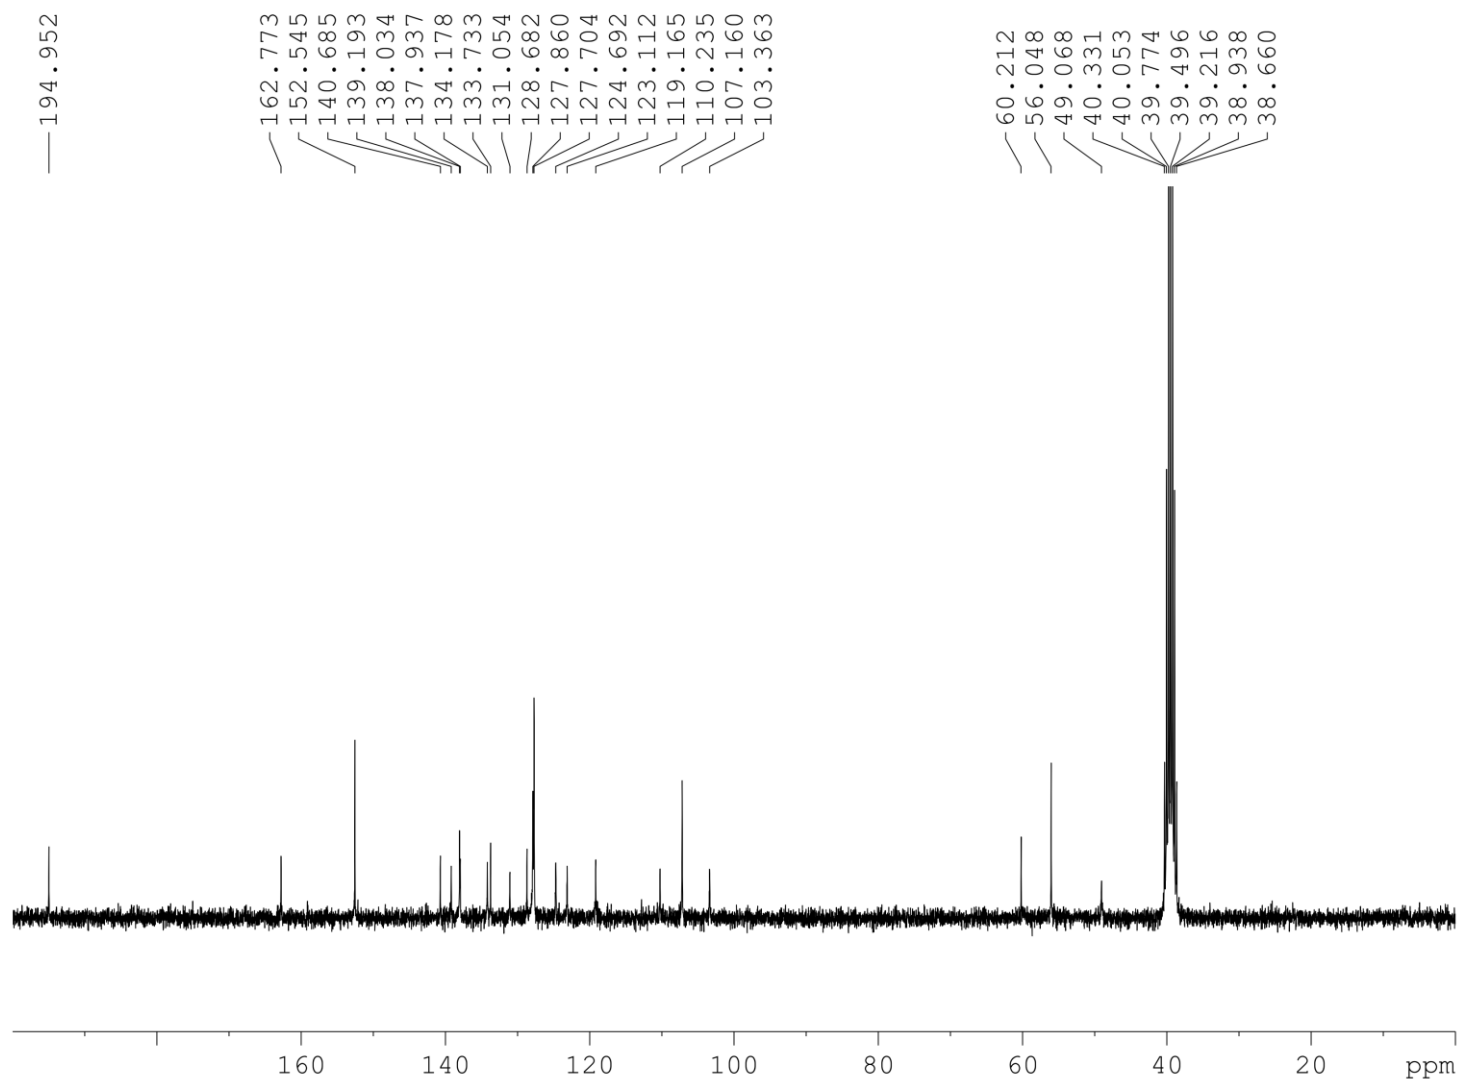

$^{13}\text{C}$  Spectrum for compound 28h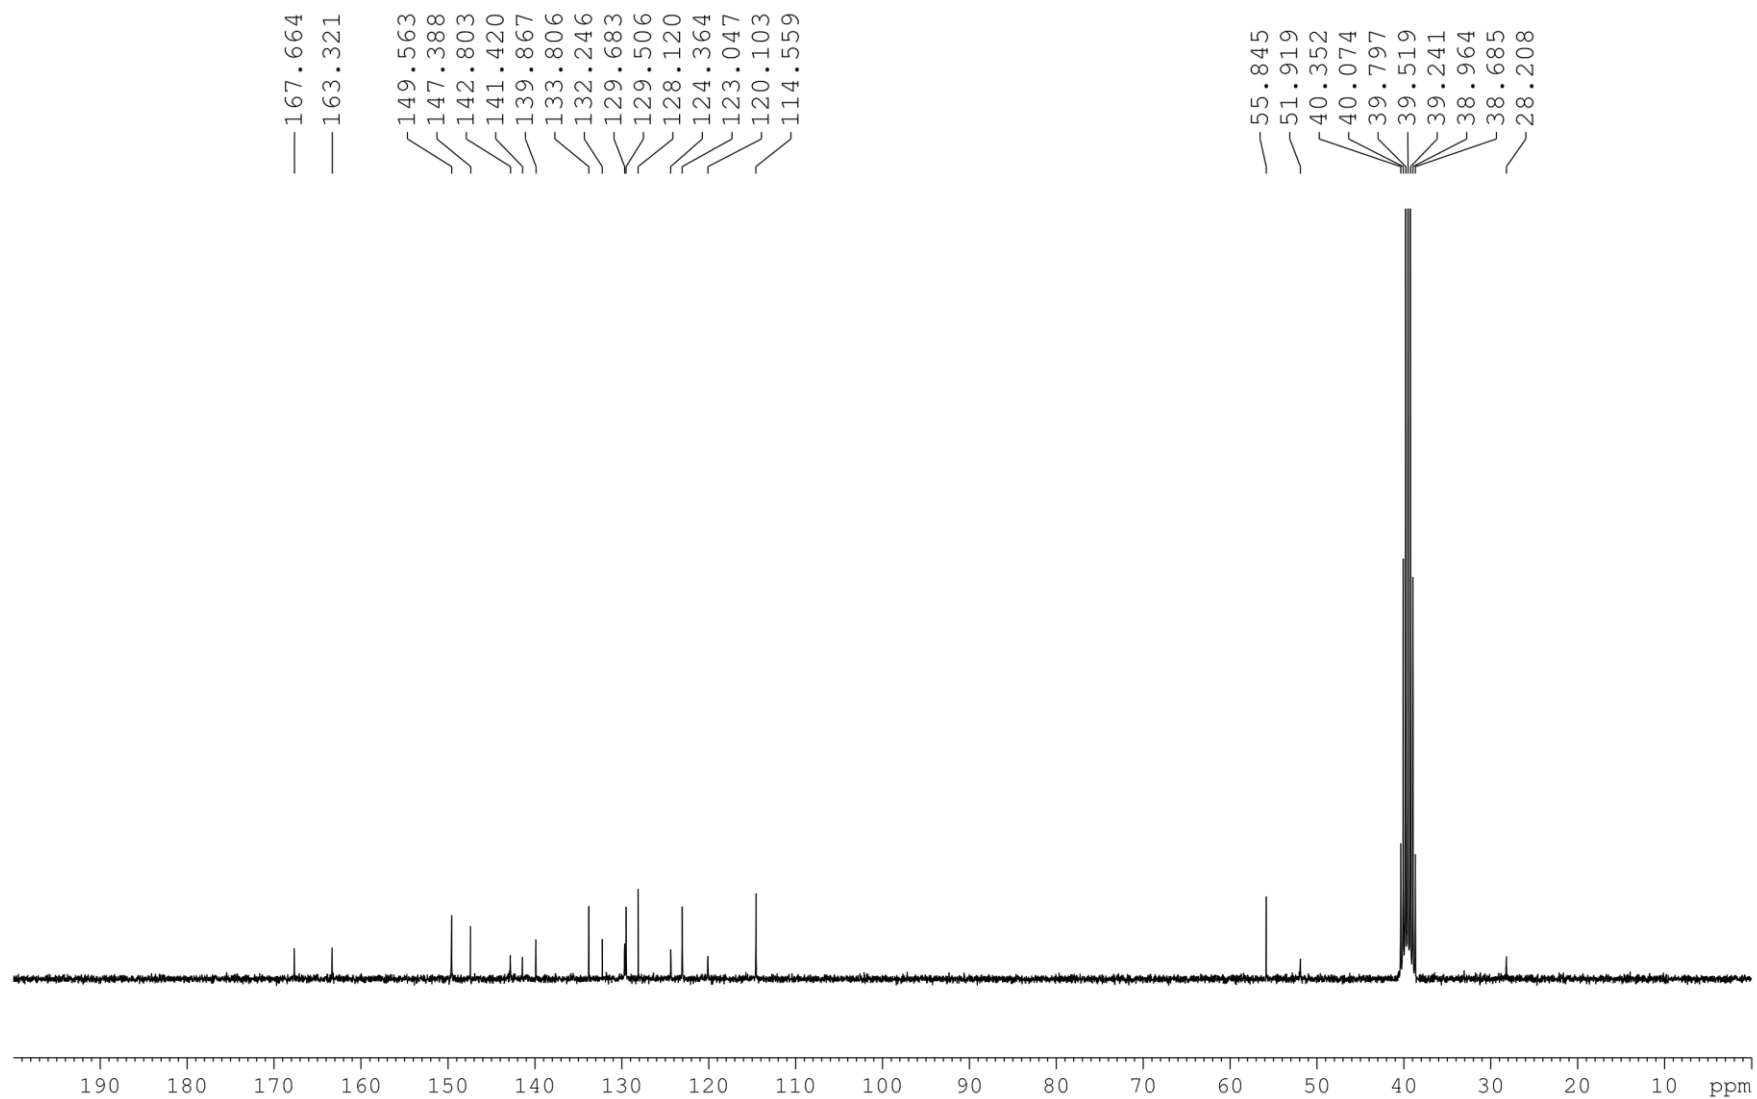

$^{13}\text{C}$  Spectrum for compound 31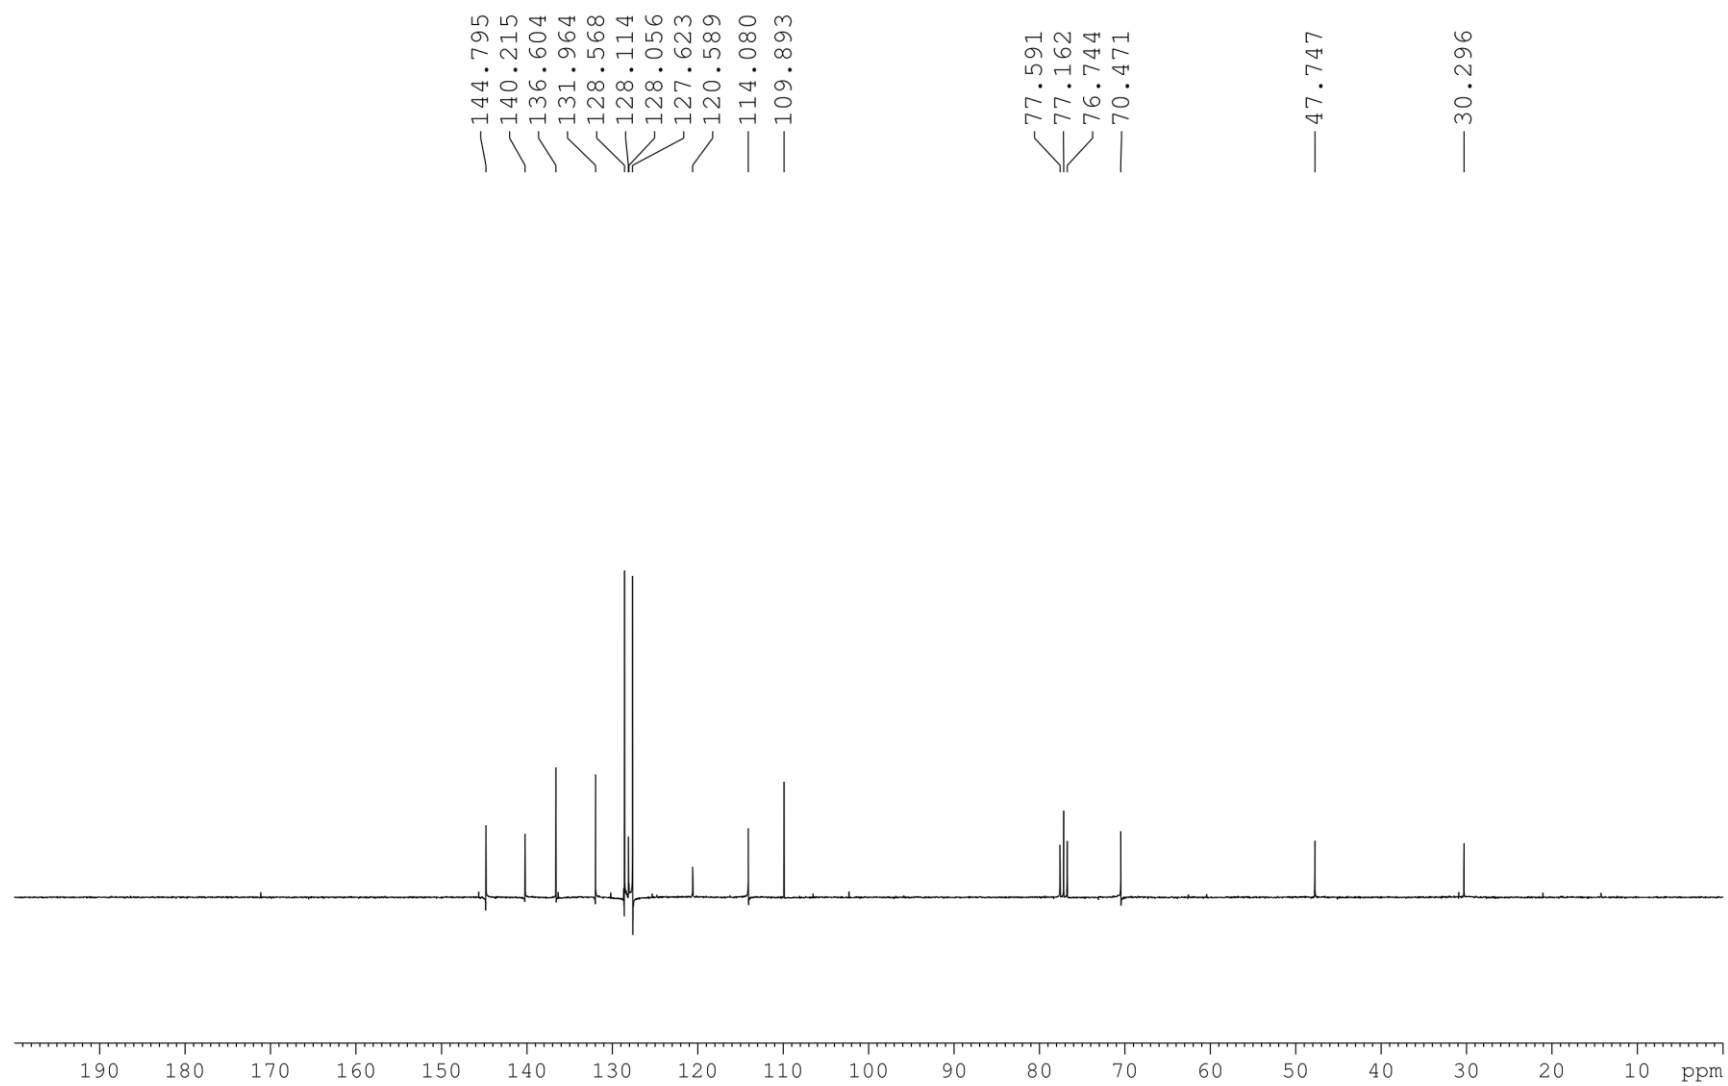

$^{13}\text{C}$  Spectrum for compound 32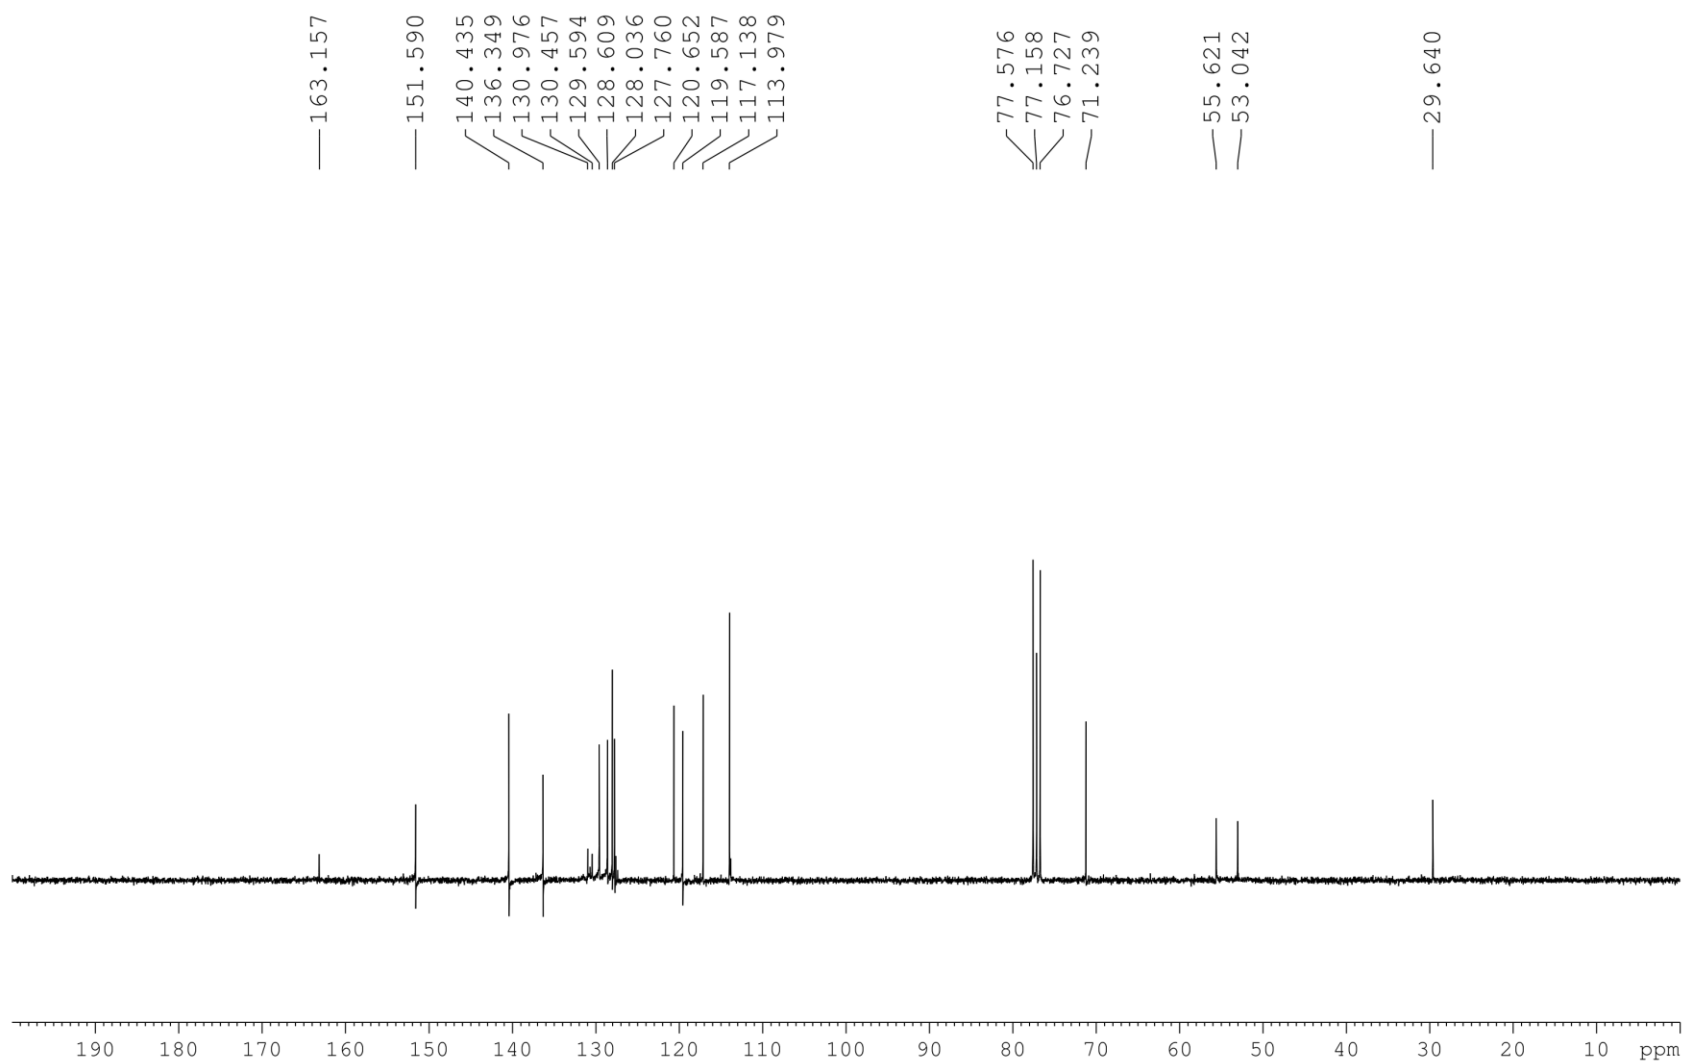

Supplement: c4ob00542b1.pdf [file c4ob00542b1.pdf]
